# Supplementary material
Source: ML conference proceedings conference paper supplement (https://openreview.net/forum?id=2VuPBAH94k)
Supplement: supplementary_material [file image_editing_1000_sources_x4_targets.xlsx]

## Sheet: Sheet1
A photo of a boat landing on a music stage, close-up	A photo of a boat on a music stage, placed in the foreground	A photo of a boat landing on a music stage	A photo of a boat underwater near coral	A photo of 3 boats on a music stage
A watercolor painting of a castle sitting under a thunderstorm sky, facing right	A watercolor painting of a castle with a blue rainbow in the sky under a thunderstorm sky	A watercolor painting of a castle with bronze flowers under a thunderstorm sky	A watercolor painting of a castle under a thunderstorm sky, moved to the left side	A watercolor painting of a castle under a thunderstorm sky under soft studio lighting
A watercolor painting of an astronaut jumping under a thunderstorm sky under soft studio lighting	A watercolor painting of an astronaut under a thunderstorm sky, placed in the foreground	A watercolor painting of an astronaut wearing a red hat under a thunderstorm sky	A watercolor painting of an astronaut under a thunderstorm sky with bright high-key lighting	A watercolor painting of an astronaut on the moon surface
An illustration of a drone flying in a sunrise field with fluorescent indoor lighting, facing right	An illustration of a green drone in a sunrise field	An illustration of a drone at a carnival	An illustration of a drone with 2 blue balloons tied to it in a sunrise field	An illustration of a drone parked in a sunrise field
An illustration of a cyclist typing in a snowy field, facing forward	An illustration of a cyclist on a snowy mountain	An illustration of a cyclist in a snowy field, facing left	An illustration of a cyclist skating in a snowy field	An illustration of a cyclist in a cyan jacket in a snowy field
An illustration of a potted plant standing in a snowy field	An illustration of 3 potted plants in a snowy field	An illustration of a potted plant in a snowy field, placed in the foreground	An illustration of a potted plant in a modern office	An illustration of a potted plant with a maroon ribbon in a snowy field
An illustration of a boat moving underwater near a coral reef under overcast light, facing right	An illustration of 3 boats underwater near a coral reef	An illustration of a boat with 1 white stickers on the door underwater near a coral reef	An illustration of a boat on a space station	An illustration of a boat underwater near a coral reef, shifted slightly upward
A watercolor painting of a violinist running inside a cave	A watercolor painting of a violinist inside a cave with moody low-key lighting	A watercolor painting of a violinist in a foggy forest	A watercolor painting of a violinist inside a cave, overhead view	A watercolor painting of a violinist juggling inside a cave
A watercolor painting of a yoga practitioner jumping in a foggy forest	A watercolor painting of a yoga practitioner in a brown scarf in a foggy forest	A watercolor painting of a yoga practitioner in a foggy forest, in profile	A watercolor painting of a yoga practitioner in a foggy forest with bright high-key lighting	A watercolor painting of a yoga practitioner smiling in a foggy forest
A photo of a lighthouse standing in a city street, overhead view	A photo of 5 lighthouses in a city street	A photo of a lighthouse with blue flowers in a city street	A photo of a lighthouse in a city street with warm tungsten lighting	A photo of a lighthouse in a city street, shifted slightly downward
A 3D render of a subway train racing on a soccer field under overcast light, facing right	A 3D render of a subway train with 3 magenta stickers on the door on a soccer field	A 3D render of a subway train on a soccer field, shifted slightly upward	A 3D render of a subway train on a soccer field, top-down view	A 3D render of 3 subway trains on a soccer field
A photo of a waterfall sitting in a medieval village	A photo of a waterfall in a medieval village, close-up	A photo of a waterfall in a medieval village with warm tungsten lighting	A photo of 5 waterfalls in a medieval village	A photo of a waterfall in a medieval village, shifted slightly downward
A photo of a fox walking at a train station under neon lighting	A photo of a fox wearing maroon glasses at a train station	A photo of a fox with pink scales at a train station	A photo of a fox at a train station, top-down view	A photo of a fox playing at a train station
A photo of a dog jumping on a soccer field	A photo of a dog in a cozy kitchen	A photo of a dog on a soccer field, moved to the left side	A photo of a dog with a orange collar on a soccer field	A photo of a dog on a soccer field with warm tungsten lighting
An oil painting of a tree standing in a sunrise field with moody low-key lighting, facing right	An oil painting of a tree with 4 cyan butterflies around in a sunrise field	An oil painting of a tree on a lake pier	An oil painting of 4 trees in a sunrise field	An oil painting of a tree painted red in a sunrise field
An illustration of a subway train flying in a modern office, close-up	An illustration of a subway train in a modern office, top-down view	An illustration of a subway train with a lavender decal in a modern office	An illustration of a subway train inside a library	An illustration of a subway train in a modern office with bright high-key lighting
An oil painting of a windmill standing on a neon-lit street at night	An oil painting of a windmill with bronze leaves on a neon-lit street at night	An oil painting of 5 windmills on a neon-lit street at night	An oil painting of a windmill on a neon-lit street at night, close-up	An oil painting of a windmill in a neon-lit city at night
A photo of a photographer taking a photo by a riverbank	A photo of a photographer holding a red guitar by a riverbank	A photo of a photographer by a riverbank, overhead view	A photo of a photographer in a navy jacket by a riverbank	A photo of a photographer on the moon surface
A photo of a truck moving in a desert, in profile	A photo of a truck in a desert, top-down view	A photo of a truck on a snowy mountain	A photo of a truck in a desert under soft studio lighting	A photo of a silver truck in a desert
An oil painting of a basketball resting in a snowy field, top-down view	An oil painting of a basketball in a snowy field, centered	An oil painting of 3 basketballs in a snowy field	An oil painting of a basketball on a snowy mountain	An oil painting of a basketball in a snowy field, make it cylindrical
An oil painting of a vase placed in a mountain meadow with bright high-key lighting	An oil painting of a vase in a mountain meadow, isometric view	An oil painting of a vase in a mountain meadow with moody low-key lighting	An oil painting of a brown vase in a mountain meadow	An oil painting of a vase with a silver logo in a mountain meadow
A watercolor painting of a soccer player standing under a thunderstorm sky with bright high-key lighting	A watercolor painting of a soccer player under a thunderstorm sky, close-up	A watercolor painting of 2 soccer players under a thunderstorm sky	A watercolor painting of a soccer player smiling under a thunderstorm sky	A watercolor painting of a soccer player under a thunderstorm sky under soft studio lighting
A watercolor painting of a frog sitting on a basketball court, facing forward	A watercolor painting of a frog playing on a basketball court	A watercolor painting of a frog with lavender feathers on a basketball court	A watercolor painting of 3 frogs on a basketball court	A watercolor painting of a frog on a basketball court with bright high-key lighting
A watercolor painting of a guitarist surfing at a train station	A watercolor painting of a guitarist holding a lime book at a train station	A watercolor painting of a guitarist at a train station, moved to the left side	A watercolor painting of 3 guitarists at a train station	A watercolor painting of a guitarist at a train station, in profile
An oil painting of an astronaut smiling on a music stage	An oil painting of an astronaut doing a yoga pose on a music stage	An oil painting of 5 astronauts on a music stage	An oil painting of an astronaut carrying a white backpack on a music stage	An oil painting of an astronaut at a carnival
An illustration of a train sailing on a lake pier with tiny fairy lights in the background, overhead view	An illustration of a train on a lake pier, placed in the background	An illustration of a train on a lake pier, in profile	An illustration of a lavender train on a lake pier	An illustration of 3 trains on a lake pier
A photo of a painter juggling on a farm under soft studio lighting	A photo of a painter at sunrise in a meadow	A photo of a painter on a farm, moved to the right side	A photo of a painter on a farm, facing forward	A photo of a painter holding a cyan camera on a farm
A 3D render of a car flying at a train station	A 3D render of a car at a train station under soft studio lighting	A 3D render of a car in a foggy forest	A 3D render of 2 cars at a train station	A 3D render of a car at a train station, placed in the foreground
An oil painting of a bridge sitting in a sci-fi corridor	An oil painting of a bridge with a blue rainbow in the sky in a sci-fi corridor	An oil painting of a bridge in a sci-fi corridor, top-down view	An oil painting of a bridge in a sci-fi corridor, moved to the right side	An oil painting of a bridge in a zen garden
An illustration of an astronaut sitting in a temple courtyard, facing left	An illustration of an astronaut in a magenta shirt in a temple courtyard	An illustration of an astronaut on a beach at sunset	An illustration of an astronaut smiling in a temple courtyard	An illustration of 4 astronauts in a temple courtyard
A photo of a tiger jumping in a cozy kitchen backlit with a subtle rim light	A photo of a tiger on the moon surface	A photo of 2 tigers in a cozy kitchen	A photo of a tiger with navy fur in a cozy kitchen	A photo of a tiger jumping in a cozy kitchen
An oil painting of a flower bush sitting in a medieval village	An oil painting of a flower bush in a medieval village, placed in the foreground	An oil painting of a flower bush painted blue in a medieval village	An oil painting of 3 flower bushes in a medieval village	An oil painting of a flower bush on the moon surface
A watercolor painting of a basketball player running in a sunrise field with warm tungsten lighting, facing forward	A watercolor painting of 5 basketball players in a sunrise field	A watercolor painting of a basketball player in a sunrise field, shifted slightly upward	A watercolor painting of a basketball player dancing in a sunrise field	A watercolor painting of a basketball player in a sunrise field, facing left
An oil painting of a dancer waving on a lake pier	An oil painting of 5 dancers on a lake pier	An oil painting of a dancer in a flower garden	An oil painting of a dancer in a navy hat on a lake pier	An oil painting of a dancer on a lake pier, top-down view
A 3D render of a butterfly lying down on a music stage, facing forward	A 3D render of a butterfly on a music stage, isometric view	A 3D render of a butterfly underwater near coral	A 3D render of 2 butterflies on a music stage	A 3D render of a butterfly wearing a beige cape on a music stage
An illustration of an elephant sleeping inside a library under neon lighting	An illustration of an elephant with brown fur inside a library	An illustration of an elephant inside a library under neon lighting	An illustration of an elephant inside a library, facing right	An illustration of an elephant lying down inside a library
An oil painting of a hiker jumping inside an airport terminal under overcast light, isometric view	An oil painting of a hiker surfing inside an airport terminal	An oil painting of a hiker in a pink dress inside an airport terminal	An oil painting of a hiker in a flower garden	An oil painting of a hiker inside an airport terminal under neon lighting
A 3D render of a motorcycle landing on a farm	A 3D render of a motorcycle on a farm, shifted slightly downward	A 3D render of a motorcycle on a farm, make it heart-shaped	A 3D render of a motorcycle on a farm with warm tungsten lighting	A 3D render of a motorcycle landing on a farm
An illustration of a dolphin swimming at an amusement park, overhead view	An illustration of a dolphin leaping out of the water at an amusement park	An illustration of 5 dolphins at an amusement park	An illustration of a dolphin at an amusement park under neon lighting	An illustration of a dolphin wearing a red bandana at an amusement park
A photo of a penguin perched in a garden with warm tungsten lighting	A photo of a penguin in a garden, facing forward	A photo of a penguin in a garden, moved to the right side	A photo of 2 penguins in a garden	A photo of a penguin in a garden with warm tungsten lighting
An illustration of a basketball player juggling in a cozy kitchen, in profile	An illustration of a basketball player in a cozy kitchen, overhead view	An illustration of a basketball player carrying a lime backpack in a cozy kitchen	An illustration of a basketball player in a cozy kitchen under neon lighting	An illustration of a basketball player in a purple hat in a cozy kitchen
A watercolor painting of a deer running in a temple courtyard under neon lighting, close-up	A watercolor painting of a deer in a temple courtyard with bright high-key lighting	A watercolor painting of a deer on the moon surface	A watercolor painting of a deer wearing a maroon hat in a temple courtyard	A watercolor painting of 3 deer in a temple courtyard
A watercolor painting of a vase displayed in outer space	A watercolor painting of a vase in outer space, make it square-shaped	A watercolor painting of a lavender vase in outer space	A watercolor painting of a vase with 3 blue stickers in outer space	A watercolor painting of a vase in outer space, moved to the right side
An illustration of a turtle swimming on the moon under neon lighting, in profile	An illustration of a turtle wearing a gold bandana on the moon	An illustration of a turtle on the moon, moved to the right side	An illustration of 5 turtles on the moon	An illustration of a turtle leaping out of the water on the moon
An oil painting of a castle sitting in an art studio, wide-angle view	An oil painting of a castle with 1 cyan butterflies around in an art studio	An oil painting of a castle in an art studio, in profile	An oil painting of 5 castles in an art studio	An oil painting of a castle in an art studio, moved to the right side
An oil painting of a guitarist posing on a soccer field with fluorescent indoor lighting, top-down view	An oil painting of a guitarist surfing on a soccer field	An oil painting of a guitarist in a brown jacket on a soccer field	An oil painting of a guitarist on a soccer field, shifted slightly upward	An oil painting of a guitarist on a lake pier
An illustration of a horse sitting on a beach, facing forward	An illustration of a horse with blue scales on a beach	An illustration of a horse playing on a beach	An illustration of 5 horses on a beach	An illustration of a horse wearing a beige cape on a beach
An illustration of a bus moving by a riverbank with fluorescent indoor lighting, facing forward	An illustration of 4 buses by a riverbank	An illustration of a bus with a white racing stripe by a riverbank	An illustration of a bus by a riverbank, make it square-shaped	An illustration of a bus landing by a riverbank
An illustration of a skateboard placed on the moon, overhead view	An illustration of a skateboard on the moon, facing forward	An illustration of 2 skateboards on the moon	An illustration of a skateboard on the moon with moody low-key lighting	An illustration of a skateboard on the moon, make it square-shaped
An illustration of a train sailing on a rooftop, wide-angle view	An illustration of a brown train on a rooftop	An illustration of a train on a rooftop, make it square-shaped	An illustration of a train on a rooftop with moody low-key lighting	An illustration of a train at sunrise in a meadow
An illustration of a flower bush sitting on a rocky Mars landscape	An illustration of a flower bush with bronze flowers on a rocky Mars landscape	An illustration of a flower bush in a cozy kitchen	An illustration of a flower bush on a rocky Mars landscape, centered	An illustration of a flower bush on a rocky Mars landscape, facing forward
An oil painting of a rabbit playing inside a cave with bright high-key lighting	An oil painting of a rabbit inside a cave, top-down view	An oil painting of a rabbit with blue fur inside a cave	An oil painting of a rabbit in a neon-lit city at night	An oil painting of a rabbit wearing a navy hat inside a cave
A watercolor painting of a castle sitting in a medieval village with warm tungsten lighting, facing forward	A watercolor painting of a castle in a medieval village, wide-angle view	A watercolor painting of a castle with maroon leaves in a medieval village	A watercolor painting of a castle in a medieval village under overcast light	A watercolor painting of a castle in a medieval village, moved to the left side
An illustration of a bus racing in a forest	An illustration of a bus in a forest, facing right	An illustration of a bus in a forest, make it triangular	An illustration of a bus sailing in a forest	An illustration of a brown bus in a forest
A photo of a bee lying down with a city skyline behind	A photo of a bee with a city skyline behind, centered	A photo of a bee wearing a lime cape with a city skyline behind	A photo of a bee with a city skyline behind with tiny fairy lights in the background	A photo of a bee inside a library
An oil painting of a fish diving at a carnival backlit with a subtle rim light	An oil painting of a fish on the moon surface	An oil painting of a fish at a carnival, moved to the left side	An oil painting of a fish with cyan fur at a carnival	An oil painting of a fish diving at a carnival
A watercolor painting of a cyclist hiking in a city street	A watercolor painting of 3 cyclists in a city street	A watercolor painting of a cyclist holding a magenta microphone in a city street	A watercolor painting of a cyclist in a city street, wide-angle view	A watercolor painting of a cyclist in a black jacket in a city street
An oil painting of a sand dune sitting in a temple courtyard under soft studio lighting	An oil painting of a sand dune in a temple courtyard with warm tungsten lighting	An oil painting of a sand dune in a temple courtyard, shifted slightly downward	An oil painting of a sand dune in a temple courtyard, isometric view	An oil painting of a sand dune with a beige rainbow in the sky in a temple courtyard
An illustration of a camera placed in outer space	An illustration of a red camera in outer space	An illustration of a camera at sunrise in a meadow	An illustration of a camera with 4 green stickers in outer space	An illustration of a camera in outer space, make it cylindrical
A 3D render of a guitarist surfing in a foggy forest with warm tungsten lighting, close-up	A 3D render of a guitarist in a foggy forest under soft studio lighting	A 3D render of a guitarist playing guitar in a foggy forest	A 3D render of a guitarist in a foggy forest, moved to the right side	A 3D render of a guitarist in a foggy forest, isometric view
A 3D render of a tiger walking at a carnival	A 3D render of a tiger at a carnival, close-up	A 3D render of 4 tigers at a carnival	A 3D render of a tiger at a carnival with warm tungsten lighting	A 3D render of a tiger at a carnival, shifted slightly downward
A photo of a drone racing in outer space, isometric view	A photo of a beige drone in outer space	A photo of a drone parked in outer space	A photo of a drone in outer space, make it heart-shaped	A photo of a drone in outer space under golden-hour lighting
A photo of a boat racing inside an airport terminal under golden-hour lighting, top-down view	A photo of a gold boat inside an airport terminal	A photo of a boat inside an airport terminal, make it round	A photo of a boat inside an airport terminal, placed in the foreground	A photo of a boat moving inside an airport terminal
An illustration of a lizard sleeping in a sunrise field under golden-hour lighting, facing forward	An illustration of a lizard in a sunrise field, top-down view	An illustration of a lizard in a desert with dunes	An illustration of 4 lizards in a sunrise field	An illustration of a lizard in a sunrise field backlit with a subtle rim light
A watercolor painting of a truck moving at an open-air market under golden-hour lighting	A watercolor painting of a truck with a teal roof rack at an open-air market	A watercolor painting of a truck inside a library	A watercolor painting of a truck at an open-air market, shifted slightly downward	A watercolor painting of a magenta truck at an open-air market
A photo of an airplane drifting on a beach	A photo of an airplane on a beach, facing forward	A photo of 4 airplanes on a beach	A photo of a cyan airplane on a beach	A photo of an airplane on a beach, make it cylindrical
A photo of a windmill standing on the moon with bright high-key lighting	A photo of a windmill with 1 magenta lanterns hanging nearby on the moon	A photo of a windmill on the moon with bright high-key lighting	A photo of 2 windmills on the moon	A photo of a windmill on the moon, placed in the foreground
A 3D render of a rabbit sitting inside a cave backlit with a subtle rim light, close-up	A 3D render of a rabbit in a flower garden	A 3D render of 5 rabbits inside a cave	A 3D render of a rabbit wearing a bronze hat inside a cave	A 3D render of a rabbit inside a cave, shifted slightly upward
An oil painting of a runner hiking at a skate park under soft studio lighting, overhead view	An oil painting of a runner at a skate park, moved to the left side	An oil painting of a runner at a skate park with moody low-key lighting	An oil painting of a runner wearing a beige jacket at a skate park	An oil painting of a runner at a skate park, close-up
An oil painting of a horse standing in a medieval village	An oil painting of a horse in a medieval village, shifted slightly downward	An oil painting of a horse in a medieval village with warm tungsten lighting	An oil painting of a horse in a zen garden	An oil painting of a horse with bronze scales in a medieval village
An illustration of a tiger sleeping in a foggy forest, isometric view	An illustration of a tiger with blue feathers in a foggy forest	An illustration of a tiger in a foggy forest, centered	An illustration of a tiger lying down in a foggy forest	An illustration of a tiger wearing a pink cape in a foggy forest
An illustration of a laptop placed in a modern office under golden-hour lighting	An illustration of a laptop in a modern office	An illustration of a laptop in a modern office, placed in the background	An illustration of a laptop in a modern office under soft studio lighting	An illustration of a laptop in a modern office, make it cylindrical
An oil painting of a squirrel jumping on a rocky Mars landscape with tiny fairy lights in the background, top-down view	An oil painting of a squirrel on a rocky Mars landscape, moved to the right side	An oil painting of a squirrel with silver feathers on a rocky Mars landscape	An oil painting of a squirrel with a white collar on a rocky Mars landscape	An oil painting of a squirrel on a rocky Mars landscape, in profile
A 3D render of a frog playing on a farm	A 3D render of a frog on a farm, moved to the left side	A 3D render of a frog on a farm under overcast light	A 3D render of 4 frogs on a farm	A 3D render of a frog on a beach at sunset
An oil painting of a painting sitting at a cafe with moody low-key lighting, top-down view	An oil painting of a painting with 4 brown stickers at a cafe	An oil painting of 2 paintings at a cafe	An oil painting of a painting at a cafe, make it round	An oil painting of a painting at a cafe under overcast light
A 3D render of a bear jumping in outer space	A 3D render of a bear with a silver collar in outer space	A 3D render of a bear underwater near coral	A 3D render of a bear in outer space with fluorescent indoor lighting	A 3D render of a bear with lime feathers in outer space
A photo of a hat standing at an amusement park, facing right	A photo of a hat at an amusement park with moody low-key lighting	A photo of 4 hats at an amusement park	A photo of a hat with 3 purple stickers at an amusement park	A photo of a hat on the moon surface
An oil painting of a surfer posing on a basketball court	An oil painting of a surfer on a basketball court, overhead view	An oil painting of a surfer in a brown dress on a basketball court	An oil painting of 5 surfers on a basketball court	An oil painting of a surfer on a basketball court under overcast light
An illustration of a cake standing in a classroom, wide-angle view	An illustration of a cake in a classroom with bright high-key lighting	An illustration of a cake in a classroom, make it triangular	An illustration of a cake with a gold logo in a classroom	An illustration of a navy cake in a classroom
An illustration of a sushi platter displayed in outer space with tiny fairy lights in the background	An illustration of a sushi platter in outer space, top-down view	An illustration of a sushi platter in outer space backlit with a subtle rim light	An illustration of a maroon sushi platter in outer space	An illustration of 5 sushi platters in outer space
A 3D render of a windmill standing with a city skyline behind backlit with a subtle rim light	A 3D render of a windmill with a city skyline behind, shifted slightly downward	A 3D render of a windmill with a city skyline behind, overhead view	A 3D render of a windmill with 4 lime lanterns hanging nearby with a city skyline behind	A 3D render of 2 windmills with a city skyline behind
An illustration of an owl flying on a sunset beach, facing right	An illustration of an owl on a sunset beach, shifted slightly upward	An illustration of an owl on a space station	An illustration of an owl on a sunset beach with bright high-key lighting	An illustration of an owl with magenta shell on a sunset beach
An oil painting of a windmill standing at an open-air market under soft studio lighting	An oil painting of 3 windmills at an open-air market	An oil painting of a windmill painted silver at an open-air market	An oil painting of a windmill at an open-air market with tiny fairy lights in the background	An oil painting of a windmill at an open-air market, facing forward
A photo of a cat sitting with a city skyline behind, top-down view	A photo of a cat wearing a brown cape with a city skyline behind	A photo of a cat inside a library	A photo of a cat running with a city skyline behind	A photo of a cat with a city skyline behind, placed in the background
A watercolor painting of a guitarist reading in a city street with moody low-key lighting	A watercolor painting of a guitarist in a city street, overhead view	A watercolor painting of a guitarist wearing silver glasses in a city street	A watercolor painting of a guitarist in a lime shirt in a city street	A watercolor painting of 2 guitarists in a city street
An oil painting of a yoga practitioner playing guitar in a city street, facing left	An oil painting of a yoga practitioner smiling in a city street	An oil painting of a yoga practitioner in a city street, in profile	An oil painting of a yoga practitioner in a cozy kitchen	An oil painting of 2 yoga practitioners in a city street
A 3D render of a windmill standing at a skate park with moody low-key lighting, in profile	A 3D render of a windmill on a beach at sunset	A 3D render of 2 windmills at a skate park	A 3D render of a windmill at a skate park, facing forward	A 3D render of a windmill at a skate park, moved to the left side
A watercolor painting of a yoga practitioner standing inside a cave with tiny fairy lights in the background, facing forward	A watercolor painting of 4 yoga practitioners inside a cave	A watercolor painting of a yoga practitioner in a yellow dress inside a cave	A watercolor painting of a yoga practitioner in a cozy kitchen	A watercolor painting of a yoga practitioner posing inside a cave
A photo of a dolphin swimming near a waterfall under soft studio lighting	A photo of a dolphin with gold feathers near a waterfall	A photo of 5 dolphins near a waterfall	A photo of a dolphin near a waterfall with fluorescent indoor lighting	A photo of a dolphin on the moon surface
A watercolor painting of a helicopter moving in outer space backlit with a subtle rim light	A watercolor painting of a helicopter moving in outer space	A watercolor painting of a helicopter in outer space with moody low-key lighting	A watercolor painting of a helicopter in outer space, make it cylindrical	A watercolor painting of a helicopter in outer space, placed in the foreground
A photo of a teapot placed in a castle hall with tiny fairy lights in the background, facing left	A photo of a teapot in a castle hall, close-up	A photo of a teapot in a flower garden	A photo of 5 teapots in a castle hall	A photo of a lavender teapot in a castle hall
A photo of a waterfall sitting in a cozy kitchen, top-down view	A photo of a waterfall in a cozy kitchen under golden-hour lighting	A photo of a waterfall in a cozy kitchen	A photo of a waterfall in a cozy kitchen, placed in the foreground	A photo of a waterfall with purple flowers in a cozy kitchen
A 3D render of a windmill standing in a zen garden, isometric view	A 3D render of a windmill in a zen garden with warm tungsten lighting	A 3D render of a windmill with yellow leaves in a zen garden	A 3D render of a windmill inside a library	A 3D render of a windmill in a zen garden, moved to the left side
A 3D render of a pagoda standing in a city street, top-down view	A 3D render of a pagoda in a city street with fluorescent indoor lighting	A 3D render of a pagoda on a space station	A 3D render of a pagoda in a city street, moved to the left side	A 3D render of a pagoda painted purple in a city street
A 3D render of a potted plant standing in a zen garden under golden-hour lighting, facing left	A 3D render of a potted plant with 3 green stickers in a zen garden	A 3D render of a potted plant on a rainy street	A 3D render of a gold potted plant in a zen garden	A 3D render of a potted plant in a zen garden, make it heart-shaped
A 3D render of a burger sitting in a temple courtyard	A 3D render of a burger in a temple courtyard, make it triangular	A 3D render of a burger with a navy logo in a temple courtyard	A 3D render of a teal burger in a temple courtyard	A 3D render of a burger underwater near coral
A watercolor painting of a burger sitting near a waterfall	A watercolor painting of a burger near a waterfall, close-up	A watercolor painting of a burger at sunrise in a meadow	A watercolor painting of a maroon burger near a waterfall	A watercolor painting of a burger near a waterfall with moody low-key lighting
An oil painting of a butterfly lying down on a rooftop with fluorescent indoor lighting	An oil painting of a butterfly on a rooftop under overcast light	An oil painting of 5 butterflies on a rooftop	An oil painting of a butterfly on a rooftop, overhead view	An oil painting of a butterfly on the moon surface
An oil painting of a pagoda standing in a mountain meadow, isometric view	An oil painting of a pagoda in a mountain meadow with warm tungsten lighting	An oil painting of 4 pagodas in a mountain meadow	An oil painting of a pagoda with 3 maroon birds in the branches in a mountain meadow	An oil painting of a pagoda painted blue in a mountain meadow
An oil painting of a runner typing at a skate park, top-down view	An oil painting of a runner at a skate park, facing forward	An oil painting of 5 runners at a skate park	An oil painting of a runner at a skate park with moody low-key lighting	An oil painting of a runner typing at a skate park
A watercolor painting of a bee running near a waterfall, close-up	A watercolor painting of a bee wearing a red bandana near a waterfall	A watercolor painting of a bee with beige shell near a waterfall	A watercolor painting of a bee near a waterfall, placed in the background	A watercolor painting of a bee near a waterfall, in profile
An oil painting of a bicycle flying at a carnival under neon lighting	An oil painting of a bicycle with 4 pink balloons tied to it at a carnival	An oil painting of a bicycle at a carnival, make it triangular	An oil painting of a bicycle in a zen garden	An oil painting of 5 bicycles at a carnival
A photo of a motorcycle racing in a city street, facing forward	A photo of a motorcycle in a city street with fluorescent indoor lighting	A photo of a motorcycle in a city street, overhead view	A photo of a motorcycle with a bronze roof rack in a city street	A photo of a motorcycle in a city street, make it cylindrical
A photo of a bridge sitting in outer space, top-down view	A photo of a bridge in outer space, shifted slightly downward	A photo of a bridge with white flowers in outer space	A photo of a bridge in a foggy forest	A photo of 3 bridges in outer space
A watercolor painting of a waterfall sitting on a basketball court with fluorescent indoor lighting	A watercolor painting of 5 waterfalls on a basketball court	A watercolor painting of a waterfall on a basketball court, moved to the left side	A watercolor painting of a waterfall on a basketball court under soft studio lighting	A watercolor painting of a waterfall inside a library
A 3D render of a bicycle moving inside an airport terminal, in profile	A 3D render of a bicycle sailing inside an airport terminal	A 3D render of a bicycle by a waterfall	A 3D render of a bicycle inside an airport terminal with tiny fairy lights in the background	A 3D render of a bicycle inside an airport terminal, top-down view
An oil painting of a sailboat parked at an open-air market, facing forward	An oil painting of a sailboat at an open-air market, close-up	An oil painting of a white sailboat at an open-air market	An oil painting of a sailboat inside a library	An oil painting of 4 sailboats at an open-air market
An illustration of a boat drifting inside a library	An illustration of a boat in a zen garden	An illustration of a boat inside a library, make it cylindrical	An illustration of a boat inside a library with bright high-key lighting	An illustration of a boat parked inside a library
A watercolor painting of a wolf sitting on the moon, top-down view	A watercolor painting of a wolf on the moon, close-up	A watercolor painting of 3 wolves on the moon	A watercolor painting of a wolf on the moon with tiny fairy lights in the background	A watercolor painting of a wolf jumping on the moon
A 3D render of a painting standing at an amusement park backlit with a subtle rim light	A 3D render of a painting with a orange logo at an amusement park	A 3D render of a teal painting at an amusement park	A 3D render of a painting at an amusement park, top-down view	A 3D render of a painting at an amusement park, make it heart-shaped
An illustration of a flower bush sitting on a beach	An illustration of a flower bush painted red on a beach	An illustration of a flower bush on a beach, moved to the left side	An illustration of a flower bush with 1 white butterflies around on a beach	An illustration of a flower bush on a beach, facing right
An oil painting of a dolphin swimming inside a library, facing forward	An oil painting of a dolphin on a snowy mountain	An oil painting of 3 dolphins inside a library	An oil painting of a dolphin inside a library, facing left	An oil painting of a dolphin inside a library, placed in the foreground
A 3D render of a windmill standing in a temple courtyard	A 3D render of 4 windmills in a temple courtyard	A 3D render of a windmill in a cozy kitchen	A 3D render of a windmill with a black rainbow in the sky in a temple courtyard	A 3D render of a windmill in a temple courtyard, overhead view
A watercolor painting of a surfer skating in a castle hall under overcast light, isometric view	A watercolor painting of a surfer in a castle hall, shifted slightly downward	A watercolor painting of a surfer sitting in a castle hall	A watercolor painting of a surfer in a castle hall, close-up	A watercolor painting of a surfer in a castle hall under golden-hour lighting
An oil painting of a bicycle taking off at a train station with bright high-key lighting, overhead view	An oil painting of a bicycle at a train station, centered	An oil painting of a bicycle moving at a train station	An oil painting of a bicycle at a train station, isometric view	An oil painting of a bicycle at a train station, make it cylindrical
A watercolor painting of a bicycle moving on a sunset beach, top-down view	A watercolor painting of a bicycle on a lake pier	A watercolor painting of a green bicycle on a sunset beach	A watercolor painting of a bicycle on a sunset beach with moody low-key lighting	A watercolor painting of a bicycle with a bronze racing stripe on a sunset beach
An oil painting of a windmill standing in outer space	An oil painting of a windmill by a waterfall	An oil painting of 4 windmills in outer space	An oil painting of a windmill in outer space under soft studio lighting	An oil painting of a windmill in outer space, facing right
A 3D render of a train flying inside an airport terminal, facing left	A 3D render of 5 trains inside an airport terminal	A 3D render of a train with 3 silver balloons tied to it inside an airport terminal	A 3D render of a train drifting inside an airport terminal	A 3D render of a train inside an airport terminal, facing left
An oil painting of a turtle diving on a basketball court, overhead view	An oil painting of a turtle with beige shell on a basketball court	An oil painting of a turtle wearing a magenta scarf on a basketball court	An oil painting of 3 turtles on a basketball court	An oil painting of a turtle diving on a basketball court
A watercolor painting of an astronaut doing a yoga pose in an art studio	A watercolor painting of an astronaut in an art studio with moody low-key lighting	A watercolor painting of an astronaut in a gold dress in an art studio	A watercolor painting of an astronaut holding a beige coffee cup in an art studio	A watercolor painting of an astronaut running in an art studio
A photo of a sushi platter resting in a foggy forest	A photo of a sushi platter with a yellow ribbon in a foggy forest	A photo of 5 sushi platters in a foggy forest	A photo of a sushi platter in a foggy forest, moved to the left side	A photo of a sushi platter in a foggy forest, overhead view
An oil painting of a fox standing in a medieval village	An oil painting of a fox sitting in a medieval village	An oil painting of 2 foxes in a medieval village	An oil painting of a fox with yellow shell in a medieval village	An oil painting of a fox in a medieval village, placed in the background
An oil painting of a bicycle sailing under a thunderstorm sky	An oil painting of a bicycle under a thunderstorm sky, facing forward	An oil painting of a bicycle at sunrise in a meadow	An oil painting of 2 bicycles under a thunderstorm sky	An oil painting of a bicycle under a thunderstorm sky, make it square-shaped
A photo of a train racing in a mountain meadow with fluorescent indoor lighting, overhead view	A photo of a train on a beach at sunset	A photo of a train in a mountain meadow with fluorescent indoor lighting	A photo of a yellow train in a mountain meadow	A photo of a train in a mountain meadow, make it heart-shaped
A photo of a tree standing in a modern office under golden-hour lighting	A photo of a tree in a modern office, placed in the foreground	A photo of a tree in a modern office, facing left	A photo of a tree with 1 bronze butterflies around in a modern office	A photo of 5 trees in a modern office
A 3D render of a burger standing in a castle hall, top-down view	A 3D render of a burger in a castle hall, wide-angle view	A 3D render of a burger in a zen garden	A 3D render of a burger in a castle hall, make it triangular	A 3D render of a burger in a castle hall, moved to the right side
A 3D render of a potted plant resting inside an airport terminal under overcast light, top-down view	A 3D render of a potted plant inside an airport terminal, facing left	A 3D render of 3 potted plants inside an airport terminal	A 3D render of a potted plant inside an airport terminal, make it heart-shaped	A 3D render of a potted plant on a snowy mountain
An illustration of a skateboarder juggling on the moon, wide-angle view	An illustration of a skateboarder playing guitar on the moon	An illustration of a skateboarder on the moon, moved to the right side	An illustration of a skateboarder on the moon, close-up	An illustration of a skateboarder inside a library
A watercolor painting of a subway train moving in a modern office	A watercolor painting of a subway train landing in a modern office	A watercolor painting of a subway train with a lavender racing stripe in a modern office	A watercolor painting of a subway train in a modern office, close-up	A watercolor painting of a subway train in a modern office, make it square-shaped
An oil painting of a rabbit sleeping in a forest	An oil painting of a rabbit in a forest, shifted slightly downward	An oil painting of a rabbit with brown shell in a forest	An oil painting of a rabbit running in a forest	An oil painting of a rabbit on a rainy street
A photo of a bus flying on a sunset beach	A photo of 4 buses on a sunset beach	A photo of a bus in a zen garden	A photo of a bus on a sunset beach, centered	A photo of a bus on a sunset beach, make it round
A watercolor painting of a chef playing guitar on a rooftop	A watercolor painting of 4 cheves on a rooftop	A watercolor painting of a chef in a foggy forest	A watercolor painting of a chef on a rooftop under overcast light	A watercolor painting of a chef hiking on a rooftop
A watercolor painting of a windmill standing in a classroom with moody low-key lighting	A watercolor painting of a windmill on a rainy street	A watercolor painting of a windmill with a orange rainbow in the sky in a classroom	A watercolor painting of a windmill in a classroom, placed in the foreground	A watercolor painting of a windmill painted beige in a classroom
A 3D render of a sand dune sitting on a sunset beach, overhead view	A 3D render of a sand dune on a sunset beach under golden-hour lighting	A 3D render of a sand dune with a gold rainbow in the sky on a sunset beach	A 3D render of a sand dune on a beach at sunset	A 3D render of 5 sand dunes on a sunset beach
An illustration of a guitarist posing in a modern office, facing right	An illustration of a guitarist in a modern office, isometric view	An illustration of a guitarist on a lake pier	An illustration of a guitarist holding a teal umbrella in a modern office	An illustration of a guitarist in a modern office with bright high-key lighting
A photo of a butterfly running at an amusement park	A photo of a butterfly at an amusement park, top-down view	A photo of a butterfly at an amusement park under neon lighting	A photo of a butterfly with a lavender collar at an amusement park	A photo of 5 butterflies at an amusement park
An illustration of a helicopter moving at a skate park, in profile	An illustration of an orange helicopter at a skate park	An illustration of a helicopter at a skate park, shifted slightly downward	An illustration of a helicopter at a skate park, make it heart-shaped	An illustration of a helicopter sailing at a skate park
A watercolor painting of a backpack displayed on a rocky Mars landscape, top-down view	A watercolor painting of a backpack with a blue ribbon on a rocky Mars landscape	A watercolor painting of a backpack on a rocky Mars landscape with moody low-key lighting	A watercolor painting of a backpack on a rocky Mars landscape, shifted slightly upward	A watercolor painting of a backpack on a rocky Mars landscape, wide-angle view
An illustration of a runner sitting on a sunset beach, facing right	An illustration of a runner on a sunset beach with moody low-key lighting	An illustration of 5 runners on a sunset beach	An illustration of a runner on the moon surface	An illustration of a runner on a sunset beach, placed in the foreground
A photo of an astronaut dancing in a cyberpunk alley	A photo of an astronaut in a cyberpunk alley, facing forward	A photo of 3 astronauts in a cyberpunk alley	A photo of an astronaut in a cyberpunk alley under soft studio lighting	A photo of an astronaut jumping in a cyberpunk alley
A watercolor painting of a painter running in a castle hall with warm tungsten lighting, isometric view	A watercolor painting of 3 painters in a castle hall	A watercolor painting of a painter in a gold hat in a castle hall	A watercolor painting of a painter wearing gold glasses in a castle hall	A watercolor painting of a painter jumping in a castle hall
An illustration of a cake sitting in a sunrise field	An illustration of a cake with a gold logo in a sunrise field	An illustration of a cake in a sunrise field, facing forward	An illustration of a cake in a zen garden	An illustration of a cake in a sunrise field, placed in the background
An oil painting of a basketball player jumping by a riverbank with bright high-key lighting, facing forward	An oil painting of a basketball player by a riverbank, facing forward	An oil painting of a basketball player at sunrise in a meadow	An oil painting of a basketball player by a riverbank, shifted slightly upward	An oil painting of a basketball player juggling by a riverbank
An oil painting of a flower bush sitting inside a cave, facing right	An oil painting of a flower bush inside a cave under overcast light	An oil painting of a flower bush inside a cave, placed in the foreground	An oil painting of a flower bush with brown flowers inside a cave	An oil painting of a flower bush inside a cave, isometric view
A 3D render of a guitarist running on a lake pier	A 3D render of a guitarist on a lake pier, close-up	A 3D render of a guitarist in a neon-lit city at night	A 3D render of a guitarist surfing on a lake pier	A 3D render of a guitarist in a teal jacket on a lake pier
A 3D render of a vase displayed at a carnival, wide-angle view	A 3D render of 3 vases at a carnival	A 3D render of a vase at a carnival with moody low-key lighting	A 3D render of a gold vase at a carnival	A 3D render of a vase at a carnival, make it square-shaped
A watercolor painting of a smartphone placed underwater near a coral reef	A watercolor painting of a smartphone with a maroon logo underwater near a coral reef	A watercolor painting of a smartphone by a waterfall	A watercolor painting of a smartphone underwater near a coral reef backlit with a subtle rim light	A watercolor painting of a smartphone underwater near a coral reef, make it square-shaped
A watercolor painting of a bee walking on a rocky Mars landscape, overhead view	A watercolor painting of a bee on a rocky Mars landscape, placed in the background	A watercolor painting of a bee wearing a lavender bandana on a rocky Mars landscape	A watercolor painting of a bee running on a rocky Mars landscape	A watercolor painting of a bee with maroon feathers on a rocky Mars landscape
An illustration of a sand dune sitting on a soccer field	An illustration of a sand dune with green flowers on a soccer field	An illustration of a sand dune with 2 bronze lanterns hanging nearby on a soccer field	An illustration of a sand dune in a modern office	An illustration of a sand dune on a soccer field, top-down view
A 3D render of a coffee cup placed in a mountain meadow under soft studio lighting	A 3D render of a coffee cup in a mountain meadow, make it triangular	A 3D render of 2 coffee cups in a mountain meadow	A 3D render of a coffee cup in a mountain meadow, isometric view	A 3D render of a coffee cup in a mountain meadow with fluorescent indoor lighting
An illustration of a bicycle parked in an art studio with warm tungsten lighting	An illustration of a bicycle in an art studio, facing forward	An illustration of a bicycle in an art studio, make it triangular	An illustration of a bicycle in an art studio, shifted slightly downward	An illustration of a bicycle in an art studio with tiny fairy lights in the background
A photo of a fish swimming in a foggy forest	A photo of a fish in a foggy forest with tiny fairy lights in the background	A photo of 4 fish in a foggy forest	A photo of a fish with a magenta collar in a foggy forest	A photo of a fish with red shell in a foggy forest
A photo of a violin resting on a farm	A photo of a violin on a farm, centered	A photo of 2 violins on a farm	A photo of a lime violin on a farm	A photo of a violin on a farm with moody low-key lighting
A 3D render of a violin resting on a farm	A 3D render of a violin on a farm, facing forward	A 3D render of 4 violins on a farm	A 3D render of a violin with 2 lavender stickers on a farm	A 3D render of a violin on a farm, make it square-shaped
A watercolor painting of a bridge sitting underwater near a coral reef with tiny fairy lights in the background, facing left	A watercolor painting of a bridge with a green rainbow in the sky underwater near a coral reef	A watercolor painting of a bridge with bronze leaves underwater near a coral reef	A watercolor painting of a bridge underwater near a coral reef, overhead view	A watercolor painting of a bridge at a carnival
An oil painting of an umbrella placed on a sunset beach	An oil painting of a beige umbrella on a sunset beach	An oil painting of an umbrella with a maroon ribbon on a sunset beach	An oil painting of 3 umbrellas on a sunset beach	An oil painting of an umbrella on a sunset beach, shifted slightly upward
An illustration of a train taking off inside an airport terminal under neon lighting, isometric view	An illustration of a train with a black racing stripe inside an airport terminal	An illustration of a train inside an airport terminal, in profile	An illustration of a train landing inside an airport terminal	An illustration of a train in a desert with dunes
A photo of a waterfall sitting with a city skyline behind	A photo of a waterfall in a zen garden	A photo of a waterfall with a city skyline behind under overcast light	A photo of a waterfall with a blue rainbow in the sky with a city skyline behind	A photo of a waterfall with a city skyline behind, moved to the left side
A watercolor painting of a flower bush sitting in a classroom with bright high-key lighting	A watercolor painting of a flower bush with a brown rainbow in the sky in a classroom	A watercolor painting of a flower bush in a classroom, centered	A watercolor painting of a flower bush with red leaves in a classroom	A watercolor painting of 2 flower bushes in a classroom
A watercolor painting of a mountain sitting on a basketball court with warm tungsten lighting, wide-angle view	A watercolor painting of a mountain with a brown rainbow in the sky on a basketball court	A watercolor painting of 4 mountains on a basketball court	A watercolor painting of a mountain with orange flowers on a basketball court	A watercolor painting of a mountain on a basketball court, facing forward
A photo of a subway train moving in a classroom under soft studio lighting, overhead view	A photo of a subway train in a classroom, moved to the left side	A photo of a subway train inside a library	A photo of a subway train drifting in a classroom	A photo of 4 subway trains in a classroom
A 3D render of a dolphin diving on the moon with warm tungsten lighting	A 3D render of 4 dolphins on the moon	A 3D render of a dolphin leaping out of the water on the moon	A 3D render of a dolphin wearing magenta glasses on the moon	A 3D render of a dolphin on the moon, placed in the background
A photo of a potted plant placed on a beach under overcast light	A photo of a potted plant on a beach, wide-angle view	A photo of a potted plant on a beach, make it square-shaped	A photo of a potted plant on a beach, moved to the left side	A photo of a potted plant at a carnival
An oil painting of a truck sailing on a rooftop, wide-angle view	An oil painting of 4 trucks on a rooftop	An oil painting of a truck on a rooftop, make it square-shaped	An oil painting of a truck with 4 cyan balloons tied to it on a rooftop	An oil painting of a truck in a flower garden
An oil painting of a bee sleeping in a modern office, overhead view	An oil painting of a bee wearing teal glasses in a modern office	An oil painting of a bee in a modern office, wide-angle view	An oil painting of 5 bees in a modern office	An oil painting of a bee with bronze fur in a modern office
A 3D render of a dancer smiling on a neon-lit street at night	A 3D render of a dancer in a pink scarf on a neon-lit street at night	A 3D render of a dancer holding a bronze balloon on a neon-lit street at night	A 3D render of 4 dancers on a neon-lit street at night	A 3D render of a dancer by a waterfall
An illustration of a potted plant displayed with a city skyline behind	An illustration of a potted plant in a desert with dunes	An illustration of a teal potted plant with a city skyline behind	An illustration of a potted plant with a city skyline behind, make it round	An illustration of a potted plant with a city skyline behind, facing forward
An illustration of a sand dune sitting in a cyberpunk alley	An illustration of a sand dune in a cyberpunk alley, shifted slightly downward	An illustration of 3 sand dunes in a cyberpunk alley	An illustration of a sand dune in a cyberpunk alley, close-up	An illustration of a sand dune in a cyberpunk alley under soft studio lighting
A watercolor painting of a boat drifting inside a library	A watercolor painting of 3 boats inside a library	A watercolor painting of a boat with 2 pink stickers on the door inside a library	A watercolor painting of a boat inside a library, make it cylindrical	A watercolor painting of a boat inside a library, facing forward
A 3D render of a truck parked on a lake pier with warm tungsten lighting	A 3D render of a truck in a zen garden	A 3D render of 5 trucks on a lake pier	A 3D render of a truck on a lake pier with tiny fairy lights in the background	A 3D render of a truck on a lake pier, placed in the background
An illustration of an astronaut waving near a waterfall	An illustration of an astronaut near a waterfall, wide-angle view	An illustration of an astronaut holding a maroon guitar near a waterfall	An illustration of an astronaut on a space station	An illustration of an astronaut near a waterfall with warm tungsten lighting
An illustration of a tree standing on a lake pier, wide-angle view	An illustration of 2 trees on a lake pier	An illustration of a tree with 1 pink birds in the branches on a lake pier	An illustration of a tree on the moon surface	An illustration of a tree on a lake pier, shifted slightly downward
An oil painting of a bridge sitting at an amusement park with fluorescent indoor lighting, overhead view	An oil painting of a bridge with a red rainbow in the sky at an amusement park	An oil painting of a bridge at an amusement park backlit with a subtle rim light	An oil painting of a bridge in a foggy forest	An oil painting of a bridge at an amusement park, shifted slightly downward
A 3D render of a chef reading on a lake pier	A 3D render of a chef on a lake pier, top-down view	A 3D render of a chef on a lake pier, moved to the left side	A 3D render of a chef in a desert with dunes	A 3D render of a chef wearing a white hat on a lake pier
A watercolor painting of a sushi platter sitting on a soccer field with bright high-key lighting	A watercolor painting of a sushi platter on a soccer field, wide-angle view	A watercolor painting of a sushi platter on a soccer field, make it heart-shaped	A watercolor painting of a sushi platter on a soccer field with moody low-key lighting	A watercolor painting of a sushi platter on a beach at sunset
An oil painting of a bicycle flying on a lake pier, facing forward	An oil painting of a bicycle on a lake pier, facing forward	An oil painting of a bicycle on a beach at sunset	An oil painting of a black bicycle on a lake pier	An oil painting of a bicycle on a lake pier, moved to the right side
An illustration of a photographer running in a sci-fi corridor, in profile	An illustration of a photographer in a desert with dunes	An illustration of a photographer in a sci-fi corridor with tiny fairy lights in the background	An illustration of a photographer playing guitar in a sci-fi corridor	An illustration of a photographer in a gold shirt in a sci-fi corridor
An oil painting of a squirrel standing in a city street	An oil painting of a squirrel in a city street, shifted slightly upward	An oil painting of a squirrel in a city street with warm tungsten lighting	An oil painting of a squirrel sleeping in a city street	An oil painting of a squirrel in a cozy kitchen
An illustration of a train landing in a foggy forest, close-up	An illustration of a train in a foggy forest, shifted slightly upward	An illustration of a train with 1 navy stickers on the door in a foggy forest	An illustration of a train in a foggy forest backlit with a subtle rim light	An illustration of a train in a neon-lit city at night
An oil painting of a flower bush sitting in a sunrise field under overcast light	An oil painting of a flower bush in a sunrise field under neon lighting	An oil painting of a flower bush in a sunrise field, overhead view	An oil painting of a flower bush with a purple rainbow in the sky in a sunrise field	An oil painting of a flower bush with cyan leaves in a sunrise field
A 3D render of a waterfall sitting inside a cave, facing right	A 3D render of a waterfall on the moon surface	A 3D render of a waterfall with 3 cyan lanterns hanging nearby inside a cave	A 3D render of 3 waterfalls inside a cave	A 3D render of a waterfall inside a cave with warm tungsten lighting
A watercolor painting of a watch displayed in a forest with moody low-key lighting, in profile	A watercolor painting of a watch on a snowy mountain	A watercolor painting of a watch in a forest, placed in the foreground	A watercolor painting of a watch with a lavender ribbon in a forest	A watercolor painting of a watch in a forest, isometric view
A photo of a subway train sailing on a sunset beach, wide-angle view	A photo of a subway train with a black roof rack on a sunset beach	A photo of a subway train landing on a sunset beach	A photo of a subway train in a foggy forest	A photo of a subway train on a sunset beach, moved to the right side
A watercolor painting of an astronaut skating on a lake pier	A watercolor painting of an astronaut on a lake pier, close-up	A watercolor painting of an astronaut on a lake pier, placed in the background	A watercolor painting of an astronaut in a cyan dress on a lake pier	A watercolor painting of an astronaut surfing on a lake pier
A 3D render of a skateboard displayed in outer space	A 3D render of a skateboard in outer space, top-down view	A 3D render of a skateboard in outer space, make it square-shaped	A 3D render of a skateboard in outer space backlit with a subtle rim light	A 3D render of a skateboard with a gold logo in outer space
A photo of a coffee cup sitting on a rocky Mars landscape, wide-angle view	A photo of a coffee cup on a rocky Mars landscape backlit with a subtle rim light	A photo of a coffee cup with a lime ribbon on a rocky Mars landscape	A photo of a gold coffee cup on a rocky Mars landscape	A photo of a coffee cup on a rocky Mars landscape, make it cylindrical
A photo of a pagoda standing in a cozy kitchen under soft studio lighting, isometric view	A photo of 5 pagodas in a cozy kitchen	A photo of a pagoda in a cozy kitchen, shifted slightly upward	A photo of a pagoda on a beach at sunset	A photo of a pagoda in a cozy kitchen, wide-angle view
A photo of a lion walking near a waterfall with fluorescent indoor lighting	A photo of a lion near a waterfall, placed in the background	A photo of a lion in a neon-lit city at night	A photo of a lion wearing maroon glasses near a waterfall	A photo of a lion near a waterfall under neon lighting
A photo of a motorcycle taking off at an open-air market, overhead view	A photo of a motorcycle at an open-air market with moody low-key lighting	A photo of a motorcycle with a red roof rack at an open-air market	A photo of a motorcycle at an open-air market, shifted slightly downward	A photo of a green motorcycle at an open-air market
A photo of a cat sitting in outer space under golden-hour lighting	A photo of a cat in outer space, in profile	A photo of a cat in outer space under neon lighting	A photo of a cat in outer space, placed in the background	A photo of a cat sleeping in outer space
An oil painting of a lighthouse standing in an art studio	An oil painting of a lighthouse in an art studio under golden-hour lighting	An oil painting of a lighthouse on a rainy street	An oil painting of a lighthouse with magenta flowers in an art studio	An oil painting of a lighthouse in an art studio, close-up
A photo of a windmill standing on a farm, facing right	A photo of a windmill on a farm, shifted slightly upward	A photo of a windmill on a farm with fluorescent indoor lighting	A photo of 5 windmills on a farm	A photo of a windmill on a lake pier
An illustration of a guitar sitting on the moon, facing right	An illustration of a guitar with a magenta logo on the moon	An illustration of a guitar at a carnival	An illustration of a guitar on the moon under neon lighting	An illustration of a teal guitar on the moon
A 3D render of an astronaut smiling on a rocky Mars landscape with fluorescent indoor lighting, close-up	A 3D render of 5 astronauts on a rocky Mars landscape	A 3D render of an astronaut on a rocky Mars landscape under neon lighting	A 3D render of an astronaut in a flower garden	A 3D render of an astronaut on a rocky Mars landscape, close-up
A 3D render of a lizard playing in a garden	A 3D render of a lizard in a garden with warm tungsten lighting	A 3D render of 2 lizards in a garden	A 3D render of a lizard with cyan fur in a garden	A 3D render of a lizard in a garden, top-down view
A photo of a burger displayed at an amusement park under overcast light, in profile	A photo of a burger at an amusement park, shifted slightly upward	A photo of a lavender burger at an amusement park	A photo of 3 burgers at an amusement park	A photo of a burger at an amusement park with bright high-key lighting
An oil painting of a castle sitting on a music stage with moody low-key lighting	An oil painting of 3 castles on a music stage	An oil painting of a castle in a cozy kitchen	An oil painting of a castle on a music stage, wide-angle view	An oil painting of a castle on a music stage, placed in the foreground
A watercolor painting of a runner jumping in a medieval village with moody low-key lighting, overhead view	A watercolor painting of a runner in a medieval village with moody low-key lighting	A watercolor painting of a runner typing in a medieval village	A watercolor painting of a runner in a medieval village, placed in the background	A watercolor painting of a runner inside a library
A watercolor painting of a motorcycle moving near a waterfall, wide-angle view	A watercolor painting of a motorcycle near a waterfall under overcast light	A watercolor painting of 5 motorcycles near a waterfall	A watercolor painting of a motorcycle near a waterfall, moved to the right side	A watercolor painting of a motorcycle with a red decal near a waterfall
A 3D render of a tree standing in a snowy field with warm tungsten lighting, close-up	A 3D render of 3 trees in a snowy field	A 3D render of a tree in a flower garden	A 3D render of a tree with a maroon rainbow in the sky in a snowy field	A 3D render of a tree in a snowy field, moved to the right side
A watercolor painting of a bee lying down inside an airport terminal backlit with a subtle rim light, facing right	A watercolor painting of a bee inside an airport terminal, overhead view	A watercolor painting of a bee on a snowy mountain	A watercolor painting of a bee wearing a white cape inside an airport terminal	A watercolor painting of a bee sitting inside an airport terminal
A watercolor painting of an astronaut typing in an art studio under overcast light	A watercolor painting of 3 astronauts in an art studio	A watercolor painting of an astronaut in an art studio under neon lighting	A watercolor painting of an astronaut in an art studio, shifted slightly upward	A watercolor painting of an astronaut in a green scarf in an art studio
A watercolor painting of a painter playing guitar on a music stage	A watercolor painting of a painter on a music stage, wide-angle view	A watercolor painting of a painter holding a pink camera on a music stage	A watercolor painting of a painter on a music stage, moved to the right side	A watercolor painting of 3 painters on a music stage
An illustration of a subway train moving at a train station, facing forward	An illustration of an orange subway train at a train station	An illustration of a subway train at a train station, in profile	An illustration of a subway train at a train station, shifted slightly upward	An illustration of a subway train at a train station, make it triangular
A photo of a clock placed on a farm, facing forward	A photo of a white clock on a farm	A photo of a clock on a farm, make it round	A photo of a clock on a farm with warm tungsten lighting	A photo of a clock on a farm, top-down view
A watercolor painting of a helicopter flying in a sci-fi corridor, facing left	A watercolor painting of a helicopter sailing in a sci-fi corridor	A watercolor painting of a helicopter in a modern office	A watercolor painting of a helicopter in a sci-fi corridor, placed in the background	A watercolor painting of a helicopter with 2 brown stickers on the door in a sci-fi corridor
A photo of a helicopter racing in a castle hall	A photo of a helicopter in a castle hall, top-down view	A photo of a silver helicopter in a castle hall	A photo of a helicopter on a lake pier	A photo of a helicopter in a castle hall, shifted slightly downward
A photo of a potted plant sitting in a cozy kitchen with warm tungsten lighting, wide-angle view	A photo of a potted plant in a zen garden	A photo of a potted plant in a cozy kitchen, moved to the left side	A photo of a magenta potted plant in a cozy kitchen	A photo of a potted plant in a cozy kitchen under soft studio lighting
An illustration of a vase displayed in a sunrise field, top-down view	An illustration of a vase with a red ribbon in a sunrise field	An illustration of a vase in a sunrise field, make it triangular	An illustration of a vase in a sunrise field, moved to the left side	An illustration of 3 vases in a sunrise field
A 3D render of a violinist dancing in a snowy field	A 3D render of a violinist on a lake pier	A 3D render of a violinist in a maroon hat in a snowy field	A 3D render of 4 violinists in a snowy field	A 3D render of a violinist surfing in a snowy field
An illustration of a boat parked at a carnival under soft studio lighting, isometric view	An illustration of a boat on a space station	An illustration of 5 boats at a carnival	An illustration of a boat at a carnival, overhead view	An illustration of a boat at a carnival with bright high-key lighting
An illustration of a pagoda standing on a neon-lit street at night	An illustration of a pagoda on a neon-lit street at night, moved to the right side	An illustration of a pagoda on a beach at sunset	An illustration of 4 pagodas on a neon-lit street at night	An illustration of a pagoda painted navy on a neon-lit street at night
A photo of a train racing on a rooftop, facing left	A photo of a train on a rooftop, shifted slightly upward	A photo of a train on a rooftop, make it triangular	A photo of 5 trains on a rooftop	A photo of a teal train on a rooftop
An illustration of an umbrella placed underwater near a coral reef	An illustration of an umbrella with a maroon logo underwater near a coral reef	An illustration of an umbrella underwater near a coral reef, overhead view	An illustration of a purple umbrella underwater near a coral reef	An illustration of an umbrella underwater near a coral reef, make it heart-shaped
A photo of a flower bush sitting on a lake pier	A photo of a flower bush in a flower garden	A photo of a flower bush on a lake pier, moved to the right side	A photo of a flower bush on a lake pier, isometric view	A photo of a flower bush on a lake pier with moody low-key lighting
A watercolor painting of a motorcycle taking off on the moon	A watercolor painting of a motorcycle with a blue racing stripe on the moon	A watercolor painting of a motorcycle on the moon under golden-hour lighting	A watercolor painting of 2 motorcycles on the moon	A watercolor painting of a motorcycle by a waterfall
An oil painting of a butterfly sleeping by a riverbank	An oil painting of a butterfly on the moon surface	An oil painting of a butterfly by a riverbank, wide-angle view	An oil painting of 4 butterflies by a riverbank	An oil painting of a butterfly playing by a riverbank
An oil painting of a bus landing inside a cave under golden-hour lighting	An oil painting of a white bus inside a cave	An oil painting of 2 buses inside a cave	An oil painting of a bus with 1 bronze balloons tied to it inside a cave	An oil painting of a bus in a flower garden
An oil painting of a truck landing on a neon-lit street at night, facing right	An oil painting of a lime truck on a neon-lit street at night	An oil painting of a truck parked on a neon-lit street at night	An oil painting of 4 trucks on a neon-lit street at night	An oil painting of a truck on a neon-lit street at night, moved to the right side
A 3D render of a rabbit standing in a city street, close-up	A 3D render of a rabbit with silver fur in a city street	A 3D render of a rabbit at sunrise in a meadow	A 3D render of a rabbit in a city street, isometric view	A 3D render of a rabbit playing in a city street
An oil painting of a sailboat sailing by a riverbank backlit with a subtle rim light, facing forward	An oil painting of 3 sailboats by a riverbank	An oil painting of a sailboat with a lavender racing stripe by a riverbank	An oil painting of a sailboat by a riverbank, make it triangular	An oil painting of a sailboat by a riverbank with fluorescent indoor lighting
A 3D render of a dog sleeping in a sunrise field	A 3D render of a dog underwater near coral	A 3D render of a dog in a sunrise field, shifted slightly upward	A 3D render of a dog in a sunrise field, isometric view	A 3D render of 3 dogs in a sunrise field
An oil painting of a cake standing at a train station, in profile	An oil painting of a cake in a flower garden	An oil painting of a cake at a train station, shifted slightly downward	An oil painting of a cake at a train station under overcast light	An oil painting of a bronze cake at a train station
An illustration of a guitarist playing guitar at an open-air market, overhead view	An illustration of a guitarist at an open-air market, moved to the left side	An illustration of a guitarist at an open-air market, top-down view	An illustration of a guitarist in a orange scarf at an open-air market	An illustration of a guitarist at an open-air market with bright high-key lighting
An illustration of a runner taking a photo on a music stage	An illustration of a runner on a music stage under golden-hour lighting	An illustration of a runner on a music stage, moved to the left side	An illustration of a runner in a maroon shirt on a music stage	An illustration of 4 runners on a music stage
A 3D render of a motorcycle sailing on a neon-lit street at night	A 3D render of a red motorcycle on a neon-lit street at night	A 3D render of a motorcycle with 3 cyan stickers on the door on a neon-lit street at night	A 3D render of a motorcycle at a carnival	A 3D render of a motorcycle on a neon-lit street at night, overhead view
A 3D render of a cake resting in a cozy kitchen	A 3D render of 4 cakes in a cozy kitchen	A 3D render of a cake in a cozy kitchen with warm tungsten lighting	A 3D render of a cake in a cozy kitchen, make it round	A 3D render of a white cake in a cozy kitchen
A 3D render of a chair displayed at a skate park	A 3D render of a chair at a skate park, make it triangular	A 3D render of 4 chairs at a skate park	A 3D render of a chair at a skate park, facing forward	A 3D render of a chair at a skate park, moved to the right side
A 3D render of a pagoda standing in a classroom with bright high-key lighting, facing left	A 3D render of a pagoda in a classroom, top-down view	A 3D render of a pagoda painted bronze in a classroom	A 3D render of a pagoda in a classroom with tiny fairy lights in the background	A 3D render of a pagoda in a neon-lit city at night
An illustration of a fox lying down on a rocky Mars landscape, close-up	An illustration of a fox on a rocky Mars landscape, moved to the right side	An illustration of a fox sitting on a rocky Mars landscape	An illustration of 5 foxes on a rocky Mars landscape	An illustration of a fox underwater near coral
A 3D render of a photographer reading at a skate park	A 3D render of a photographer at a skate park, facing forward	A 3D render of 5 photographers at a skate park	A 3D render of a photographer in a foggy forest	A 3D render of a photographer at a skate park with warm tungsten lighting
A photo of a vase placed on a beach	A photo of a yellow vase on a beach	A photo of a vase on a beach, close-up	A photo of a vase with 5 teal stickers on a beach	A photo of a vase on the moon surface
A 3D render of a smartphone sitting at a cafe	A 3D render of a smartphone at a cafe, shifted slightly downward	A 3D render of a smartphone at a cafe, close-up	A 3D render of a smartphone at a cafe, make it round	A 3D render of 4 smartphones at a cafe
An oil painting of a waterfall sitting in a snowy field under golden-hour lighting	An oil painting of 5 waterfalls in a snowy field	An oil painting of a waterfall with a magenta rainbow in the sky in a snowy field	An oil painting of a waterfall in a snowy field, top-down view	An oil painting of a waterfall painted pink in a snowy field
An oil painting of a soccer player doing a yoga pose near a waterfall with fluorescent indoor lighting, wide-angle view	An oil painting of 2 soccer players near a waterfall	An oil painting of a soccer player sitting near a waterfall	An oil painting of a soccer player in a cyan scarf near a waterfall	An oil painting of a soccer player holding a magenta coffee cup near a waterfall
A photo of a turtle swimming in outer space, facing forward	A photo of a turtle swimming in outer space	A photo of a turtle in outer space with bright high-key lighting	A photo of a turtle wearing a teal bandana in outer space	A photo of 4 turtles in outer space
A photo of an umbrella placed in a zen garden with tiny fairy lights in the background, facing left	A photo of an umbrella with 2 green stickers in a zen garden	A photo of an umbrella in a cozy kitchen	A photo of an umbrella in a zen garden, moved to the left side	A photo of a yellow umbrella in a zen garden
A watercolor painting of a photographer sitting in a forest, close-up	A watercolor painting of a photographer in a forest, facing forward	A watercolor painting of 2 photographers in a forest	A watercolor painting of a photographer skating in a forest	A watercolor painting of a photographer in a forest under neon lighting
An oil painting of a violinist typing in a cyberpunk alley backlit with a subtle rim light	An oil painting of a violinist in a neon-lit city at night	An oil painting of a violinist in a cyberpunk alley, wide-angle view	An oil painting of a violinist in a cyberpunk alley with tiny fairy lights in the background	An oil painting of a violinist in a silver shirt in a cyberpunk alley
A photo of a motorcycle drifting at a carnival, isometric view	A photo of a motorcycle on a space station	A photo of a motorcycle at a carnival under neon lighting	A photo of a brown motorcycle at a carnival	A photo of a motorcycle with 2 blue stickers on the door at a carnival
A watercolor painting of a book sitting in a zen garden with moody low-key lighting	A watercolor painting of 5 books in a zen garden	A watercolor painting of a book in a zen garden under neon lighting	A watercolor painting of a book on a beach at sunset	A watercolor painting of a navy book in a zen garden
A watercolor painting of a bus moving at a train station under soft studio lighting, in profile	A watercolor painting of a bus at a train station with fluorescent indoor lighting	A watercolor painting of a lime bus at a train station	A watercolor painting of 3 buses at a train station	A watercolor painting of a bus racing at a train station
A watercolor painting of a bear sleeping at an open-air market	A watercolor painting of a bear at an open-air market, placed in the background	A watercolor painting of a bear playing at an open-air market	A watercolor painting of a bear wearing a bronze scarf at an open-air market	A watercolor painting of a bear in a desert with dunes
A 3D render of an astronaut jumping at a skate park with moody low-key lighting, close-up	A 3D render of an astronaut wearing a lime hat at a skate park	A 3D render of an astronaut at a skate park, in profile	A 3D render of an astronaut at a skate park with moody low-key lighting	A 3D render of an astronaut reading at a skate park
A photo of a helicopter parked on a music stage	A photo of a bronze helicopter on a music stage	A photo of a helicopter underwater near coral	A photo of a helicopter on a music stage under golden-hour lighting	A photo of 5 helicopters on a music stage
A watercolor painting of a soccer player jumping inside an airport terminal under soft studio lighting	A watercolor painting of a soccer player inside an airport terminal under golden-hour lighting	A watercolor painting of a soccer player inside an airport terminal, overhead view	A watercolor painting of a soccer player in a zen garden	A watercolor painting of 3 soccer players inside an airport terminal
A photo of a cyclist playing guitar at an amusement park	A photo of a cyclist at an amusement park with fluorescent indoor lighting	A photo of a cyclist carrying a black backpack at an amusement park	A photo of a cyclist at an amusement park, in profile	A photo of a cyclist on a space station
An illustration of a car parked in a modern office, in profile	An illustration of a car with a lavender decal in a modern office	An illustration of 2 cars in a modern office	An illustration of a car in a modern office, facing right	An illustration of a car in a modern office, moved to the right side
A photo of a lighthouse standing in a snowy field with tiny fairy lights in the background	A photo of a lighthouse in a zen garden	A photo of a lighthouse in a snowy field with fluorescent indoor lighting	A photo of a lighthouse with a magenta rainbow in the sky in a snowy field	A photo of a lighthouse with white flowers in a snowy field
A 3D render of a hiker doing a yoga pose under a thunderstorm sky, in profile	A 3D render of a hiker taking a photo under a thunderstorm sky	A 3D render of 5 hikers under a thunderstorm sky	A 3D render of a hiker in a maroon hat under a thunderstorm sky	A 3D render of a hiker under a thunderstorm sky, moved to the left side
A watercolor painting of a bridge sitting on a soccer field, top-down view	A watercolor painting of a bridge on a soccer field, in profile	A watercolor painting of a bridge with 1 lime lanterns hanging nearby on a soccer field	A watercolor painting of a bridge on a soccer field under overcast light	A watercolor painting of a bridge with cyan flowers on a soccer field
An oil painting of a cat running in a mountain meadow, in profile	An oil painting of a cat lying down in a mountain meadow	An oil painting of a cat in a mountain meadow with tiny fairy lights in the background	An oil painting of a cat in a mountain meadow, in profile	An oil painting of a cat wearing a beige bandana in a mountain meadow
A 3D render of a truck drifting on a rooftop, facing right	A 3D render of 5 trucks on a rooftop	A 3D render of a truck on a rooftop, make it heart-shaped	A 3D render of a truck on a rooftop with bright high-key lighting	A 3D render of a truck underwater near coral
A photo of an airplane taking off near a waterfall	A photo of 3 airplanes near a waterfall	A photo of an airplane near a waterfall, make it heart-shaped	A photo of an airplane in a flower garden	A photo of an airplane with a purple racing stripe near a waterfall
An oil painting of a flower bush sitting with a city skyline behind, isometric view	An oil painting of a flower bush with 3 gold butterflies around with a city skyline behind	An oil painting of a flower bush with cyan flowers with a city skyline behind	An oil painting of 4 flower bushes with a city skyline behind	An oil painting of a flower bush with a city skyline behind under soft studio lighting
A 3D render of a helicopter flying in a castle hall with warm tungsten lighting, isometric view	A 3D render of a helicopter with a gold decal in a castle hall	A 3D render of a helicopter in a castle hall backlit with a subtle rim light	A 3D render of 2 helicopters in a castle hall	A 3D render of a helicopter in a castle hall, centered
A photo of a candle standing on a rooftop	A photo of 2 candles on a rooftop	A photo of a candle underwater near coral	A photo of a candle with a black ribbon on a rooftop	A photo of a candle on a rooftop under overcast light
An illustration of a parrot flying in a sunrise field, overhead view	An illustration of a parrot in a sunrise field, overhead view	An illustration of a parrot in a sunrise field with tiny fairy lights in the background	An illustration of a parrot on a lake pier	An illustration of a parrot wearing a black scarf in a sunrise field
A photo of a truck moving in a city street under overcast light	A photo of a truck on a beach at sunset	A photo of a truck in a city street, make it square-shaped	A photo of a truck in a city street under neon lighting	A photo of a truck in a city street, facing right
A 3D render of a horse playing inside an airport terminal	A 3D render of a horse inside an airport terminal, centered	A 3D render of a horse inside an airport terminal, isometric view	A 3D render of a horse with a bronze collar inside an airport terminal	A 3D render of a horse at sunrise in a meadow
An illustration of a burger sitting in a classroom with bright high-key lighting	An illustration of a burger at sunrise in a meadow	An illustration of a burger in a classroom backlit with a subtle rim light	An illustration of a burger with a magenta ribbon in a classroom	An illustration of a white burger in a classroom
A watercolor painting of a lighthouse standing in a city street, facing left	A watercolor painting of a lighthouse on a rainy street	A watercolor painting of a lighthouse painted green in a city street	A watercolor painting of a lighthouse in a city street, wide-angle view	A watercolor painting of a lighthouse with 2 green lanterns hanging nearby in a city street
A photo of a castle sitting in a foggy forest	A photo of a castle in a foggy forest with tiny fairy lights in the background	A photo of a castle in a foggy forest, shifted slightly upward	A photo of a castle in a foggy forest, in profile	A photo of a castle on a rainy street
A watercolor painting of a drone landing in a cyberpunk alley	A watercolor painting of a drone in a cyberpunk alley, moved to the left side	A watercolor painting of a drone in a cyberpunk alley backlit with a subtle rim light	A watercolor painting of a drone in a cyberpunk alley, make it heart-shaped	A watercolor painting of a drone on a rainy street
An illustration of a sand dune sitting in a temple courtyard with warm tungsten lighting, in profile	An illustration of a sand dune in a temple courtyard, isometric view	An illustration of a sand dune with yellow flowers in a temple courtyard	An illustration of a sand dune with a cyan rainbow in the sky in a temple courtyard	An illustration of a sand dune in a zen garden
A 3D render of a whale swimming on a beach under neon lighting	A 3D render of 5 whales on a beach	A 3D render of a whale on a beach, shifted slightly upward	A 3D render of a whale diving on a beach	A 3D render of a whale on a beach with bright high-key lighting
A photo of a soccer player running in a desert with fluorescent indoor lighting	A photo of a soccer player holding a green balloon in a desert	A photo of a soccer player in a purple scarf in a desert	A photo of a soccer player on a snowy mountain	A photo of a soccer player in a desert backlit with a subtle rim light
An illustration of a flower bush sitting inside a cave	An illustration of a flower bush with yellow flowers inside a cave	An illustration of a flower bush inside a cave, overhead view	An illustration of a flower bush inside a cave, placed in the foreground	An illustration of a flower bush inside a cave under golden-hour lighting
An oil painting of a truck racing on a beach, facing left	An oil painting of 2 trucks on a beach	An oil painting of a truck on a snowy mountain	An oil painting of a truck parked on a beach	An oil painting of a truck with a bronze racing stripe on a beach
A photo of a waterfall sitting in outer space under neon lighting, overhead view	A photo of a waterfall in outer space, facing forward	A photo of a waterfall in outer space with warm tungsten lighting	A photo of a waterfall with 2 yellow birds in the branches in outer space	A photo of a waterfall in outer space, placed in the foreground
An oil painting of a painting displayed at a train station under overcast light, close-up	An oil painting of a blue painting at a train station	An oil painting of a painting with 5 yellow stickers at a train station	An oil painting of a painting on a space station	An oil painting of 2 paintings at a train station
A watercolor painting of a watch sitting in a foggy forest, top-down view	A watercolor painting of a watch inside a library	A watercolor painting of 4 watches in a foggy forest	A watercolor painting of a watch in a foggy forest, wide-angle view	A watercolor painting of a watch with a white logo in a foggy forest
An oil painting of a drone racing on a music stage under soft studio lighting	An oil painting of a drone with 2 pink stickers on the door on a music stage	An oil painting of a drone on a music stage, shifted slightly upward	An oil painting of a drone flying on a music stage	An oil painting of 4 drones on a music stage
A photo of a book standing on a basketball court with warm tungsten lighting	A photo of a book on a basketball court, shifted slightly upward	A photo of a book at a carnival	A photo of a book on a basketball court, make it round	A photo of a book with 4 green stickers on a basketball court
A watercolor painting of a waterfall sitting at a skate park, facing right	A watercolor painting of a waterfall at a skate park, placed in the foreground	A watercolor painting of 5 waterfalls at a skate park	A watercolor painting of a waterfall at a skate park, overhead view	A watercolor painting of a waterfall at a skate park under golden-hour lighting
An oil painting of a painter typing in a garden, facing right	An oil painting of a painter in a garden, facing left	An oil painting of a painter on a rainy street	An oil painting of a painter skating in a garden	An oil painting of 4 painters in a garden
A watercolor painting of a frog sitting in a castle hall with bright high-key lighting	A watercolor painting of a frog with gold scales in a castle hall	A watercolor painting of 2 frogs in a castle hall	A watercolor painting of a frog playing in a castle hall	A watercolor painting of a frog wearing blue glasses in a castle hall
An oil painting of a lighthouse standing in a mountain meadow, overhead view	An oil painting of a lighthouse with beige flowers in a mountain meadow	An oil painting of a lighthouse in a mountain meadow, placed in the background	An oil painting of a lighthouse with 1 teal lanterns hanging nearby in a mountain meadow	An oil painting of a lighthouse in a mountain meadow, in profile
A 3D render of a violin displayed on a beach under soft studio lighting	A 3D render of a violin on a beach, centered	A 3D render of a violin on a beach, close-up	A 3D render of a pink violin on a beach	A 3D render of a violin with 1 beige stickers on a beach
A photo of a cat playing on a soccer field, isometric view	A photo of a cat with magenta feathers on a soccer field	A photo of 5 cats on a soccer field	A photo of a cat on a soccer field, placed in the foreground	A photo of a cat wearing a magenta hat on a soccer field
A watercolor painting of a motorcycle taking off on a soccer field under soft studio lighting	A watercolor painting of a motorcycle moving on a soccer field	A watercolor painting of a motorcycle on a soccer field, shifted slightly upward	A watercolor painting of a motorcycle on a soccer field, isometric view	A watercolor painting of an orange motorcycle on a soccer field
An oil painting of a turtle diving at a train station with fluorescent indoor lighting, in profile	An oil painting of a turtle with blue shell at a train station	An oil painting of a turtle at a train station, moved to the right side	An oil painting of a turtle wearing a gold scarf at a train station	An oil painting of 2 turtles at a train station
A watercolor painting of a clock sitting on a beach, facing forward	A watercolor painting of a clock on a beach, facing right	A watercolor painting of a clock on a beach, make it heart-shaped	A watercolor painting of a clock with a brown logo on a beach	A watercolor painting of a clock inside a library
An oil painting of an airplane sailing on a rooftop under golden-hour lighting	An oil painting of 2 airplanes on a rooftop	An oil painting of an airplane on a rooftop with tiny fairy lights in the background	An oil painting of an airplane on a rooftop, make it square-shaped	An oil painting of a silver airplane on a rooftop
A photo of a wolf lying down in a forest, facing left	A photo of a wolf in a forest, facing right	A photo of a wolf in a forest, placed in the background	A photo of a wolf walking in a forest	A photo of a wolf wearing a yellow cape in a forest
A photo of a castle sitting in a zen garden with warm tungsten lighting	A photo of a castle in a zen garden backlit with a subtle rim light	A photo of 3 castles in a zen garden	A photo of a castle with a lime rainbow in the sky in a zen garden	A photo of a castle with lavender leaves in a zen garden
An oil painting of a camera resting on a neon-lit street at night, overhead view	An oil painting of a camera on a neon-lit street at night, placed in the background	An oil painting of a camera with a yellow logo on a neon-lit street at night	An oil painting of 5 cameras on a neon-lit street at night	An oil painting of a camera on a neon-lit street at night, make it square-shaped
A 3D render of a motorcycle landing inside a library	A 3D render of 4 motorcycles inside a library	A 3D render of a motorcycle inside a library with moody low-key lighting	A 3D render of a motorcycle underwater near coral	A 3D render of a gold motorcycle inside a library
A 3D render of a guitarist surfing in a foggy forest under overcast light, isometric view	A 3D render of a guitarist in a foggy forest with tiny fairy lights in the background	A 3D render of a guitarist in a desert with dunes	A 3D render of a guitarist in a foggy forest, moved to the right side	A 3D render of a guitarist in a foggy forest, isometric view
An illustration of a sand dune sitting at an amusement park with tiny fairy lights in the background, overhead view	An illustration of a sand dune at an amusement park, moved to the right side	An illustration of a sand dune with bronze flowers at an amusement park	An illustration of a sand dune with 2 yellow lanterns hanging nearby at an amusement park	An illustration of a sand dune at an amusement park with tiny fairy lights in the background
An oil painting of a lion sleeping in a sci-fi corridor with moody low-key lighting, wide-angle view	An oil painting of a lion running in a sci-fi corridor	An oil painting of a lion in a cozy kitchen	An oil painting of a lion in a sci-fi corridor with warm tungsten lighting	An oil painting of a lion wearing navy glasses in a sci-fi corridor
An illustration of a dancer smiling in a sunrise field	An illustration of 5 dancers in a sunrise field	An illustration of a dancer in a orange scarf in a sunrise field	An illustration of a dancer in a sunrise field, facing forward	An illustration of a dancer in a sunrise field with fluorescent indoor lighting
A 3D render of a cake resting on a rocky Mars landscape with warm tungsten lighting, facing right	A 3D render of a cake in a modern office	A 3D render of 4 cakes on a rocky Mars landscape	A 3D render of a cake on a rocky Mars landscape, placed in the foreground	A 3D render of a cake on a rocky Mars landscape backlit with a subtle rim light
A photo of a lizard jumping in a castle hall	A photo of a lizard in a flower garden	A photo of a lizard wearing a green hat in a castle hall	A photo of a lizard in a castle hall, shifted slightly upward	A photo of 4 lizards in a castle hall
An oil painting of a deer standing at an open-air market under golden-hour lighting	An oil painting of a deer jumping at an open-air market	An oil painting of a deer with brown scales at an open-air market	An oil painting of 3 deer at an open-air market	An oil painting of a deer wearing green glasses at an open-air market
An oil painting of a truck racing on a basketball court	An oil painting of a truck on a basketball court, placed in the background	An oil painting of a truck parked on a basketball court	An oil painting of 3 trucks on a basketball court	An oil painting of a truck in a foggy forest
An oil painting of a photographer dancing at an open-air market	An oil painting of 5 photographers at an open-air market	An oil painting of a photographer in a black scarf at an open-air market	An oil painting of a photographer in a cozy kitchen	An oil painting of a photographer at an open-air market, wide-angle view
An illustration of a tree standing on a farm	An illustration of a tree on a farm, overhead view	An illustration of a tree in a zen garden	An illustration of a tree on a farm with moody low-key lighting	An illustration of a tree with maroon leaves on a farm
A 3D render of a pagoda standing in a cyberpunk alley	A 3D render of a pagoda in a cyberpunk alley with moody low-key lighting	A 3D render of 4 pagodas in a cyberpunk alley	A 3D render of a pagoda in a cyberpunk alley, facing left	A 3D render of a pagoda in a cyberpunk alley, moved to the left side
A 3D render of a turtle diving in a snowy field under golden-hour lighting	A 3D render of a turtle in a modern office	A 3D render of a turtle wearing a yellow bandana in a snowy field	A 3D render of 5 turtles in a snowy field	A 3D render of a turtle diving in a snowy field
A watercolor painting of a castle sitting in a sci-fi corridor, facing left	A watercolor painting of a castle with maroon flowers in a sci-fi corridor	A watercolor painting of a castle underwater near coral	A watercolor painting of a castle in a sci-fi corridor, facing right	A watercolor painting of 2 castles in a sci-fi corridor
An illustration of a painter playing guitar in a medieval village	An illustration of a painter painting in a medieval village	An illustration of a painter in a desert with dunes	An illustration of a painter in a medieval village, shifted slightly upward	An illustration of a painter holding a yellow microphone in a medieval village
A 3D render of a skateboarder posing on a soccer field	A 3D render of a skateboarder in a navy hat on a soccer field	A 3D render of a skateboarder surfing on a soccer field	A 3D render of a skateboarder on a soccer field under neon lighting	A 3D render of a skateboarder on a soccer field, placed in the foreground
A photo of a castle sitting on a music stage	A photo of a castle with pink leaves on a music stage	A photo of a castle on the moon surface	A photo of a castle on a music stage under neon lighting	A photo of a castle with 1 black butterflies around on a music stage
An oil painting of a sneakers displayed inside a cave under soft studio lighting	An oil painting of a sneakers inside a cave, make it round	An oil painting of a bronze sneakers inside a cave	An oil painting of a sneakers inside a cave with tiny fairy lights in the background	An oil painting of a sneakers with a lavender ribbon inside a cave
A watercolor painting of a soccer player jumping in a forest, wide-angle view	A watercolor painting of a soccer player in a pink scarf in a forest	A watercolor painting of a soccer player in a forest, moved to the right side	A watercolor painting of 3 soccer players in a forest	A watercolor painting of a soccer player surfing in a forest
An illustration of a dog lying down in a cozy kitchen	An illustration of a dog in a cozy kitchen under golden-hour lighting	An illustration of a dog in a cozy kitchen, placed in the foreground	An illustration of a dog sitting in a cozy kitchen	An illustration of a dog underwater near coral
An illustration of a train sailing in a modern office, in profile	An illustration of a train in a modern office, overhead view	An illustration of a train in a modern office, moved to the right side	An illustration of a train in a modern office under soft studio lighting	An illustration of a train in a modern office, make it triangular
A 3D render of a chef running in a classroom	A 3D render of a chef typing in a classroom	A 3D render of a chef holding a purple microphone in a classroom	A 3D render of a chef in a white shirt in a classroom	A 3D render of a chef in a classroom backlit with a subtle rim light
A watercolor painting of a fish swimming at an amusement park	A watercolor painting of a fish at an amusement park backlit with a subtle rim light	A watercolor painting of a fish at an amusement park, shifted slightly upward	A watercolor painting of a fish at an amusement park, facing forward	A watercolor painting of a fish in a foggy forest
A photo of an elephant standing in a desert	A photo of an elephant in a desert, placed in the background	A photo of an elephant in a desert with fluorescent indoor lighting	A photo of 4 elephants in a desert	A photo of an elephant on a rainy street
A photo of a dog running underwater near a coral reef, overhead view	A photo of a dog underwater near a coral reef with warm tungsten lighting	A photo of a dog underwater near a coral reef, placed in the background	A photo of a dog with purple shell underwater near a coral reef	A photo of 3 dogs underwater near a coral reef
A watercolor painting of a windmill standing in a forest, overhead view	A watercolor painting of a windmill in a forest, moved to the left side	A watercolor painting of a windmill in a modern office	A watercolor painting of a windmill in a forest, close-up	A watercolor painting of a windmill in a forest with fluorescent indoor lighting
A 3D render of a hiker waving in a medieval village with moody low-key lighting	A 3D render of a hiker in a medieval village, overhead view	A 3D render of 2 hikers in a medieval village	A 3D render of a hiker in a foggy forest	A 3D render of a hiker wearing a brown hat in a medieval village
An illustration of an airplane sailing underwater near a coral reef, facing forward	An illustration of 3 airplanes underwater near a coral reef	An illustration of an airplane landing underwater near a coral reef	An illustration of an airplane underwater near a coral reef, centered	An illustration of a cyan airplane underwater near a coral reef
An illustration of a basketball player dancing on a soccer field backlit with a subtle rim light	An illustration of a basketball player on a soccer field, overhead view	An illustration of a basketball player in a modern office	An illustration of a basketball player holding a magenta skateboard on a soccer field	An illustration of a basketball player on a soccer field backlit with a subtle rim light
A watercolor painting of a cyclist smiling on the moon with moody low-key lighting, facing forward	A watercolor painting of a cyclist on the moon, shifted slightly downward	A watercolor painting of a cyclist on the moon with bright high-key lighting	A watercolor painting of a cyclist holding a lavender book on the moon	A watercolor painting of 4 cyclists on the moon
An illustration of a train flying in a garden under golden-hour lighting	An illustration of a train flying in a garden	An illustration of a train in a garden, close-up	An illustration of 5 trains in a garden	An illustration of a train with a beige roof rack in a garden
A photo of a lamp displayed on a farm with fluorescent indoor lighting	A photo of a lamp on a farm, in profile	A photo of a lamp on a farm under neon lighting	A photo of 2 lamps on a farm	A photo of a lamp underwater near coral
A 3D render of a runner hiking inside a library with fluorescent indoor lighting, isometric view	A 3D render of a runner in a lavender dress inside a library	A 3D render of 4 runners inside a library	A 3D render of a runner holding a purple guitar inside a library	A 3D render of a runner inside a library under golden-hour lighting
A watercolor painting of a train taking off in a city street	A watercolor painting of a yellow train in a city street	A watercolor painting of a train in a city street under golden-hour lighting	A watercolor painting of a train in a desert with dunes	A watercolor painting of a train drifting in a city street
A photo of a dolphin leaping out of the water in a cyberpunk alley	A photo of a dolphin with bronze feathers in a cyberpunk alley	A photo of a dolphin in a cyberpunk alley, shifted slightly upward	A photo of a dolphin in a cyberpunk alley, isometric view	A photo of a dolphin on a rainy street
A 3D render of a squirrel sitting inside a cave, facing right	A 3D render of a squirrel inside a cave, moved to the left side	A 3D render of a squirrel inside a cave, isometric view	A 3D render of a squirrel inside a cave under neon lighting	A 3D render of 3 squirrels inside a cave
A watercolor painting of a sand dune sitting in a castle hall, in profile	A watercolor painting of a sand dune with cyan leaves in a castle hall	A watercolor painting of a sand dune in a castle hall, facing forward	A watercolor painting of a sand dune with 1 beige birds in the branches in a castle hall	A watercolor painting of a sand dune in a castle hall, shifted slightly upward
A watercolor painting of a bee playing in a modern office	A watercolor painting of a bee on the moon surface	A watercolor painting of a bee in a modern office, moved to the right side	A watercolor painting of a bee in a modern office with warm tungsten lighting	A watercolor painting of a bee with maroon feathers in a modern office
A watercolor painting of a surfer typing in a cozy kitchen, top-down view	A watercolor painting of a surfer in a cozy kitchen under overcast light	A watercolor painting of a surfer wearing a bronze jacket in a cozy kitchen	A watercolor painting of a surfer in a beige shirt in a cozy kitchen	A watercolor painting of a surfer in a cozy kitchen
An illustration of a horse playing underwater near a coral reef with warm tungsten lighting, wide-angle view	An illustration of a horse underwater near a coral reef, close-up	An illustration of a horse wearing a black cape underwater near a coral reef	An illustration of a horse underwater near a coral reef, placed in the foreground	An illustration of a horse underwater near a coral reef backlit with a subtle rim light
An illustration of a rabbit sitting on a rocky Mars landscape	An illustration of a rabbit on a rainy street	An illustration of a rabbit on a rocky Mars landscape, centered	An illustration of a rabbit sitting on a rocky Mars landscape	An illustration of a rabbit on a rocky Mars landscape backlit with a subtle rim light
An illustration of an elephant standing in a snowy field, overhead view	An illustration of an elephant in a modern office	An illustration of an elephant with lavender feathers in a snowy field	An illustration of an elephant in a snowy field with warm tungsten lighting	An illustration of an elephant in a snowy field, facing forward
An oil painting of a camera displayed with a city skyline behind with tiny fairy lights in the background, top-down view	An oil painting of a magenta camera with a city skyline behind	An oil painting of a camera with a city skyline behind, make it square-shaped	An oil painting of a camera with a city skyline behind, top-down view	An oil painting of 3 cameras with a city skyline behind
A 3D render of a yoga practitioner sitting in a castle hall, close-up	A 3D render of a yoga practitioner in a castle hall, moved to the left side	A 3D render of a yoga practitioner in a castle hall under golden-hour lighting	A 3D render of a yoga practitioner in a castle hall, top-down view	A 3D render of a yoga practitioner typing in a castle hall
A 3D render of a mountain sitting under a thunderstorm sky with moody low-key lighting	A 3D render of 3 mountains under a thunderstorm sky	A 3D render of a mountain under a thunderstorm sky under overcast light	A 3D render of a mountain with 2 pink butterflies around under a thunderstorm sky	A 3D render of a mountain inside a library
A 3D render of a truck flying inside a cave	A 3D render of a truck in a desert with dunes	A 3D render of 2 trucks inside a cave	A 3D render of a truck flying inside a cave	A 3D render of a truck with a beige racing stripe inside a cave
An oil painting of a guitarist reading in a zen garden with moody low-key lighting, facing right	An oil painting of 5 guitarists in a zen garden	An oil painting of a guitarist in a zen garden under neon lighting	An oil painting of a guitarist in a zen garden, in profile	An oil painting of a guitarist in a purple shirt in a zen garden
A watercolor painting of a skateboarder dancing at an amusement park, facing right	A watercolor painting of a skateboarder inside a library	A watercolor painting of a skateboarder at an amusement park, top-down view	A watercolor painting of a skateboarder at an amusement park under golden-hour lighting	A watercolor painting of a skateboarder wearing cyan sneakers at an amusement park
An illustration of a penguin flying in a classroom backlit with a subtle rim light, facing forward	An illustration of a penguin in a classroom, facing right	An illustration of a penguin in a classroom under neon lighting	An illustration of a penguin on the moon surface	An illustration of 4 penguins in a classroom
A 3D render of a drum sitting on a beach	A 3D render of a drum on a beach under overcast light	A 3D render of a cyan drum on a beach	A 3D render of a drum with 3 red stickers on a beach	A 3D render of a drum at sunrise in a meadow
A watercolor painting of a pagoda standing in a cozy kitchen under golden-hour lighting	A watercolor painting of a pagoda in a cozy kitchen	A watercolor painting of a pagoda in a cozy kitchen, placed in the background	A watercolor painting of 2 pagodas in a cozy kitchen	A watercolor painting of a pagoda with maroon leaves in a cozy kitchen
An illustration of a chef painting in a zen garden, facing left	An illustration of a chef in a zen garden, overhead view	An illustration of a chef holding a lime camera in a zen garden	An illustration of a chef at a carnival	An illustration of a chef posing in a zen garden
A 3D render of a guitar displayed on the moon	A 3D render of a guitar on the moon, shifted slightly downward	A 3D render of a guitar on the moon, isometric view	A 3D render of a guitar on the moon backlit with a subtle rim light	A 3D render of 5 guitars on the moon
A watercolor painting of a motorcycle moving on a lake pier under soft studio lighting	A watercolor painting of 2 motorcycles on a lake pier	A watercolor painting of a motorcycle at sunrise in a meadow	A watercolor painting of a motorcycle on a lake pier, wide-angle view	A watercolor painting of a motorcycle on a lake pier, shifted slightly downward
A 3D render of an elephant walking in an art studio	A 3D render of an elephant in an art studio under golden-hour lighting	A 3D render of an elephant at a carnival	A 3D render of an elephant wearing a teal scarf in an art studio	A 3D render of 4 elephants in an art studio
A photo of a windmill standing under a thunderstorm sky under neon lighting, facing forward	A photo of a windmill under a thunderstorm sky, placed in the background	A photo of a windmill under a thunderstorm sky, close-up	A photo of a windmill with 3 cyan butterflies around under a thunderstorm sky	A photo of a windmill in a cozy kitchen
An oil painting of a train landing in a classroom, wide-angle view	An oil painting of a train flying in a classroom	An oil painting of a train in a classroom, make it heart-shaped	An oil painting of a train in a classroom backlit with a subtle rim light	An oil painting of 4 trains in a classroom
A watercolor painting of a violinist dancing at a train station under neon lighting, wide-angle view	A watercolor painting of a violinist holding a teal book at a train station	A watercolor painting of a violinist at a train station backlit with a subtle rim light	A watercolor painting of a violinist at a train station, isometric view	A watercolor painting of a violinist smiling at a train station
An oil painting of a bus moving on a beach	An oil painting of a bus with 1 brown stickers on the door on a beach	An oil painting of a bus moving on a beach	An oil painting of a bus in a foggy forest	An oil painting of a bus on a beach, close-up
An oil painting of a turtle diving on a beach with fluorescent indoor lighting, top-down view	An oil painting of a turtle on a beach, overhead view	An oil painting of 2 turtles on a beach	An oil painting of a turtle wearing a teal bandana on a beach	An oil painting of a turtle at sunrise in a meadow
A photo of an elephant sitting at a carnival with bright high-key lighting, close-up	A photo of an elephant at a carnival, overhead view	A photo of an elephant at a carnival with warm tungsten lighting	A photo of an elephant on a lake pier	A photo of an elephant with purple shell at a carnival
A 3D render of a bee running at a carnival with tiny fairy lights in the background, close-up	A 3D render of a bee wearing a brown hat at a carnival	A 3D render of a bee at a carnival backlit with a subtle rim light	A 3D render of 3 bees at a carnival	A 3D render of a bee with silver scales at a carnival
An oil painting of an owl gliding in outer space	An oil painting of an owl in outer space under overcast light	An oil painting of an owl gliding in outer space	An oil painting of an owl in outer space, close-up	An oil painting of an owl with beige shell in outer space
A watercolor painting of a dog standing on a neon-lit street at night with fluorescent indoor lighting	A watercolor painting of a dog on a neon-lit street at night backlit with a subtle rim light	A watercolor painting of 3 dogs on a neon-lit street at night	A watercolor painting of a dog with purple fur on a neon-lit street at night	A watercolor painting of a dog wearing a navy hat on a neon-lit street at night
An oil painting of a violin displayed inside an airport terminal under soft studio lighting	An oil painting of 2 violins inside an airport terminal	An oil painting of a violin in a neon-lit city at night	An oil painting of a violin inside an airport terminal, placed in the foreground	An oil painting of a violin inside an airport terminal with tiny fairy lights in the background
An illustration of a castle sitting on a lake pier under golden-hour lighting, in profile	An illustration of a castle with 2 pink lanterns hanging nearby on a lake pier	An illustration of 5 castles on a lake pier	An illustration of a castle in a zen garden	An illustration of a castle with cyan leaves on a lake pier
A 3D render of a candle standing in a cyberpunk alley, close-up	A 3D render of a candle with a purple ribbon in a cyberpunk alley	A 3D render of a candle in a cyberpunk alley, placed in the foreground	A 3D render of a candle in a desert with dunes	A 3D render of 3 candles in a cyberpunk alley
A photo of a cyclist skating in a forest with moody low-key lighting, top-down view	A photo of a cyclist in a bronze scarf in a forest	A photo of a cyclist holding a beige umbrella in a forest	A photo of a cyclist in a forest under overcast light	A photo of a cyclist in a forest, facing right
A 3D render of a tree standing with a city skyline behind, isometric view	A 3D render of 3 trees with a city skyline behind	A 3D render of a tree on a lake pier	A 3D render of a tree with 2 bronze lanterns hanging nearby with a city skyline behind	A 3D render of a tree with a city skyline behind, moved to the right side
A 3D render of a windmill standing with a city skyline behind under overcast light	A 3D render of a windmill with a city skyline behind, isometric view	A 3D render of a windmill with cyan leaves with a city skyline behind	A 3D render of 2 windmills with a city skyline behind	A 3D render of a windmill with 2 pink birds in the branches with a city skyline behind
A watercolor painting of a subway train parked in a temple courtyard, facing forward	A watercolor painting of a magenta subway train in a temple courtyard	A watercolor painting of a subway train in a temple courtyard, facing left	A watercolor painting of a subway train on a snowy mountain	A watercolor painting of 5 subway trains in a temple courtyard
A photo of a castle sitting at an amusement park	A photo of a castle with 4 blue butterflies around at an amusement park	A photo of a castle at an amusement park, in profile	A photo of a castle with bronze flowers at an amusement park	A photo of a castle on a space station
A watercolor painting of a mountain sitting in a classroom, facing forward	A watercolor painting of a mountain in a classroom, moved to the right side	A watercolor painting of a mountain in a classroom with tiny fairy lights in the background	A watercolor painting of a mountain on a beach at sunset	A watercolor painting of a mountain painted brown in a classroom
A photo of a bear playing on a farm	A photo of a bear on a farm, placed in the background	A photo of a bear sleeping on a farm	A photo of a bear with lavender scales on a farm	A photo of a bear on a farm, facing forward
An illustration of an owl spreading wings on a farm, close-up	An illustration of an owl flying on a farm	An illustration of an owl wearing brown glasses on a farm	An illustration of an owl on a farm with bright high-key lighting	An illustration of an owl on a farm, overhead view
A 3D render of a dog jumping by a riverbank, in profile	A 3D render of 3 dogs by a riverbank	A 3D render of a dog by a riverbank under soft studio lighting	A 3D render of a dog with cyan scales by a riverbank	A 3D render of a dog wearing a purple hat by a riverbank
A photo of a motorcycle drifting with a city skyline behind	A photo of a motorcycle with a city skyline behind with warm tungsten lighting	A photo of 3 motorcycles with a city skyline behind	A photo of a motorcycle parked with a city skyline behind	A photo of a silver motorcycle with a city skyline behind
A photo of a potted plant sitting by a riverbank	A photo of 3 potted plants by a riverbank	A photo of a potted plant by a riverbank, moved to the right side	A photo of a potted plant by a riverbank under overcast light	A photo of a potted plant with a lavender logo by a riverbank
An illustration of a fox lying down under a thunderstorm sky under overcast light, overhead view	An illustration of a fox with beige scales under a thunderstorm sky	An illustration of a fox on a space station	An illustration of a fox under a thunderstorm sky under soft studio lighting	An illustration of a fox wearing a lime cape under a thunderstorm sky
An oil painting of a basketball player surfing in a castle hall	An oil painting of a basketball player in a cyan scarf in a castle hall	An oil painting of a basketball player wearing a navy hat in a castle hall	An oil painting of a basketball player in a castle hall, facing left	An oil painting of a basketball player in a castle hall, moved to the right side
A 3D render of a whale diving in a city street, top-down view	A 3D render of a whale in a city street, isometric view	A 3D render of 4 whales in a city street	A 3D render of a whale wearing a orange scarf in a city street	A 3D render of a whale with gold feathers in a city street
A 3D render of a windmill standing in outer space under golden-hour lighting	A 3D render of a windmill in outer space, centered	A 3D render of a windmill in outer space, close-up	A 3D render of a windmill with blue leaves in outer space	A 3D render of a windmill in outer space under soft studio lighting
An illustration of a cat sleeping in a desert, wide-angle view	An illustration of a cat wearing a yellow bandana in a desert	An illustration of a cat in a desert with fluorescent indoor lighting	An illustration of a cat in a desert, close-up	An illustration of a cat in a desert, moved to the right side
An oil painting of a cat walking in a medieval village with tiny fairy lights in the background	An oil painting of a cat with green scales in a medieval village	An oil painting of a cat with a pink collar in a medieval village	An oil painting of a cat in a medieval village, in profile	An oil painting of a cat in a medieval village backlit with a subtle rim light
A 3D render of a train racing in a castle hall, facing right	A 3D render of a train sailing in a castle hall	A 3D render of a train with 4 beige stickers on the door in a castle hall	A 3D render of 5 trains in a castle hall	A 3D render of a train in a castle hall, placed in the foreground
A photo of a helicopter drifting in a cozy kitchen, wide-angle view	A photo of a helicopter in a cozy kitchen, make it square-shaped	A photo of a helicopter in a cozy kitchen, overhead view	A photo of a helicopter on the moon surface	A photo of a helicopter with a yellow racing stripe in a cozy kitchen
A 3D render of a castle sitting on a neon-lit street at night under overcast light	A 3D render of 3 castles on a neon-lit street at night	A 3D render of a castle with a yellow rainbow in the sky on a neon-lit street at night	A 3D render of a castle on a neon-lit street at night with tiny fairy lights in the background	A 3D render of a castle on a neon-lit street at night, placed in the background
A photo of a mountain sitting in a forest under overcast light, overhead view	A photo of a mountain in a forest, placed in the background	A photo of a mountain with a navy rainbow in the sky in a forest	A photo of a mountain in a forest, facing right	A photo of 4 mountains in a forest
An illustration of a skateboarder hiking on the moon with moody low-key lighting	An illustration of 5 skateboarders on the moon	An illustration of a skateboarder in a silver jacket on the moon	An illustration of a skateboarder standing on the moon	An illustration of a skateboarder wearing orange glasses on the moon
A watercolor painting of a pagoda standing on a music stage, wide-angle view	A watercolor painting of a pagoda on a music stage, isometric view	A watercolor painting of a pagoda in a neon-lit city at night	A watercolor painting of a pagoda on a music stage with bright high-key lighting	A watercolor painting of a pagoda with 3 purple birds in the branches on a music stage
A photo of a runner standing on a beach, wide-angle view	A photo of a runner on a beach, isometric view	A photo of a runner on a beach with warm tungsten lighting	A photo of a runner on a beach at sunset	A photo of a runner taking a photo on a beach
A watercolor painting of a bicycle moving inside a library	A watercolor painting of a bicycle with a silver decal inside a library	A watercolor painting of a bicycle in a modern office	A watercolor painting of a bicycle inside a library, make it round	A watercolor painting of a bicycle taking off inside a library
A watercolor painting of a runner surfing inside a cave, top-down view	A watercolor painting of a runner inside a cave with tiny fairy lights in the background	A watercolor painting of a runner holding a blue camera inside a cave	A watercolor painting of a runner jumping inside a cave	A watercolor painting of a runner inside a cave, moved to the left side
A photo of a castle sitting with a city skyline behind with warm tungsten lighting, isometric view	A photo of 4 castles with a city skyline behind	A photo of a castle on the moon surface	A photo of a castle with a city skyline behind under neon lighting	A photo of a castle with 4 brown lanterns hanging nearby with a city skyline behind
An illustration of a mountain sitting on the moon, in profile	An illustration of a mountain on the moon, wide-angle view	An illustration of a mountain with white leaves on the moon	An illustration of a mountain underwater near coral	An illustration of a mountain on the moon, moved to the left side
An illustration of a bus flying on a farm, facing left	An illustration of a bus in a zen garden	An illustration of a bus moving on a farm	An illustration of a bus on a farm, top-down view	An illustration of a bronze bus on a farm
An oil painting of a waterfall sitting in a city street	An oil painting of a waterfall on a space station	An oil painting of a waterfall with a red rainbow in the sky in a city street	An oil painting of a waterfall in a city street under neon lighting	An oil painting of 4 waterfalls in a city street
A watercolor painting of a hiker hiking at an amusement park	A watercolor painting of a hiker holding a navy balloon at an amusement park	A watercolor painting of a hiker at an amusement park, in profile	A watercolor painting of a hiker at an amusement park backlit with a subtle rim light	A watercolor painting of 3 hikers at an amusement park
An illustration of a mirror displayed under a thunderstorm sky, close-up	An illustration of a mirror under a thunderstorm sky, in profile	An illustration of a mirror with a beige logo under a thunderstorm sky	An illustration of a mirror under a thunderstorm sky with warm tungsten lighting	An illustration of a mirror under a thunderstorm sky, moved to the right side
An illustration of an astronaut sitting on a farm with bright high-key lighting	An illustration of an astronaut in a red scarf on a farm	An illustration of an astronaut on a farm under neon lighting	An illustration of an astronaut smiling on a farm	An illustration of 2 astronauts on a farm
An illustration of an eagle flying in a temple courtyard under neon lighting, close-up	An illustration of an eagle perched in a temple courtyard	An illustration of an eagle wearing a purple cape in a temple courtyard	An illustration of 2 eagles in a temple courtyard	An illustration of an eagle with lavender shell in a temple courtyard
A photo of a sand dune sitting in a cozy kitchen under overcast light, top-down view	A photo of a sand dune painted green in a cozy kitchen	A photo of a sand dune with a gold rainbow in the sky in a cozy kitchen	A photo of a sand dune in a cozy kitchen under overcast light	A photo of a sand dune in a cozy kitchen, facing forward
A watercolor painting of an airplane flying at an open-air market with warm tungsten lighting, in profile	A watercolor painting of 2 airplanes at an open-air market	A watercolor painting of a blue airplane at an open-air market	A watercolor painting of an airplane at an open-air market, close-up	A watercolor painting of an airplane racing at an open-air market
An oil painting of a fish diving on a rocky Mars landscape under soft studio lighting, in profile	An oil painting of a fish with a navy collar on a rocky Mars landscape	An oil painting of 4 fish on a rocky Mars landscape	An oil painting of a fish leaping out of the water on a rocky Mars landscape	An oil painting of a fish with yellow shell on a rocky Mars landscape
A 3D render of a bridge sitting in a castle hall under golden-hour lighting	A 3D render of a bridge with maroon flowers in a castle hall	A 3D render of a bridge with 2 silver birds in the branches in a castle hall	A 3D render of a bridge in a desert with dunes	A 3D render of a bridge in a castle hall, moved to the right side
A photo of a surfer running at a train station with warm tungsten lighting	A photo of a surfer at a train station, in profile	A photo of a surfer at a train station under neon lighting	A photo of a surfer at a train station, moved to the right side	A photo of a surfer holding a lavender camera at a train station
A photo of a tree standing near a waterfall, facing right	A photo of a tree near a waterfall with bright high-key lighting	A photo of a tree near a waterfall, shifted slightly upward	A photo of a tree with 3 gold birds in the branches near a waterfall	A photo of a tree with lime leaves near a waterfall
A watercolor painting of a flower bush sitting near a waterfall	A watercolor painting of a flower bush with lime leaves near a waterfall	A watercolor painting of a flower bush with a cyan rainbow in the sky near a waterfall	A watercolor painting of a flower bush near a waterfall, shifted slightly downward	A watercolor painting of 4 flower bushes near a waterfall
A photo of a tree standing on a rocky Mars landscape	A photo of a tree on a rocky Mars landscape under neon lighting	A photo of a tree in a zen garden	A photo of a tree on a rocky Mars landscape, overhead view	A photo of a tree with 1 bronze butterflies around on a rocky Mars landscape
An oil painting of a sand dune sitting in outer space under neon lighting, wide-angle view	An oil painting of a sand dune in outer space, facing left	An oil painting of a sand dune in outer space with fluorescent indoor lighting	An oil painting of a sand dune in a desert with dunes	An oil painting of a sand dune with a green rainbow in the sky in outer space
A photo of a basketball player juggling on a rooftop	A photo of 5 basketball players on a rooftop	A photo of a basketball player in a red hat on a rooftop	A photo of a basketball player on a rooftop, facing right	A photo of a basketball player in a neon-lit city at night
A watercolor painting of a potted plant sitting in a castle hall, facing forward	A watercolor painting of a potted plant with 4 cyan stickers in a castle hall	A watercolor painting of a potted plant in a castle hall, wide-angle view	A watercolor painting of a beige potted plant in a castle hall	A watercolor painting of 4 potted plants in a castle hall
An illustration of a sand dune sitting inside a library, close-up	An illustration of a sand dune in a cozy kitchen	An illustration of a sand dune with 1 bronze birds in the branches inside a library	An illustration of 4 sand dunes inside a library	An illustration of a sand dune inside a library, placed in the background
A watercolor painting of a mug placed in outer space under golden-hour lighting, close-up	A watercolor painting of a mug in outer space with fluorescent indoor lighting	A watercolor painting of a yellow mug in outer space	A watercolor painting of a mug in outer space, make it triangular	A watercolor painting of a mug underwater near coral
A 3D render of an airplane taking off on a music stage, facing right	A 3D render of an airplane on a space station	A 3D render of 5 airplanes on a music stage	A 3D render of an airplane on a music stage, facing forward	A 3D render of an airplane on a music stage backlit with a subtle rim light
An oil painting of an airplane moving in a garden under neon lighting, close-up	An oil painting of an airplane in a garden, isometric view	An oil painting of a navy airplane in a garden	An oil painting of an airplane moving in a garden	An oil painting of an airplane in a garden, shifted slightly downward
A watercolor painting of a bus drifting in a garden with warm tungsten lighting, close-up	A watercolor painting of a gold bus in a garden	A watercolor painting of a bus in a neon-lit city at night	A watercolor painting of a bus parked in a garden	A watercolor painting of a bus in a garden, isometric view
A photo of a soccer player sitting at a carnival under neon lighting, top-down view	A photo of 3 soccer players at a carnival	A photo of a soccer player at a carnival under soft studio lighting	A photo of a soccer player at a carnival, close-up	A photo of a soccer player in a pink jacket at a carnival
An illustration of a car moving on a sunset beach, close-up	An illustration of a car on a sunset beach, isometric view	An illustration of a car in a neon-lit city at night	An illustration of 2 cars on a sunset beach	An illustration of a car parked on a sunset beach
A photo of a castle sitting on a lake pier	A photo of a castle with a beige rainbow in the sky on a lake pier	A photo of 3 castles on a lake pier	A photo of a castle on a lake pier, centered	A photo of a castle in a modern office
An illustration of a surfer juggling underwater near a coral reef under neon lighting	An illustration of a surfer in a black jacket underwater near a coral reef	An illustration of a surfer underwater near a coral reef with fluorescent indoor lighting	An illustration of 4 surfers underwater near a coral reef	An illustration of a surfer underwater near a coral reef, close-up
An oil painting of a car parked in a modern office under golden-hour lighting	An oil painting of a car with a silver decal in a modern office	An oil painting of a magenta car in a modern office	An oil painting of a car in a modern office, centered	An oil painting of a car in a modern office with warm tungsten lighting
An illustration of a castle sitting in a cozy kitchen, top-down view	An illustration of a castle in a cozy kitchen, shifted slightly downward	An illustration of a castle in a zen garden	An illustration of 2 castles in a cozy kitchen	An illustration of a castle in a cozy kitchen with warm tungsten lighting
A photo of a car parked inside an airport terminal	A photo of a lavender car inside an airport terminal	A photo of a car inside an airport terminal, centered	A photo of 2 cars inside an airport terminal	A photo of a car taking off inside an airport terminal
A watercolor painting of a train parked in a classroom, in profile	A watercolor painting of a train in a classroom, placed in the background	A watercolor painting of a train with a black roof rack in a classroom	A watercolor painting of a train on a rainy street	A watercolor painting of a train in a classroom with warm tungsten lighting
A 3D render of a cat playing on a lake pier, top-down view	A 3D render of a cat on a lake pier, moved to the right side	A 3D render of a cat sitting on a lake pier	A 3D render of a cat with green feathers on a lake pier	A 3D render of a cat in a modern office
A photo of a bridge sitting in an art studio, overhead view	A photo of a bridge in an art studio under soft studio lighting	A photo of a bridge with 4 white birds in the branches in an art studio	A photo of a bridge in an art studio, top-down view	A photo of a bridge in a modern office
An oil painting of a train landing in a modern office, wide-angle view	An oil painting of a pink train in a modern office	An oil painting of a train on a lake pier	An oil painting of a train taking off in a modern office	An oil painting of a train in a modern office, top-down view
A 3D render of a squirrel jumping in a forest	A 3D render of a squirrel in a forest, facing forward	A 3D render of 3 squirrels in a forest	A 3D render of a squirrel in a forest, placed in the foreground	A 3D render of a squirrel wearing cyan glasses in a forest
A 3D render of a car parked in a snowy field, overhead view	A 3D render of a car in a snowy field, facing right	A 3D render of a car in a snowy field backlit with a subtle rim light	A 3D render of a car with a gold racing stripe in a snowy field	A 3D render of a car moving in a snowy field
An oil painting of a castle sitting in an art studio	An oil painting of a castle with blue flowers in an art studio	An oil painting of a castle in an art studio, placed in the foreground	An oil painting of a castle in a desert with dunes	An oil painting of a castle in an art studio with moody low-key lighting
A 3D render of a camera standing in a forest with moody low-key lighting, top-down view	A 3D render of a camera in a neon-lit city at night	A 3D render of an orange camera in a forest	A 3D render of a camera with a purple logo in a forest	A 3D render of a camera in a forest, overhead view
A watercolor painting of a bridge sitting at a carnival, facing forward	A watercolor painting of 3 bridges at a carnival	A watercolor painting of a bridge at a carnival, placed in the background	A watercolor painting of a bridge painted brown at a carnival	A watercolor painting of a bridge with 4 orange lanterns hanging nearby at a carnival
A photo of a photographer waving near a waterfall backlit with a subtle rim light	A photo of a photographer holding a yellow balloon near a waterfall	A photo of a photographer near a waterfall with tiny fairy lights in the background	A photo of a photographer sitting near a waterfall	A photo of a photographer near a waterfall, facing forward
A watercolor painting of a surfer doing a yoga pose near a waterfall under golden-hour lighting	A watercolor painting of a surfer in a neon-lit city at night	A watercolor painting of a surfer typing near a waterfall	A watercolor painting of a surfer in a black shirt near a waterfall	A watercolor painting of a surfer near a waterfall, moved to the left side
An illustration of an eagle perched at a train station	An illustration of an eagle in a flower garden	An illustration of an eagle wearing brown glasses at a train station	An illustration of 4 eagles at a train station	An illustration of an eagle at a train station with tiny fairy lights in the background
A 3D render of a squirrel jumping in a desert with bright high-key lighting	A 3D render of a squirrel wearing a brown bandana in a desert	A 3D render of a squirrel in a desert, facing right	A 3D render of a squirrel by a waterfall	A 3D render of a squirrel in a desert with fluorescent indoor lighting
A 3D render of a helicopter drifting in a garden, top-down view	A 3D render of a helicopter in a garden, make it cylindrical	A 3D render of a helicopter in a garden with bright high-key lighting	A 3D render of a blue helicopter in a garden	A 3D render of a helicopter at a carnival
An illustration of a train racing in outer space with tiny fairy lights in the background, top-down view	An illustration of a lavender train in outer space	An illustration of a train in outer space, isometric view	An illustration of a train in outer space, moved to the right side	An illustration of a train in a cozy kitchen
A 3D render of a painter reading on a basketball court, wide-angle view	A 3D render of a painter on a basketball court, moved to the left side	A 3D render of a painter reading on a basketball court	A 3D render of a painter carrying a bronze backpack on a basketball court	A 3D render of a painter on a beach at sunset
A 3D render of a table resting in a snowy field	A 3D render of a lavender table in a snowy field	A 3D render of a table in a snowy field with warm tungsten lighting	A 3D render of a table in a snowy field, make it heart-shaped	A 3D render of a table in a snowy field, placed in the foreground
A watercolor painting of a table resting on a soccer field	A watercolor painting of a table on a soccer field, shifted slightly upward	A watercolor painting of a table on a soccer field with moody low-key lighting	A watercolor painting of 3 tables on a soccer field	A watercolor painting of a table with a orange logo on a soccer field
A photo of a mountain sitting in a sci-fi corridor	A photo of a mountain in a foggy forest	A photo of a mountain in a sci-fi corridor with moody low-key lighting	A photo of a mountain in a sci-fi corridor, shifted slightly upward	A photo of a mountain with a purple rainbow in the sky in a sci-fi corridor
A watercolor painting of a photographer standing at an amusement park	A watercolor painting of a photographer in a modern office	A watercolor painting of a photographer at an amusement park with warm tungsten lighting	A watercolor painting of a photographer skating at an amusement park	A watercolor painting of a photographer in a navy dress at an amusement park
A watercolor painting of a clock placed on a beach	A watercolor painting of a clock with a green ribbon on a beach	A watercolor painting of a clock on a beach, moved to the left side	A watercolor painting of 4 clocks on a beach	A watercolor painting of a clock on a beach, top-down view
An oil painting of a drum placed in a cozy kitchen, in profile	An oil painting of a navy drum in a cozy kitchen	An oil painting of a drum in a cozy kitchen, wide-angle view	An oil painting of a drum in a cozy kitchen with fluorescent indoor lighting	An oil painting of a drum in a cozy kitchen, make it cylindrical
A 3D render of an eagle perched inside an airport terminal	A 3D render of an eagle spreading wings inside an airport terminal	A 3D render of an eagle on the moon surface	A 3D render of an eagle with a orange collar inside an airport terminal	A 3D render of 2 eagles inside an airport terminal
An illustration of an elephant walking at a carnival with warm tungsten lighting, facing left	An illustration of 5 elephants at a carnival	An illustration of an elephant at sunrise in a meadow	An illustration of an elephant at a carnival, facing forward	An illustration of an elephant running at a carnival
A 3D render of a teapot sitting on a farm	A 3D render of a teapot on a farm, centered	A 3D render of a teapot on a farm, make it heart-shaped	A 3D render of a teapot on a farm with moody low-key lighting	A 3D render of a teapot on a snowy mountain
An illustration of a lighthouse standing in an art studio	An illustration of a lighthouse in an art studio under golden-hour lighting	An illustration of a lighthouse on the moon surface	An illustration of a lighthouse with gold flowers in an art studio	An illustration of a lighthouse in an art studio, isometric view
A 3D render of a vase placed on a rocky Mars landscape	A 3D render of 2 vases on a rocky Mars landscape	A 3D render of a vase on a rocky Mars landscape, placed in the background	A 3D render of a vase in a neon-lit city at night	A 3D render of a vase on a rocky Mars landscape, in profile
An oil painting of a runner juggling in an art studio, facing forward	An oil painting of a runner in an art studio, isometric view	An oil painting of a runner in an art studio with warm tungsten lighting	An oil painting of 4 runners in an art studio	An oil painting of a runner on the moon surface
An illustration of a cyclist standing under a thunderstorm sky, facing forward	An illustration of 3 cyclists under a thunderstorm sky	An illustration of a cyclist under a thunderstorm sky, in profile	An illustration of a cyclist carrying a cyan backpack under a thunderstorm sky	An illustration of a cyclist standing under a thunderstorm sky
A watercolor painting of a tree standing on the moon backlit with a subtle rim light, overhead view	A watercolor painting of a tree on the moon, facing left	A watercolor painting of a tree painted navy on the moon	A watercolor painting of 5 trees on the moon	A watercolor painting of a tree on a beach at sunset
A watercolor painting of a butterfly running on a beach under neon lighting	A watercolor painting of a butterfly on a beach, overhead view	A watercolor painting of a butterfly with lavender feathers on a beach	A watercolor painting of a butterfly in a zen garden	A watercolor painting of 5 butterflies on a beach
A watercolor painting of a rabbit lying down on a soccer field, facing forward	A watercolor painting of 2 rabbits on a soccer field	A watercolor painting of a rabbit on a soccer field, shifted slightly downward	A watercolor painting of a rabbit sitting on a soccer field	A watercolor painting of a rabbit on a space station
A watercolor painting of a lighthouse standing in outer space, in profile	A watercolor painting of a lighthouse in a neon-lit city at night	A watercolor painting of a lighthouse in outer space under neon lighting	A watercolor painting of a lighthouse with 3 pink butterflies around in outer space	A watercolor painting of a lighthouse in outer space, moved to the left side
An oil painting of a sailboat taking off in outer space, isometric view	An oil painting of a sailboat with a orange roof rack in outer space	An oil painting of a sailboat in outer space, moved to the left side	An oil painting of a sailboat in outer space, make it heart-shaped	An oil painting of a sailboat in outer space, facing right
A photo of a deer running inside a cave	A photo of a deer inside a cave, placed in the foreground	A photo of 4 deer inside a cave	A photo of a deer inside a cave under overcast light	A photo of a deer on the moon surface
A photo of a helicopter taking off in a zen garden under neon lighting	A photo of a helicopter drifting in a zen garden	A photo of a helicopter at sunrise in a meadow	A photo of a beige helicopter in a zen garden	A photo of a helicopter in a zen garden with bright high-key lighting
A photo of a camera displayed on a soccer field, wide-angle view	A photo of a camera on a soccer field, shifted slightly downward	A photo of a camera on the moon surface	A photo of a camera on a soccer field, facing right	A photo of a camera on a soccer field, make it round
A 3D render of a burger displayed in a mountain meadow with tiny fairy lights in the background	A 3D render of a burger in a mountain meadow, moved to the left side	A 3D render of a burger in a mountain meadow under soft studio lighting	A 3D render of a teal burger in a mountain meadow	A 3D render of 5 burgers in a mountain meadow
An illustration of a flower bush sitting at an open-air market under golden-hour lighting	An illustration of 5 flower bushes at an open-air market	An illustration of a flower bush at an open-air market with tiny fairy lights in the background	An illustration of a flower bush at an open-air market, facing forward	An illustration of a flower bush with 3 blue lanterns hanging nearby at an open-air market
A 3D render of a mug placed on a soccer field under overcast light	A 3D render of 4 mugs on a soccer field	A 3D render of a mug on a soccer field, make it heart-shaped	A 3D render of a mug with a teal logo on a soccer field	A 3D render of a mug on a soccer field, facing forward
An illustration of a horse lying down in a medieval village under golden-hour lighting, facing forward	An illustration of a horse in a medieval village, placed in the background	An illustration of a horse in a medieval village, facing right	An illustration of a horse sitting in a medieval village	An illustration of a horse with lavender scales in a medieval village
An oil painting of a mirror resting in a cozy kitchen with fluorescent indoor lighting	An oil painting of a mirror in a cozy kitchen, make it cylindrical	An oil painting of a mirror with 5 white stickers in a cozy kitchen	An oil painting of a mirror in a cozy kitchen with warm tungsten lighting	An oil painting of a mirror in a cozy kitchen, close-up
An illustration of a statue resting on a lake pier under soft studio lighting	An illustration of a statue on a lake pier under golden-hour lighting	An illustration of 3 statues on a lake pier	An illustration of a statue on a lake pier, facing left	An illustration of a statue on a beach at sunset
A 3D render of a sneakers displayed in an art studio, facing forward	A 3D render of a silver sneakers in an art studio	A 3D render of a sneakers in an art studio, make it square-shaped	A 3D render of a sneakers at sunrise in a meadow	A 3D render of a sneakers in an art studio, isometric view
A 3D render of a pagoda standing on a neon-lit street at night under soft studio lighting, top-down view	A 3D render of a pagoda on a neon-lit street at night, moved to the right side	A 3D render of a pagoda painted lime on a neon-lit street at night	A 3D render of a pagoda on a neon-lit street at night under golden-hour lighting	A 3D render of 5 pagodas on a neon-lit street at night
A photo of a chef painting on a sunset beach, facing right	A photo of a chef on a sunset beach, facing right	A photo of a chef posing on a sunset beach	A photo of a chef in a lavender dress on a sunset beach	A photo of a chef on a sunset beach, shifted slightly upward
A 3D render of a mountain sitting on the moon with moody low-key lighting	A 3D render of a mountain on the moon, in profile	A 3D render of a mountain with orange leaves on the moon	A 3D render of a mountain with 4 green lanterns hanging nearby on the moon	A 3D render of a mountain on a lake pier
A photo of a bus sailing in a sunrise field	A photo of a bus in a sunrise field, top-down view	A photo of a bus in a sunrise field under neon lighting	A photo of a bus in a sunrise field, make it square-shaped	A photo of a bus in a foggy forest
A photo of an airplane drifting on a rooftop	A photo of an airplane racing on a rooftop	A photo of an airplane underwater near coral	A photo of an airplane on a rooftop, make it square-shaped	A photo of an airplane on a rooftop, placed in the background
A photo of a skateboarder taking a photo in an art studio with fluorescent indoor lighting, top-down view	A photo of a skateboarder in an art studio with warm tungsten lighting	A photo of 5 skateboarders in an art studio	A photo of a skateboarder in a beige dress in an art studio	A photo of a skateboarder in an art studio, overhead view
An oil painting of a turtle leaping out of the water in an art studio	An oil painting of a turtle wearing a navy cape in an art studio	An oil painting of a turtle in a zen garden	An oil painting of 4 turtles in an art studio	An oil painting of a turtle in an art studio, wide-angle view
An illustration of a hat sitting in a mountain meadow under overcast light	An illustration of a hat in a mountain meadow, make it square-shaped	An illustration of 5 hats in a mountain meadow	An illustration of a hat in a mountain meadow with warm tungsten lighting	An illustration of a hat in a mountain meadow, facing left
A photo of a flower bush sitting on a neon-lit street at night backlit with a subtle rim light	A photo of a flower bush with 4 blue butterflies around on a neon-lit street at night	A photo of a flower bush on a neon-lit street at night under neon lighting	A photo of 3 flower bushes on a neon-lit street at night	A photo of a flower bush on a neon-lit street at night, isometric view
A photo of a car sailing at a skate park, close-up	A photo of a car at a skate park, overhead view	A photo of 3 cars at a skate park	A photo of a car at a skate park under neon lighting	A photo of a car with a navy decal at a skate park
A 3D render of a drone flying inside a cave, facing left	A 3D render of a brown drone inside a cave	A 3D render of a drone inside a cave, top-down view	A 3D render of a drone sailing inside a cave	A 3D render of a drone inside a cave, placed in the background
A photo of a car taking off inside a library with warm tungsten lighting, top-down view	A photo of a car inside a library, shifted slightly downward	A photo of 3 cars inside a library	A photo of a car inside a library, overhead view	A photo of a car taking off inside a library
A watercolor painting of a clock displayed in a classroom, facing right	A watercolor painting of a clock in a classroom backlit with a subtle rim light	A watercolor painting of 5 clocks in a classroom	A watercolor painting of a clock in a classroom, placed in the foreground	A watercolor painting of a clock in a classroom, wide-angle view
An illustration of a photographer standing in a zen garden under overcast light, wide-angle view	An illustration of a photographer in a zen garden, top-down view	An illustration of a photographer in a zen garden, moved to the right side	An illustration of a photographer doing a yoga pose in a zen garden	An illustration of a photographer in a bronze shirt in a zen garden
An illustration of a flower bush sitting in a modern office with moody low-key lighting, top-down view	An illustration of 2 flower bushes in a modern office	An illustration of a flower bush in a modern office, centered	An illustration of a flower bush with 1 pink butterflies around in a modern office	An illustration of a flower bush in a modern office, facing right
A 3D render of a bridge sitting in a classroom	A 3D render of a bridge with 3 pink lanterns hanging nearby in a classroom	A 3D render of a bridge on a lake pier	A 3D render of 4 bridges in a classroom	A 3D render of a bridge in a classroom, moved to the left side
A photo of a cyclist painting on a music stage	A photo of a cyclist in a navy jacket on a music stage	A photo of 5 cyclists on a music stage	A photo of a cyclist on a music stage under golden-hour lighting	A photo of a cyclist on a music stage, shifted slightly downward
A photo of a basketball player standing in a foggy forest under golden-hour lighting, isometric view	A photo of a basketball player in a foggy forest, in profile	A photo of a basketball player in a black scarf in a foggy forest	A photo of 2 basketball players in a foggy forest	A photo of a basketball player skating in a foggy forest
A watercolor painting of a fox playing at a skate park, facing right	A watercolor painting of a fox walking at a skate park	A watercolor painting of a fox at a skate park under neon lighting	A watercolor painting of a fox at a skate park, moved to the right side	A watercolor painting of a fox wearing a lavender hat at a skate park
A 3D render of a skateboarder juggling under a thunderstorm sky under neon lighting	A 3D render of a skateboarder in a white shirt under a thunderstorm sky	A 3D render of a skateboarder under a thunderstorm sky, moved to the left side	A 3D render of a skateboarder hiking under a thunderstorm sky	A 3D render of a skateboarder under a thunderstorm sky, wide-angle view
A photo of a flower bush sitting in a mountain meadow, facing left	A photo of a flower bush in a mountain meadow, moved to the left side	A photo of a flower bush in a mountain meadow with fluorescent indoor lighting	A photo of 5 flower bushes in a mountain meadow	A photo of a flower bush with purple leaves in a mountain meadow
A 3D render of a bridge sitting in a forest	A 3D render of a bridge on a rainy street	A 3D render of 2 bridges in a forest	A 3D render of a bridge with orange leaves in a forest	A 3D render of a bridge in a forest, facing left
A photo of a drum resting in a garden, facing right	A photo of a drum with 5 navy stickers in a garden	A photo of a drum on a space station	A photo of 3 drums in a garden	A photo of a drum in a garden, close-up
A watercolor painting of a bicycle flying on a beach, facing forward	A watercolor painting of a bicycle on a beach, isometric view	A watercolor painting of 4 bicycles on a beach	A watercolor painting of a bicycle on a beach, moved to the right side	A watercolor painting of a bicycle on a beach, make it heart-shaped
An oil painting of a motorcycle flying in a foggy forest	An oil painting of a motorcycle in a foggy forest, isometric view	An oil painting of a motorcycle in a foggy forest, make it heart-shaped	An oil painting of a lime motorcycle in a foggy forest	An oil painting of a motorcycle in a foggy forest, shifted slightly downward
A photo of a guitar standing underwater near a coral reef	A photo of a red guitar underwater near a coral reef	A photo of a guitar underwater near a coral reef under soft studio lighting	A photo of 5 guitars underwater near a coral reef	A photo of a guitar underwater near a coral reef, moved to the right side
A 3D render of an owl perched inside a library, close-up	A 3D render of 2 owls inside a library	A 3D render of an owl on a space station	A 3D render of an owl inside a library, close-up	A 3D render of an owl inside a library under soft studio lighting
A photo of a painter surfing in a cozy kitchen with fluorescent indoor lighting	A photo of a painter in a green jacket in a cozy kitchen	A photo of a painter in a cozy kitchen with warm tungsten lighting	A photo of a painter standing in a cozy kitchen	A photo of a painter holding a lavender book in a cozy kitchen
An oil painting of a skateboarder skating on a neon-lit street at night, top-down view	An oil painting of 4 skateboarders on a neon-lit street at night	An oil painting of a skateboarder on a neon-lit street at night, placed in the background	An oil painting of a skateboarder on a neon-lit street at night with fluorescent indoor lighting	An oil painting of a skateboarder carrying a lavender backpack on a neon-lit street at night
An oil painting of a parrot spreading wings in an art studio with fluorescent indoor lighting	An oil painting of a parrot in an art studio with tiny fairy lights in the background	An oil painting of a parrot in a zen garden	An oil painting of 2 parrots in an art studio	An oil painting of a parrot spreading wings in an art studio
A 3D render of a runner skating on a sunset beach, isometric view	A 3D render of 4 runners on a sunset beach	A 3D render of a runner carrying a teal backpack on a sunset beach	A 3D render of a runner on a snowy mountain	A 3D render of a runner in a teal hat on a sunset beach
An oil painting of a truck flying in a classroom	An oil painting of a truck in a classroom, placed in the foreground	An oil painting of a truck with a lime roof rack in a classroom	An oil painting of a truck in a classroom, facing forward	An oil painting of a truck parked in a classroom
An illustration of a mountain sitting on a music stage, overhead view	An illustration of a mountain in a neon-lit city at night	An illustration of a mountain painted orange on a music stage	An illustration of a mountain on a music stage, overhead view	An illustration of a mountain with 3 green lanterns hanging nearby on a music stage
A photo of a bus taking off in a foggy forest	A photo of a silver bus in a foggy forest	A photo of a bus in a foggy forest, placed in the background	A photo of a bus racing in a foggy forest	A photo of a bus in a foggy forest, make it heart-shaped
An oil painting of a drone taking off in outer space	An oil painting of a drone flying in outer space	An oil painting of a drone in outer space with bright high-key lighting	An oil painting of 4 drones in outer space	An oil painting of a drone in outer space, wide-angle view
A watercolor painting of a whale leaping out of the water inside a cave, facing forward	A watercolor painting of a whale inside a cave, shifted slightly upward	A watercolor painting of a whale inside a cave under golden-hour lighting	A watercolor painting of a whale with lavender scales inside a cave	A watercolor painting of a whale wearing a lavender bandana inside a cave
A 3D render of a train flying on a farm	A 3D render of a train on a farm, in profile	A 3D render of a train on a farm under neon lighting	A 3D render of a train on a farm, make it triangular	A 3D render of a train racing on a farm
A 3D render of a mountain sitting in a medieval village under overcast light, facing forward	A 3D render of a mountain in a medieval village under overcast light	A 3D render of a mountain on a beach at sunset	A 3D render of a mountain with 3 green lanterns hanging nearby in a medieval village	A 3D render of a mountain in a medieval village, placed in the foreground
An illustration of a lizard lying down at a cafe	An illustration of a lizard on a snowy mountain	An illustration of a lizard at a cafe, close-up	An illustration of a lizard wearing a silver hat at a cafe	An illustration of a lizard at a cafe, moved to the right side
An illustration of a painting standing inside a library, in profile	An illustration of a painting inside a library, shifted slightly downward	An illustration of a navy painting inside a library	An illustration of a painting on a lake pier	An illustration of a painting with a maroon ribbon inside a library
A photo of a mountain sitting in a zen garden, facing right	A photo of a mountain in a zen garden, moved to the right side	A photo of a mountain on a lake pier	A photo of a mountain with orange flowers in a zen garden	A photo of a mountain with 2 orange birds in the branches in a zen garden
An illustration of a parrot perched underwater near a coral reef, close-up	An illustration of a parrot underwater near a coral reef with tiny fairy lights in the background	An illustration of a parrot with maroon fur underwater near a coral reef	An illustration of a parrot underwater near a coral reef, wide-angle view	An illustration of a parrot flying underwater near a coral reef
An oil painting of a bear playing in a cyberpunk alley, isometric view	An oil painting of 4 bears in a cyberpunk alley	An oil painting of a bear with brown scales in a cyberpunk alley	An oil painting of a bear on the moon surface	An oil painting of a bear in a cyberpunk alley, top-down view
An oil painting of a fish diving under a thunderstorm sky	An oil painting of a fish in a modern office	An oil painting of a fish under a thunderstorm sky, facing right	An oil painting of a fish with cyan fur under a thunderstorm sky	An oil painting of a fish under a thunderstorm sky, shifted slightly upward
An oil painting of a bicycle moving in a zen garden, close-up	An oil painting of a bicycle sailing in a zen garden	An oil painting of a bicycle in a zen garden under soft studio lighting	An oil painting of a bicycle in a zen garden, shifted slightly downward	An oil painting of a bicycle at a carnival
A 3D render of a tennis racket resting in a zen garden under soft studio lighting	A 3D render of a tennis racket with a orange ribbon in a zen garden	A 3D render of 2 tennis rackets in a zen garden	A 3D render of a tennis racket in a zen garden, centered	A 3D render of a tennis racket in a zen garden, in profile
An illustration of a drone racing in a sunrise field backlit with a subtle rim light	An illustration of a black drone in a sunrise field	An illustration of a drone in a sunrise field, top-down view	An illustration of a drone in a sunrise field, make it heart-shaped	An illustration of a drone in a sunrise field with moody low-key lighting
A photo of a lighthouse standing in a modern office	A photo of a lighthouse in a modern office, moved to the left side	A photo of a lighthouse in a modern office under neon lighting	A photo of a lighthouse in a modern office, overhead view	A photo of 5 lighthouses in a modern office
A watercolor painting of a sushi platter placed in a cozy kitchen, overhead view	A watercolor painting of a sushi platter in a cozy kitchen, wide-angle view	A watercolor painting of 5 sushi platters in a cozy kitchen	A watercolor painting of a sushi platter in a desert with dunes	A watercolor painting of a sushi platter in a cozy kitchen with fluorescent indoor lighting
A photo of an elephant running at a skate park	A photo of an elephant on a rainy street	A photo of an elephant at a skate park, isometric view	A photo of an elephant at a skate park with fluorescent indoor lighting	A photo of 3 elephants at a skate park
A photo of a painter standing at an open-air market, wide-angle view	A photo of a painter wearing a navy jacket at an open-air market	A photo of a painter in a cozy kitchen	A photo of a painter at an open-air market with moody low-key lighting	A photo of a painter in a white scarf at an open-air market
An oil painting of a castle sitting at a train station	An oil painting of a castle at a train station backlit with a subtle rim light	An oil painting of a castle underwater near coral	An oil painting of a castle with black flowers at a train station	An oil painting of a castle at a train station, shifted slightly downward
An illustration of a sailboat landing at a train station	An illustration of a sailboat at a train station with fluorescent indoor lighting	An illustration of a sailboat at a train station, shifted slightly upward	An illustration of a sailboat at a train station, make it round	An illustration of a black sailboat at a train station
A photo of a train racing by a riverbank backlit with a subtle rim light, wide-angle view	A photo of a train with 1 magenta stickers on the door by a riverbank	A photo of 4 trains by a riverbank	A photo of a train racing by a riverbank	A photo of an orange train by a riverbank
An illustration of a skateboard standing on a lake pier	An illustration of a bronze skateboard on a lake pier	An illustration of 4 skateboards on a lake pier	An illustration of a skateboard on a lake pier, facing left	An illustration of a skateboard on a lake pier, make it heart-shaped
An oil painting of a sand dune sitting on the moon	An oil painting of a sand dune painted navy on the moon	An oil painting of 3 sand dunes on the moon	An oil painting of a sand dune on the moon, centered	An oil painting of a sand dune on the moon with fluorescent indoor lighting
A 3D render of a cake placed under a thunderstorm sky	A 3D render of a cake under a thunderstorm sky, make it heart-shaped	A 3D render of a cake with a beige logo under a thunderstorm sky	A 3D render of a cake under a thunderstorm sky, top-down view	A 3D render of a cake under a thunderstorm sky under soft studio lighting
A watercolor painting of a mountain sitting on the moon with bright high-key lighting, isometric view	A watercolor painting of a mountain with beige flowers on the moon	A watercolor painting of a mountain on the moon with fluorescent indoor lighting	A watercolor painting of a mountain in a modern office	A watercolor painting of a mountain on the moon, facing left
An illustration of a camera standing on a rooftop, top-down view	An illustration of a camera on a rooftop, make it cylindrical	An illustration of a camera on a rooftop, moved to the right side	An illustration of a camera on a rooftop, in profile	An illustration of a camera with 4 green stickers on a rooftop
An illustration of a drone racing in a sunrise field	An illustration of 4 drones in a sunrise field	An illustration of a gold drone in a sunrise field	An illustration of a drone in a sunrise field, top-down view	An illustration of a drone with a orange decal in a sunrise field
A 3D render of a waterfall sitting on a soccer field, facing right	A 3D render of a waterfall with 4 silver birds in the branches on a soccer field	A 3D render of a waterfall on a rainy street	A 3D render of a waterfall on a soccer field with tiny fairy lights in the background	A 3D render of a waterfall with magenta flowers on a soccer field
An oil painting of a windmill standing on a basketball court	An oil painting of a windmill on a basketball court, placed in the background	An oil painting of a windmill at sunrise in a meadow	An oil painting of a windmill painted lime on a basketball court	An oil painting of a windmill on a basketball court with bright high-key lighting
A 3D render of a violinist running in a sunrise field	A 3D render of a violinist on a rainy street	A 3D render of a violinist painting in a sunrise field	A 3D render of a violinist holding a magenta book in a sunrise field	A 3D render of 2 violinists in a sunrise field
An oil painting of a sand dune sitting with a city skyline behind under golden-hour lighting	An oil painting of a sand dune with a city skyline behind, close-up	An oil painting of a sand dune on a snowy mountain	An oil painting of a sand dune with lavender flowers with a city skyline behind	An oil painting of a sand dune with a city skyline behind, shifted slightly downward
A watercolor painting of a flower bush sitting in a temple courtyard, overhead view	A watercolor painting of 4 flower bushes in a temple courtyard	A watercolor painting of a flower bush with lime leaves in a temple courtyard	A watercolor painting of a flower bush in a temple courtyard, close-up	A watercolor painting of a flower bush in a temple courtyard under golden-hour lighting
An oil painting of a bicycle sailing on a beach under soft studio lighting, wide-angle view	An oil painting of a bicycle on a beach, shifted slightly upward	An oil painting of a bicycle racing on a beach	An oil painting of a bicycle with a white decal on a beach	An oil painting of a bicycle on a beach, make it cylindrical
An oil painting of a flower bush sitting on a beach	An oil painting of 5 flower bushes on a beach	An oil painting of a flower bush with purple leaves on a beach	An oil painting of a flower bush on a beach, placed in the background	An oil painting of a flower bush underwater near coral
A 3D render of a mountain sitting on a rocky Mars landscape, wide-angle view	A 3D render of a mountain on a beach at sunset	A 3D render of a mountain with 1 blue lanterns hanging nearby on a rocky Mars landscape	A 3D render of 4 mountains on a rocky Mars landscape	A 3D render of a mountain on a rocky Mars landscape, in profile
An oil painting of a castle sitting in an art studio, close-up	An oil painting of a castle in an art studio with moody low-key lighting	An oil painting of a castle in an art studio, facing right	An oil painting of a castle at sunrise in a meadow	An oil painting of a castle with 2 beige lanterns hanging nearby in an art studio
A watercolor painting of a dancer taking a photo in a zen garden with bright high-key lighting	A watercolor painting of a dancer in a zen garden, moved to the left side	A watercolor painting of 3 dancers in a zen garden	A watercolor painting of a dancer in a zen garden with warm tungsten lighting	A watercolor painting of a dancer holding a teal book in a zen garden
A photo of a smartphone sitting at a cafe with tiny fairy lights in the background	A photo of a smartphone at a cafe, shifted slightly downward	A photo of 5 smartphones at a cafe	A photo of a smartphone at a cafe, make it triangular	A photo of a smartphone with 2 silver stickers at a cafe
A photo of an umbrella displayed at an open-air market	A photo of an umbrella with a lavender logo at an open-air market	A photo of an umbrella at an open-air market, wide-angle view	A photo of an umbrella at an open-air market, placed in the foreground	A photo of an umbrella at an open-air market with warm tungsten lighting
An illustration of a teapot displayed on a sunset beach, facing right	An illustration of a teapot with a blue ribbon on a sunset beach	An illustration of a green teapot on a sunset beach	An illustration of a teapot on a rainy street	An illustration of a teapot on a sunset beach, overhead view
An oil painting of an astronaut painting in a cyberpunk alley under golden-hour lighting, wide-angle view	An oil painting of an astronaut in a cyberpunk alley, close-up	An oil painting of an astronaut on a space station	An oil painting of an astronaut in a orange jacket in a cyberpunk alley	An oil painting of an astronaut wearing a orange jacket in a cyberpunk alley
A photo of a helicopter drifting in a garden	A photo of a helicopter in a garden, placed in the background	A photo of a helicopter in a desert with dunes	A photo of a cyan helicopter in a garden	A photo of a helicopter in a garden, make it heart-shaped
A watercolor painting of a mirror placed in a zen garden	A watercolor painting of a mirror in a modern office	A watercolor painting of a gold mirror in a zen garden	A watercolor painting of a mirror in a zen garden, make it round	A watercolor painting of a mirror in a zen garden, overhead view
A 3D render of an airplane parked in a classroom, facing forward	A 3D render of an airplane drifting in a classroom	A 3D render of an airplane in a classroom, make it round	A 3D render of an airplane in a classroom, moved to the right side	A 3D render of an airplane in a classroom, wide-angle view
An illustration of a waterfall sitting in an art studio under neon lighting, facing left	An illustration of a waterfall with a blue rainbow in the sky in an art studio	An illustration of a waterfall in an art studio, shifted slightly downward	An illustration of 5 waterfalls in an art studio	An illustration of a waterfall painted bronze in an art studio
An illustration of a statue resting with a city skyline behind under neon lighting, in profile	An illustration of a statue with a city skyline behind under overcast light	An illustration of 2 statues with a city skyline behind	An illustration of a statue with a city skyline behind, make it square-shaped	An illustration of a statue on a beach at sunset
A watercolor painting of a horse lying down inside an airport terminal	A watercolor painting of a horse with navy feathers inside an airport terminal	A watercolor painting of a horse sleeping inside an airport terminal	A watercolor painting of a horse inside an airport terminal with bright high-key lighting	A watercolor painting of a horse in a cozy kitchen
An illustration of a clock displayed at an open-air market with tiny fairy lights in the background	An illustration of a clock at an open-air market, moved to the left side	An illustration of a clock at an open-air market, top-down view	An illustration of a beige clock at an open-air market	An illustration of a clock with a cyan logo at an open-air market
An oil painting of a soccer player sitting in a forest	An oil painting of a soccer player in a silver dress in a forest	An oil painting of 3 soccer players in a forest	An oil painting of a soccer player in a forest backlit with a subtle rim light	An oil painting of a soccer player in a forest, close-up
A photo of a burger standing at an amusement park with warm tungsten lighting, wide-angle view	A photo of a burger underwater near coral	A photo of a burger at an amusement park, shifted slightly downward	A photo of a gold burger at an amusement park	A photo of a burger with a yellow ribbon at an amusement park
A photo of a whale diving in a classroom under golden-hour lighting	A photo of 5 whales in a classroom	A photo of a whale in a classroom, placed in the background	A photo of a whale in a classroom, top-down view	A photo of a whale in a desert with dunes
An oil painting of a train flying on a lake pier under neon lighting, in profile	An oil painting of a train on a lake pier, placed in the background	An oil painting of a train moving on a lake pier	An oil painting of 4 trains on a lake pier	An oil painting of a train on a lake pier with warm tungsten lighting
A 3D render of a dancer surfing with a city skyline behind, close-up	A 3D render of a dancer with a city skyline behind, moved to the left side	A 3D render of 5 dancers with a city skyline behind	A 3D render of a dancer on a snowy mountain	A 3D render of a dancer typing with a city skyline behind
A photo of a soccer ball sitting in a mountain meadow	A photo of a soccer ball by a waterfall	A photo of a soccer ball in a mountain meadow, make it heart-shaped	A photo of a soccer ball in a mountain meadow, facing right	A photo of 4 soccer balls in a mountain meadow
An illustration of a cat running with a city skyline behind	An illustration of a cat with orange scales with a city skyline behind	An illustration of a cat jumping with a city skyline behind	An illustration of a cat in a neon-lit city at night	An illustration of a cat with a city skyline behind with bright high-key lighting
A 3D render of a yoga practitioner typing on a neon-lit street at night under overcast light, facing right	A 3D render of a yoga practitioner on a neon-lit street at night backlit with a subtle rim light	A 3D render of a yoga practitioner holding a silver guitar on a neon-lit street at night	A 3D render of a yoga practitioner reading on a neon-lit street at night	A 3D render of a yoga practitioner in a yellow hat on a neon-lit street at night
An oil painting of a soccer player taking a photo at a carnival, top-down view	An oil painting of a soccer player playing guitar at a carnival	An oil painting of 2 soccer players at a carnival	An oil painting of a soccer player at a carnival with fluorescent indoor lighting	An oil painting of a soccer player in a maroon jacket at a carnival
A watercolor painting of an astronaut hiking in a mountain meadow	A watercolor painting of an astronaut in a mountain meadow, facing forward	A watercolor painting of an astronaut sitting in a mountain meadow	A watercolor painting of an astronaut in a red scarf in a mountain meadow	A watercolor painting of an astronaut in a mountain meadow, shifted slightly upward
A photo of a dog jumping in a garden with tiny fairy lights in the background	A photo of 4 dogs in a garden	A photo of a dog in a garden, moved to the left side	A photo of a dog in a desert with dunes	A photo of a dog wearing yellow glasses in a garden
A 3D render of a violinist skating on a lake pier under golden-hour lighting, top-down view	A 3D render of a violinist in a maroon jacket on a lake pier	A 3D render of 4 violinists on a lake pier	A 3D render of a violinist on a lake pier, overhead view	A 3D render of a violinist on a lake pier backlit with a subtle rim light
A watercolor painting of an eagle spreading wings in a sunrise field under golden-hour lighting, top-down view	A watercolor painting of an eagle in a sunrise field, centered	A watercolor painting of an eagle with navy scales in a sunrise field	A watercolor painting of 4 eagles in a sunrise field	A watercolor painting of an eagle on a rainy street
A watercolor painting of a flower bush sitting at a cafe with bright high-key lighting, in profile	A watercolor painting of a flower bush with a brown rainbow in the sky at a cafe	A watercolor painting of a flower bush at a cafe, placed in the background	A watercolor painting of a flower bush at a cafe with tiny fairy lights in the background	A watercolor painting of a flower bush on a snowy mountain
An oil painting of a windmill standing on a sunset beach with moody low-key lighting	An oil painting of a windmill on a sunset beach under neon lighting	An oil painting of a windmill with brown flowers on a sunset beach	An oil painting of a windmill with 2 beige birds in the branches on a sunset beach	An oil painting of a windmill on a sunset beach, moved to the left side
An illustration of a sand dune sitting inside an airport terminal, facing left	An illustration of a sand dune inside an airport terminal backlit with a subtle rim light	An illustration of a sand dune with magenta flowers inside an airport terminal	An illustration of a sand dune inside an airport terminal, in profile	An illustration of a sand dune inside an airport terminal, shifted slightly upward
An oil painting of a waterfall sitting by a riverbank with bright high-key lighting	An oil painting of a waterfall with a silver rainbow in the sky by a riverbank	An oil painting of a waterfall at a carnival	An oil painting of a waterfall by a riverbank, moved to the left side	An oil painting of 3 waterfalls by a riverbank
An oil painting of a boat sailing inside a cave backlit with a subtle rim light	An oil painting of a boat inside a cave, facing right	An oil painting of a boat inside a cave, placed in the background	An oil painting of 2 boats inside a cave	An oil painting of a boat on a snowy mountain
An illustration of a painting sitting on a farm, wide-angle view	An illustration of a blue painting on a farm	An illustration of a painting on a farm, shifted slightly downward	An illustration of a painting on a farm, wide-angle view	An illustration of a painting on a farm, make it cylindrical
A 3D render of a bear running on a music stage	A 3D render of a bear on a music stage, shifted slightly upward	A 3D render of a bear on a music stage with warm tungsten lighting	A 3D render of 4 bears on a music stage	A 3D render of a bear wearing a gold bandana on a music stage
A watercolor painting of a laptop displayed at an amusement park under golden-hour lighting, facing left	A watercolor painting of a laptop at an amusement park, make it heart-shaped	A watercolor painting of a bronze laptop at an amusement park	A watercolor painting of a laptop with a brown logo at an amusement park	A watercolor painting of a laptop at an amusement park under neon lighting
A photo of a castle sitting at a cafe under overcast light	A photo of 2 castles at a cafe	A photo of a castle at a cafe, shifted slightly downward	A photo of a castle with 2 lavender lanterns hanging nearby at a cafe	A photo of a castle with pink flowers at a cafe
A 3D render of a helicopter flying in a forest	A 3D render of 5 helicopters in a forest	A 3D render of a helicopter in a forest, overhead view	A 3D render of a helicopter in a desert with dunes	A 3D render of a helicopter drifting in a forest
A 3D render of a bridge sitting underwater near a coral reef with bright high-key lighting	A 3D render of a bridge underwater near a coral reef, moved to the left side	A 3D render of a bridge underwater near a coral reef with tiny fairy lights in the background	A 3D render of a bridge underwater near a coral reef, isometric view	A 3D render of a bridge with 1 maroon lanterns hanging nearby underwater near a coral reef
A 3D render of a watch placed in a forest under overcast light	A 3D render of a blue watch in a forest	A 3D render of a watch by a waterfall	A 3D render of a watch in a forest, overhead view	A 3D render of a watch in a forest, centered
A 3D render of a tiger sleeping at a carnival with bright high-key lighting, facing right	A 3D render of a tiger wearing yellow glasses at a carnival	A 3D render of a tiger sleeping at a carnival	A 3D render of a tiger at a carnival, overhead view	A 3D render of a tiger underwater near coral
A 3D render of a horse jumping in a castle hall	A 3D render of a horse with white shell in a castle hall	A 3D render of a horse wearing bronze glasses in a castle hall	A 3D render of a horse running in a castle hall	A 3D render of 2 horses in a castle hall
A photo of a sand dune sitting on a sunset beach, isometric view	A photo of a sand dune on a sunset beach, top-down view	A photo of a sand dune on the moon surface	A photo of a sand dune on a sunset beach with moody low-key lighting	A photo of a sand dune on a sunset beach, centered
An oil painting of an airplane moving at an amusement park with fluorescent indoor lighting	An oil painting of a pink airplane at an amusement park	An oil painting of an airplane at an amusement park, make it triangular	An oil painting of an airplane on a beach at sunset	An oil painting of an airplane taking off at an amusement park
A watercolor painting of a tiger sleeping in a cyberpunk alley	A watercolor painting of a tiger wearing magenta glasses in a cyberpunk alley	A watercolor painting of a tiger on a space station	A watercolor painting of a tiger with navy scales in a cyberpunk alley	A watercolor painting of a tiger sleeping in a cyberpunk alley
A watercolor painting of a parrot perched in a medieval village under overcast light	A watercolor painting of a parrot in a zen garden	A watercolor painting of a parrot in a medieval village, facing right	A watercolor painting of a parrot in a medieval village, moved to the right side	A watercolor painting of a parrot in a medieval village with bright high-key lighting
A watercolor painting of a drone taking off in a sci-fi corridor	A watercolor painting of a maroon drone in a sci-fi corridor	A watercolor painting of 2 drones in a sci-fi corridor	A watercolor painting of a drone in a sci-fi corridor, shifted slightly downward	A watercolor painting of a drone in a sci-fi corridor, wide-angle view
A photo of a horse walking in a modern office with warm tungsten lighting, facing forward	A photo of a horse in a modern office with fluorescent indoor lighting	A photo of a horse on a space station	A photo of a horse wearing a maroon hat in a modern office	A photo of a horse with white fur in a modern office
A watercolor painting of a castle sitting inside an airport terminal	A watercolor painting of a castle inside an airport terminal, overhead view	A watercolor painting of a castle inside an airport terminal with fluorescent indoor lighting	A watercolor painting of a castle with navy leaves inside an airport terminal	A watercolor painting of a castle with 1 blue birds in the branches inside an airport terminal
An illustration of a frog sleeping at a skate park	An illustration of a frog sleeping at a skate park	An illustration of a frog with magenta scales at a skate park	An illustration of a frog on a space station	An illustration of a frog wearing a lavender cape at a skate park
A 3D render of a photographer surfing in outer space with tiny fairy lights in the background	A 3D render of a photographer in outer space with moody low-key lighting	A 3D render of a photographer in a red jacket in outer space	A 3D render of 3 photographers in outer space	A 3D render of a photographer in outer space, facing right
An oil painting of a yoga practitioner standing in a cozy kitchen	An oil painting of a yoga practitioner holding a beige coffee cup in a cozy kitchen	An oil painting of a yoga practitioner in a cozy kitchen, facing forward	An oil painting of a yoga practitioner in a cozy kitchen under neon lighting	An oil painting of a yoga practitioner in a neon-lit city at night
An oil painting of a motorcycle moving inside a library, close-up	An oil painting of a motorcycle taking off inside a library	An oil painting of a beige motorcycle inside a library	An oil painting of a motorcycle inside a library with bright high-key lighting	An oil painting of a motorcycle inside a library, centered
An oil painting of a basketball player surfing inside an airport terminal	An oil painting of a basketball player inside an airport terminal, shifted slightly upward	An oil painting of a basketball player inside an airport terminal, top-down view	An oil painting of 4 basketball players inside an airport terminal	An oil painting of a basketball player in a maroon dress inside an airport terminal
An oil painting of an airplane flying in a zen garden, overhead view	An oil painting of an airplane in a zen garden, wide-angle view	An oil painting of an airplane in a zen garden with fluorescent indoor lighting	An oil painting of an airplane with a red roof rack in a zen garden	An oil painting of 2 airplanes in a zen garden
A 3D render of a deer playing on a music stage, facing right	A 3D render of a deer on a music stage with bright high-key lighting	A 3D render of a deer on a music stage, wide-angle view	A 3D render of a deer wearing a teal hat on a music stage	A 3D render of a deer on a music stage, shifted slightly upward
An illustration of a runner surfing in a sci-fi corridor	An illustration of a runner wearing a orange hat in a sci-fi corridor	An illustration of a runner at sunrise in a meadow	An illustration of a runner in a sci-fi corridor, placed in the foreground	An illustration of a runner in a sci-fi corridor, facing right
A 3D render of a flower bush sitting in outer space, facing forward	A 3D render of a flower bush in outer space, shifted slightly upward	A 3D render of 3 flower bushes in outer space	A 3D render of a flower bush in outer space, overhead view	A 3D render of a flower bush with pink flowers in outer space
A photo of a clock displayed in a medieval village	A photo of a clock in a medieval village, make it heart-shaped	A photo of a blue clock in a medieval village	A photo of a clock underwater near coral	A photo of a clock in a medieval village backlit with a subtle rim light
A watercolor painting of a lighthouse standing on a rocky Mars landscape	A watercolor painting of a lighthouse with maroon leaves on a rocky Mars landscape	A watercolor painting of 4 lighthouses on a rocky Mars landscape	A watercolor painting of a lighthouse on a rocky Mars landscape under golden-hour lighting	A watercolor painting of a lighthouse on a rocky Mars landscape, shifted slightly upward
A watercolor painting of a bridge sitting under a thunderstorm sky	A watercolor painting of a bridge inside a library	A watercolor painting of a bridge under a thunderstorm sky, facing forward	A watercolor painting of a bridge painted silver under a thunderstorm sky	A watercolor painting of a bridge under a thunderstorm sky under neon lighting
A photo of a pizza standing by a riverbank	A photo of a pizza by a riverbank, placed in the background	A photo of 5 pizzas by a riverbank	A photo of a pizza by a riverbank, make it round	A photo of a pizza with a green ribbon by a riverbank
A 3D render of a cake resting in a castle hall with fluorescent indoor lighting, in profile	A 3D render of a cake in a castle hall, moved to the right side	A 3D render of a cake on the moon surface	A 3D render of a cake in a castle hall, overhead view	A 3D render of a cake in a castle hall, make it cylindrical
A watercolor painting of a parrot spreading wings on a lake pier	A watercolor painting of a parrot on a lake pier with bright high-key lighting	A watercolor painting of a parrot wearing a purple cape on a lake pier	A watercolor painting of a parrot on a snowy mountain	A watercolor painting of a parrot with maroon scales on a lake pier
A 3D render of a guitarist standing inside an airport terminal backlit with a subtle rim light	A 3D render of a guitarist in a purple scarf inside an airport terminal	A 3D render of 4 guitarists inside an airport terminal	A 3D render of a guitarist wearing a magenta scarf inside an airport terminal	A 3D render of a guitarist dancing inside an airport terminal
A 3D render of a bus taking off at an open-air market	A 3D render of a bus moving at an open-air market	A 3D render of a bus at an open-air market, placed in the background	A 3D render of a bus at an open-air market with bright high-key lighting	A 3D render of a bus at a carnival
An illustration of a bus moving on a soccer field, wide-angle view	An illustration of a gold bus on a soccer field	An illustration of 5 buses on a soccer field	An illustration of a bus on a soccer field, make it heart-shaped	An illustration of a bus on a soccer field, centered
A watercolor painting of a chef juggling on a sunset beach	A watercolor painting of a chef on a sunset beach with bright high-key lighting	A watercolor painting of a chef in a red jacket on a sunset beach	A watercolor painting of a chef in a flower garden	A watercolor painting of a chef doing a yoga pose on a sunset beach
An oil painting of a photographer playing guitar in a cyberpunk alley with moody low-key lighting	An oil painting of a photographer standing in a cyberpunk alley	An oil painting of a photographer in a cyberpunk alley with fluorescent indoor lighting	An oil painting of a photographer in a cyberpunk alley, isometric view	An oil painting of a photographer holding a blue balloon in a cyberpunk alley
An illustration of a guitarist painting on a neon-lit street at night under neon lighting, facing forward	An illustration of a guitarist in a yellow shirt on a neon-lit street at night	An illustration of 4 guitarists on a neon-lit street at night	An illustration of a guitarist in a cozy kitchen	An illustration of a guitarist on a neon-lit street at night, moved to the left side
An oil painting of an elephant walking in a castle hall	An oil painting of an elephant wearing orange glasses in a castle hall	An oil painting of 2 elephants in a castle hall	An oil painting of an elephant inside a library	An oil painting of an elephant with pink fur in a castle hall
A 3D render of a yoga practitioner standing in a city street	A 3D render of a yoga practitioner in a city street with tiny fairy lights in the background	A 3D render of a yoga practitioner in a cyan dress in a city street	A 3D render of a yoga practitioner in a city street, facing forward	A 3D render of a yoga practitioner wearing magenta glasses in a city street
An illustration of a parrot gliding near a waterfall under overcast light	An illustration of a parrot near a waterfall, facing right	An illustration of 3 parrots near a waterfall	An illustration of a parrot with silver scales near a waterfall	An illustration of a parrot on a lake pier
A photo of a boat taking off in a forest under golden-hour lighting, overhead view	A photo of 2 boats in a forest	A photo of a boat in a forest, make it round	A photo of a boat in a neon-lit city at night	A photo of a boat in a forest with moody low-key lighting
An oil painting of an airplane drifting in a desert with tiny fairy lights in the background, facing right	An oil painting of 2 airplanes in a desert	An oil painting of an airplane in a desert, make it square-shaped	An oil painting of a silver airplane in a desert	An oil painting of an airplane with 1 red balloons tied to it in a desert
A watercolor painting of an airplane sailing with a city skyline behind under overcast light, facing right	A watercolor painting of an airplane with a city skyline behind, make it cylindrical	A watercolor painting of an airplane with a city skyline behind under overcast light	A watercolor painting of an airplane inside a library	A watercolor painting of an airplane with a pink roof rack with a city skyline behind
A 3D render of a windmill standing by a riverbank	A 3D render of a windmill by a riverbank, facing forward	A 3D render of a windmill painted pink by a riverbank	A 3D render of a windmill with 3 green lanterns hanging nearby by a riverbank	A 3D render of 5 windmills by a riverbank
A 3D render of a violinist sitting in a forest	A 3D render of a violinist in a beige shirt in a forest	A 3D render of a violinist holding a yellow camera in a forest	A 3D render of a violinist in a modern office	A 3D render of 5 violinists in a forest
An oil painting of a teapot placed in a castle hall under golden-hour lighting, close-up	An oil painting of a teapot in a castle hall, make it cylindrical	An oil painting of 4 teapots in a castle hall	An oil painting of a teapot in a castle hall, in profile	An oil painting of a teapot in a castle hall with tiny fairy lights in the background
A 3D render of a rabbit jumping at a cafe, overhead view	A 3D render of a rabbit with black scales at a cafe	A 3D render of a rabbit at a cafe with fluorescent indoor lighting	A 3D render of 4 rabbits at a cafe	A 3D render of a rabbit at a cafe, overhead view
A 3D render of a surfer dancing in outer space	A 3D render of a surfer smiling in outer space	A 3D render of a surfer holding a purple book in outer space	A 3D render of a surfer in a neon-lit city at night	A 3D render of a surfer in outer space with tiny fairy lights in the background
An illustration of a book displayed in a temple courtyard	An illustration of a book in a temple courtyard, shifted slightly downward	An illustration of 3 books in a temple courtyard	An illustration of a book in a temple courtyard, make it round	An illustration of a book in a modern office
A photo of an eagle gliding in a snowy field	A photo of an eagle in a snowy field, placed in the foreground	A photo of an eagle in a snowy field with tiny fairy lights in the background	A photo of 2 eagles in a snowy field	A photo of an eagle spreading wings in a snowy field
A photo of an eagle gliding in a sci-fi corridor under overcast light, facing forward	A photo of an eagle in a sci-fi corridor, top-down view	A photo of an eagle in a sci-fi corridor with moody low-key lighting	A photo of an eagle wearing beige glasses in a sci-fi corridor	A photo of 2 eagles in a sci-fi corridor
A photo of a dancer playing guitar in a temple courtyard with moody low-key lighting	A photo of a dancer wearing a silver jacket in a temple courtyard	A photo of a dancer posing in a temple courtyard	A photo of a dancer in a temple courtyard, facing left	A photo of a dancer in a maroon jacket in a temple courtyard
An illustration of a hiker reading with a city skyline behind under golden-hour lighting	An illustration of 2 hikers with a city skyline behind	An illustration of a hiker with a city skyline behind, placed in the background	An illustration of a hiker in a desert with dunes	An illustration of a hiker with a city skyline behind with bright high-key lighting
A photo of a statue displayed in outer space backlit with a subtle rim light, close-up	A photo of a statue in outer space with bright high-key lighting	A photo of a statue in outer space, wide-angle view	A photo of 3 statues in outer space	A photo of a statue in outer space, placed in the foreground
A watercolor painting of a pagoda standing in a zen garden with warm tungsten lighting	A watercolor painting of a pagoda in a zen garden, isometric view	A watercolor painting of a pagoda in a zen garden, placed in the foreground	A watercolor painting of a pagoda in a zen garden with fluorescent indoor lighting	A watercolor painting of a pagoda with a red rainbow in the sky in a zen garden
A 3D render of a castle sitting in a sunrise field under soft studio lighting	A 3D render of 3 castles in a sunrise field	A 3D render of a castle in a sunrise field, moved to the right side	A 3D render of a castle in a sunrise field under overcast light	A 3D render of a castle on a beach at sunset
A photo of a chef running in a foggy forest, top-down view	A photo of a chef in a silver scarf in a foggy forest	A photo of a chef in a foggy forest, placed in the background	A photo of a chef in a foggy forest with moody low-key lighting	A photo of a chef at a carnival
A watercolor painting of a painting placed in an art studio, overhead view	A watercolor painting of a painting in an art studio, make it round	A watercolor painting of a painting in an art studio, moved to the right side	A watercolor painting of a painting in an art studio, facing forward	A watercolor painting of a painting on a snowy mountain
A watercolor painting of a bridge sitting in a temple courtyard under overcast light, facing left	A watercolor painting of a bridge in a temple courtyard under golden-hour lighting	A watercolor painting of a bridge with 2 green butterflies around in a temple courtyard	A watercolor painting of 4 bridges in a temple courtyard	A watercolor painting of a bridge in a temple courtyard, isometric view
A photo of a cyclist sitting in a cozy kitchen under soft studio lighting, facing forward	A photo of a cyclist in a cozy kitchen, shifted slightly downward	A photo of a cyclist in a silver shirt in a cozy kitchen	A photo of a cyclist holding a blue guitar in a cozy kitchen	A photo of a cyclist dancing in a cozy kitchen
An oil painting of a horse running on a rocky Mars landscape, isometric view	An oil painting of 4 horses on a rocky Mars landscape	An oil painting of a horse with black feathers on a rocky Mars landscape	An oil painting of a horse on a rocky Mars landscape, shifted slightly downward	An oil painting of a horse wearing magenta glasses on a rocky Mars landscape
An oil painting of a lighthouse standing on a basketball court with tiny fairy lights in the background, isometric view	An oil painting of a lighthouse on a basketball court, shifted slightly downward	An oil painting of a lighthouse on a basketball court, wide-angle view	An oil painting of 3 lighthouses on a basketball court	An oil painting of a lighthouse with orange flowers on a basketball court
A watercolor painting of a tree standing on a soccer field	A watercolor painting of a tree at sunrise in a meadow	A watercolor painting of 4 trees on a soccer field	A watercolor painting of a tree with 1 green lanterns hanging nearby on a soccer field	A watercolor painting of a tree on a soccer field, shifted slightly upward
An illustration of a basketball player playing guitar on a music stage	An illustration of a basketball player wearing a green scarf on a music stage	An illustration of a basketball player smiling on a music stage	An illustration of a basketball player in a black jacket on a music stage	An illustration of a basketball player on a music stage, placed in the foreground
A photo of a flower bush sitting in a sunrise field with bright high-key lighting	A photo of a flower bush with 3 teal birds in the branches in a sunrise field	A photo of a flower bush in a sunrise field with fluorescent indoor lighting	A photo of a flower bush on a space station	A photo of a flower bush in a sunrise field, moved to the right side
A watercolor painting of a skateboarder posing at a train station with warm tungsten lighting	A watercolor painting of a skateboarder at a train station with tiny fairy lights in the background	A watercolor painting of a skateboarder at a train station, shifted slightly upward	A watercolor painting of a skateboarder at a train station, facing left	A watercolor painting of a skateboarder in a neon-lit city at night
An oil painting of a photographer hiking in a cozy kitchen	An oil painting of a photographer in a cozy kitchen, wide-angle view	An oil painting of a photographer dancing in a cozy kitchen	An oil painting of a photographer holding a navy skateboard in a cozy kitchen	An oil painting of a photographer in a navy jacket in a cozy kitchen
A 3D render of a burger displayed underwater near a coral reef, facing left	A 3D render of a burger underwater near a coral reef, facing right	A 3D render of a beige burger underwater near a coral reef	A 3D render of a burger underwater near a coral reef with moody low-key lighting	A 3D render of a burger underwater near a coral reef, centered
An oil painting of a sand dune sitting in a temple courtyard, overhead view	An oil painting of a sand dune with 1 white lanterns hanging nearby in a temple courtyard	An oil painting of 2 sand dunes in a temple courtyard	An oil painting of a sand dune in a temple courtyard under soft studio lighting	An oil painting of a sand dune on a lake pier
A 3D render of a train flying by a riverbank under overcast light, facing left	A 3D render of a train by a riverbank, moved to the left side	A 3D render of 5 trains by a riverbank	A 3D render of a train in a neon-lit city at night	A 3D render of a train by a riverbank with fluorescent indoor lighting
A watercolor painting of a soccer player standing in a foggy forest, wide-angle view	A watercolor painting of a soccer player holding a beige coffee cup in a foggy forest	A watercolor painting of a soccer player in a foggy forest, top-down view	A watercolor painting of a soccer player in a foggy forest, placed in the foreground	A watercolor painting of 4 soccer players in a foggy forest
A 3D render of an astronaut taking a photo on a neon-lit street at night under neon lighting, top-down view	A 3D render of an astronaut underwater near coral	A 3D render of an astronaut posing on a neon-lit street at night	A 3D render of 5 astronauts on a neon-lit street at night	A 3D render of an astronaut wearing a cyan scarf on a neon-lit street at night
An illustration of a mirror standing in a zen garden under overcast light, isometric view	An illustration of a mirror with a beige logo in a zen garden	An illustration of a mirror in a zen garden, make it cylindrical	An illustration of a mirror in a zen garden, shifted slightly upward	An illustration of 2 mirrors in a zen garden
A 3D render of a bicycle landing in a mountain meadow, wide-angle view	A 3D render of a bicycle in a mountain meadow, close-up	A 3D render of a bicycle in a mountain meadow with warm tungsten lighting	A 3D render of a bicycle in a mountain meadow, make it cylindrical	A 3D render of 5 bicycles in a mountain meadow
A photo of a frog playing underwater near a coral reef, facing right	A photo of a frog running underwater near a coral reef	A photo of a frog underwater near a coral reef with tiny fairy lights in the background	A photo of a frog with orange shell underwater near a coral reef	A photo of a frog underwater near a coral reef, isometric view
An illustration of a book sitting underwater near a coral reef	An illustration of a cyan book underwater near a coral reef	An illustration of a book with 4 brown stickers underwater near a coral reef	An illustration of a book at sunrise in a meadow	An illustration of a book underwater near a coral reef backlit with a subtle rim light
An oil painting of an astronaut smiling on a basketball court	An oil painting of an astronaut on a basketball court, facing left	An oil painting of an astronaut inside a library	An oil painting of an astronaut in a orange dress on a basketball court	An oil painting of an astronaut on a basketball court under soft studio lighting
A watercolor painting of a photographer jumping in a medieval village	A watercolor painting of a photographer in a medieval village, isometric view	A watercolor painting of a photographer in a lavender jacket in a medieval village	A watercolor painting of a photographer wearing teal glasses in a medieval village	A watercolor painting of a photographer jumping in a medieval village
An oil painting of a surfer skating in a forest	An oil painting of a surfer in a navy scarf in a forest	An oil painting of a surfer in a forest under golden-hour lighting	An oil painting of a surfer in a cozy kitchen	An oil painting of 4 surfers in a forest
An illustration of a helicopter drifting in a classroom	An illustration of a purple helicopter in a classroom	An illustration of a helicopter in a classroom, facing right	An illustration of 4 helicopters in a classroom	An illustration of a helicopter in a classroom under golden-hour lighting
A watercolor painting of an airplane sailing in a garden	A watercolor painting of an airplane with a cyan roof rack in a garden	A watercolor painting of an airplane in a garden, make it round	A watercolor painting of an airplane landing in a garden	A watercolor painting of an airplane on a snowy mountain
A photo of a violin displayed on a sunset beach with tiny fairy lights in the background	A photo of a violin on a sunset beach, moved to the left side	A photo of a violin with a orange ribbon on a sunset beach	A photo of a gold violin on a sunset beach	A photo of 2 violins on a sunset beach
A photo of a sand dune sitting by a riverbank	A photo of 5 sand dunes by a riverbank	A photo of a sand dune with 1 lavender butterflies around by a riverbank	A photo of a sand dune by a riverbank under neon lighting	A photo of a sand dune on a lake pier
A watercolor painting of a hat sitting in an art studio, top-down view	A watercolor painting of a hat in an art studio, make it heart-shaped	A watercolor painting of 3 hats in an art studio	A watercolor painting of a hat in an art studio, close-up	A watercolor painting of a hat with 5 purple stickers in an art studio
A watercolor painting of a car sailing in a snowy field	A watercolor painting of a car in a snowy field with fluorescent indoor lighting	A watercolor painting of a car sailing in a snowy field	A watercolor painting of a car in a snowy field, make it cylindrical	A watercolor painting of 3 cars in a snowy field
A watercolor painting of a train parked in a medieval village	A watercolor painting of a train at a carnival	A watercolor painting of a train in a medieval village, make it triangular	A watercolor painting of a train in a medieval village under neon lighting	A watercolor painting of a blue train in a medieval village
A 3D render of a penguin flying on a basketball court	A 3D render of a penguin with a cyan collar on a basketball court	A 3D render of a penguin on a basketball court under golden-hour lighting	A 3D render of 2 penguins on a basketball court	A 3D render of a penguin with maroon feathers on a basketball court
A photo of a rabbit sleeping at a carnival, isometric view	A photo of a rabbit in a modern office	A photo of a rabbit playing at a carnival	A photo of a rabbit at a carnival, top-down view	A photo of 4 rabbits at a carnival
A watercolor painting of a bridge sitting on a lake pier under overcast light, top-down view	A watercolor painting of a bridge in a desert with dunes	A watercolor painting of 2 bridges on a lake pier	A watercolor painting of a bridge on a lake pier backlit with a subtle rim light	A watercolor painting of a bridge with 4 orange lanterns hanging nearby on a lake pier
A photo of a violin displayed in a castle hall	A photo of a violin on a beach at sunset	A photo of a violin in a castle hall, placed in the background	A photo of a magenta violin in a castle hall	A photo of 2 violins in a castle hall
An illustration of a tree standing in a snowy field	An illustration of a tree with 4 green birds in the branches in a snowy field	An illustration of a tree with purple flowers in a snowy field	An illustration of a tree on a beach at sunset	An illustration of a tree in a snowy field, isometric view
A watercolor painting of a tiger sitting on a neon-lit street at night under golden-hour lighting	A watercolor painting of a tiger on the moon surface	A watercolor painting of 3 tigers on a neon-lit street at night	A watercolor painting of a tiger on a neon-lit street at night, facing forward	A watercolor painting of a tiger with silver feathers on a neon-lit street at night
An oil painting of a sand dune sitting in a foggy forest	An oil painting of 2 sand dunes in a foggy forest	An oil painting of a sand dune in a foggy forest, facing left	An oil painting of a sand dune in a foggy forest under golden-hour lighting	An oil painting of a sand dune painted black in a foggy forest
A 3D render of a truck drifting on the moon, facing left	A 3D render of a truck on the moon under neon lighting	A 3D render of 3 trucks on the moon	A 3D render of a truck on the moon, make it round	A 3D render of a truck on the moon, overhead view
A watercolor painting of a helicopter flying inside a cave under overcast light, facing forward	A watercolor painting of a helicopter inside a cave, facing right	A watercolor painting of 5 helicopters inside a cave	A watercolor painting of a helicopter moving inside a cave	A watercolor painting of a helicopter inside a cave, placed in the background
A photo of a skateboarder playing guitar under a thunderstorm sky, top-down view	A photo of a skateboarder in a pink dress under a thunderstorm sky	A photo of a skateboarder wearing a teal scarf under a thunderstorm sky	A photo of a skateboarder under a thunderstorm sky, moved to the right side	A photo of a skateboarder sitting under a thunderstorm sky
A photo of a turtle diving in an art studio	A photo of a turtle with beige feathers in an art studio	A photo of a turtle in an art studio, placed in the background	A photo of a turtle swimming in an art studio	A photo of a turtle in an art studio under neon lighting
A watercolor painting of a drone sailing at a skate park, in profile	A watercolor painting of a drone at a skate park, facing left	A watercolor painting of a magenta drone at a skate park	A watercolor painting of a drone sailing at a skate park	A watercolor painting of a drone at a skate park, moved to the left side
A photo of a dancer painting in a cozy kitchen, facing left	A photo of 3 dancers in a cozy kitchen	A photo of a dancer at sunrise in a meadow	A photo of a dancer in a cozy kitchen with warm tungsten lighting	A photo of a dancer wearing a brown scarf in a cozy kitchen
A watercolor painting of a statue standing in a sunrise field, isometric view	A watercolor painting of a statue in a sunrise field, make it round	A watercolor painting of a statue in a sunrise field, shifted slightly upward	A watercolor painting of a statue in a sunrise field, wide-angle view	A watercolor painting of a black statue in a sunrise field
An oil painting of a soccer player running in a foggy forest	An oil painting of a soccer player in a foggy forest, close-up	An oil painting of a soccer player in a pink hat in a foggy forest	An oil painting of a soccer player doing a yoga pose in a foggy forest	An oil painting of a soccer player in a foggy forest, placed in the foreground
A 3D render of a photographer typing on a beach	A 3D render of a photographer carrying a red backpack on a beach	A 3D render of a photographer in a cozy kitchen	A 3D render of a photographer in a green scarf on a beach	A 3D render of a photographer dancing on a beach
A photo of an astronaut painting on a soccer field	A photo of an astronaut on a soccer field, placed in the background	A photo of an astronaut on a soccer field with bright high-key lighting	A photo of an astronaut on a soccer field, in profile	A photo of an astronaut underwater near coral
An oil painting of a lighthouse standing in a medieval village	An oil painting of a lighthouse with 2 navy lanterns hanging nearby in a medieval village	An oil painting of a lighthouse on a snowy mountain	An oil painting of a lighthouse in a medieval village under neon lighting	An oil painting of 4 lighthouses in a medieval village
A photo of a dolphin leaping out of the water under a thunderstorm sky with tiny fairy lights in the background	A photo of a dolphin wearing a white cape under a thunderstorm sky	A photo of a dolphin under a thunderstorm sky, close-up	A photo of a dolphin swimming under a thunderstorm sky	A photo of a dolphin with black fur under a thunderstorm sky
An illustration of a cyclist sitting on a beach	An illustration of a cyclist on a beach, shifted slightly downward	An illustration of 2 cyclists on a beach	An illustration of a cyclist on a beach under neon lighting	An illustration of a cyclist posing on a beach
A watercolor painting of a painter reading in a modern office with bright high-key lighting, top-down view	A watercolor painting of a painter in a modern office, centered	A watercolor painting of 3 painters in a modern office	A watercolor painting of a painter holding a gold microphone in a modern office	A watercolor painting of a painter running in a modern office
A 3D render of a mountain sitting in a modern office, in profile	A 3D render of a mountain in a modern office, wide-angle view	A 3D render of a mountain in a modern office, centered	A 3D render of a mountain in a modern office with bright high-key lighting	A 3D render of 5 mountains in a modern office
A 3D render of a wolf sitting with a city skyline behind under neon lighting, wide-angle view	A 3D render of a wolf with a city skyline behind with bright high-key lighting	A 3D render of a wolf with a city skyline behind, in profile	A 3D render of a wolf sleeping with a city skyline behind	A 3D render of a wolf wearing teal glasses with a city skyline behind
A photo of a train moving on a beach with warm tungsten lighting	A photo of 3 trains on a beach	A photo of a train on a beach with warm tungsten lighting	A photo of a train on a beach, top-down view	A photo of a train on a beach, make it triangular
A watercolor painting of a fish diving on a lake pier, facing left	A watercolor painting of a fish on a lake pier, top-down view	A watercolor painting of a fish with a cyan collar on a lake pier	A watercolor painting of a fish on a lake pier with fluorescent indoor lighting	A watercolor painting of 5 fish on a lake pier
A photo of a guitarist surfing on the moon, close-up	A photo of a guitarist on the moon, close-up	A photo of a guitarist on the moon with bright high-key lighting	A photo of a guitarist in a purple shirt on the moon	A photo of a guitarist doing a yoga pose on the moon
A 3D render of an airplane sailing in a temple courtyard backlit with a subtle rim light	A 3D render of a teal airplane in a temple courtyard	A 3D render of 2 airplanes in a temple courtyard	A 3D render of an airplane in a temple courtyard, moved to the left side	A 3D render of an airplane in a temple courtyard, overhead view
A watercolor painting of a sailboat drifting near a waterfall	A watercolor painting of a sailboat near a waterfall, make it heart-shaped	A watercolor painting of an orange sailboat near a waterfall	A watercolor painting of a sailboat on the moon surface	A watercolor painting of a sailboat with 1 lavender balloons tied to it near a waterfall
An oil painting of a basketball player smiling in a zen garden, wide-angle view	An oil painting of a basketball player in a zen garden, facing forward	An oil painting of a basketball player wearing a maroon hat in a zen garden	An oil painting of a basketball player in a zen garden, moved to the right side	An oil painting of a basketball player in a flower garden
A 3D render of a guitarist reading with a city skyline behind	A 3D render of a guitarist at sunrise in a meadow	A 3D render of a guitarist with a city skyline behind, moved to the right side	A 3D render of a guitarist holding a cyan coffee cup with a city skyline behind	A 3D render of a guitarist with a city skyline behind, wide-angle view
A watercolor painting of a mountain sitting on a sunset beach backlit with a subtle rim light, facing right	A watercolor painting of a mountain painted yellow on a sunset beach	A watercolor painting of a mountain on a sunset beach with moody low-key lighting	A watercolor painting of a mountain at sunrise in a meadow	A watercolor painting of 5 mountains on a sunset beach
A photo of a frog standing in a medieval village	A photo of 5 frogs in a medieval village	A photo of a frog sitting in a medieval village	A photo of a frog on the moon surface	A photo of a frog with purple fur in a medieval village
An illustration of a deer playing in a desert with moody low-key lighting, facing left	An illustration of a deer with blue feathers in a desert	An illustration of a deer in a desert, shifted slightly upward	An illustration of a deer in a desert with tiny fairy lights in the background	An illustration of a deer wearing a lime scarf in a desert
A 3D render of a candle placed on a music stage with fluorescent indoor lighting	A 3D render of a candle on a music stage, make it square-shaped	A 3D render of a candle on a music stage, isometric view	A 3D render of 5 candles on a music stage	A 3D render of a candle with a blue logo on a music stage
An illustration of a lion jumping inside a library, facing right	An illustration of a lion inside a library with moody low-key lighting	An illustration of 5 lions inside a library	An illustration of a lion walking inside a library	An illustration of a lion in a foggy forest
A 3D render of a book sitting on a soccer field	A 3D render of a book on a soccer field backlit with a subtle rim light	A 3D render of a book with a purple logo on a soccer field	A 3D render of a book on a soccer field, make it round	A 3D render of a book on a soccer field, facing left
A 3D render of a windmill standing inside a library under golden-hour lighting, facing forward	A 3D render of a windmill inside a library, isometric view	A 3D render of a windmill at sunrise in a meadow	A 3D render of 3 windmills inside a library	A 3D render of a windmill painted brown inside a library
A photo of a sand dune sitting on the moon, overhead view	A photo of a sand dune in a cozy kitchen	A photo of a sand dune on the moon with fluorescent indoor lighting	A photo of a sand dune with 1 yellow butterflies around on the moon	A photo of a sand dune with magenta flowers on the moon
An oil painting of a windmill standing in a garden with tiny fairy lights in the background, top-down view	An oil painting of 2 windmills in a garden	An oil painting of a windmill in a garden, close-up	An oil painting of a windmill with maroon leaves in a garden	An oil painting of a windmill in a garden, placed in the background
A watercolor painting of a turtle swimming in a mountain meadow with moody low-key lighting	A watercolor painting of a turtle in a mountain meadow, top-down view	A watercolor painting of a turtle wearing a beige bandana in a mountain meadow	A watercolor painting of 5 turtles in a mountain meadow	A watercolor painting of a turtle swimming in a mountain meadow
An illustration of a turtle diving on a sunset beach under soft studio lighting	An illustration of 2 turtles on a sunset beach	An illustration of a turtle on a sunset beach, moved to the right side	An illustration of a turtle diving on a sunset beach	An illustration of a turtle with silver feathers on a sunset beach
A photo of a drone flying on a basketball court	A photo of a drone on a basketball court, placed in the background	A photo of a drone on a basketball court, top-down view	A photo of a drone on a basketball court under neon lighting	A photo of a drone moving on a basketball court
A photo of a subway train landing on a beach, facing right	A photo of a subway train on a beach under neon lighting	A photo of a subway train on a beach, make it heart-shaped	A photo of a subway train on a space station	A photo of a bronze subway train on a beach
A photo of a whale diving in a snowy field, isometric view	A photo of 4 whales in a snowy field	A photo of a whale swimming in a snowy field	A photo of a whale wearing a orange cape in a snowy field	A photo of a whale in a snowy field with tiny fairy lights in the background
An oil painting of a book sitting inside an airport terminal, close-up	An oil painting of a book inside an airport terminal, make it heart-shaped	An oil painting of a book at a carnival	An oil painting of 3 books inside an airport terminal	An oil painting of a book inside an airport terminal, facing right
An illustration of a yoga practitioner painting on the moon under neon lighting	An illustration of a yoga practitioner in a bronze dress on the moon	An illustration of a yoga practitioner on the moon, top-down view	An illustration of a yoga practitioner running on the moon	An illustration of a yoga practitioner on the moon with tiny fairy lights in the background
An oil painting of a soccer ball displayed in a modern office	An oil painting of 2 soccer balls in a modern office	An oil painting of a soccer ball on a rainy street	An oil painting of a soccer ball with a black ribbon in a modern office	An oil painting of a navy soccer ball in a modern office
An illustration of a sailboat sailing in a forest	An illustration of a sailboat in a forest under overcast light	An illustration of 4 sailboats in a forest	An illustration of a navy sailboat in a forest	An illustration of a sailboat at a carnival
An illustration of a tree standing in a snowy field, facing left	An illustration of a tree with 3 silver birds in the branches in a snowy field	An illustration of a tree in a snowy field, top-down view	An illustration of a tree with green leaves in a snowy field	An illustration of a tree on a snowy mountain
An illustration of a skateboarder hiking in a foggy forest under soft studio lighting	An illustration of a skateboarder in a modern office	An illustration of a skateboarder in a brown dress in a foggy forest	An illustration of a skateboarder holding a teal camera in a foggy forest	An illustration of a skateboarder in a foggy forest, isometric view
A watercolor painting of a squirrel sitting in a forest with fluorescent indoor lighting, isometric view	A watercolor painting of a squirrel in a forest with bright high-key lighting	A watercolor painting of a squirrel in a modern office	A watercolor painting of a squirrel in a forest, overhead view	A watercolor painting of a squirrel in a forest, moved to the left side
An oil painting of a sand dune sitting inside a library	An oil painting of a sand dune with 3 purple butterflies around inside a library	An oil painting of a sand dune inside a library with fluorescent indoor lighting	An oil painting of a sand dune with beige flowers inside a library	An oil painting of 3 sand dunes inside a library
A watercolor painting of a basketball player hiking at a carnival	A watercolor painting of a basketball player in a yellow dress at a carnival	A watercolor painting of 4 basketball players at a carnival	A watercolor painting of a basketball player at a carnival, placed in the foreground	A watercolor painting of a basketball player at a carnival, facing right
An illustration of a sand dune sitting in a zen garden under golden-hour lighting, overhead view	An illustration of a sand dune in a zen garden under overcast light	An illustration of a sand dune painted white in a zen garden	An illustration of a sand dune with 2 yellow butterflies around in a zen garden	An illustration of a sand dune in a zen garden
A watercolor painting of a photographer doing a yoga pose in a classroom	A watercolor painting of a photographer in a flower garden	A watercolor painting of a photographer juggling in a classroom	A watercolor painting of a photographer in a classroom under soft studio lighting	A watercolor painting of a photographer in a classroom, top-down view
An oil painting of an umbrella standing in a mountain meadow, isometric view	An oil painting of an umbrella with a beige logo in a mountain meadow	An oil painting of an umbrella in a mountain meadow, moved to the right side	An oil painting of an umbrella in a mountain meadow, make it cylindrical	An oil painting of an umbrella in a mountain meadow under neon lighting
An oil painting of a subway train parked in a forest	An oil painting of a subway train in a forest with tiny fairy lights in the background	An oil painting of a subway train landing in a forest	An oil painting of a subway train with a black roof rack in a forest	An oil painting of 5 subway trains in a forest
An oil painting of a turtle diving in a castle hall under soft studio lighting, in profile	An oil painting of a turtle in a castle hall, placed in the background	An oil painting of a turtle at a carnival	An oil painting of a turtle in a castle hall with fluorescent indoor lighting	An oil painting of a turtle leaping out of the water in a castle hall
A watercolor painting of an elephant jumping in a foggy forest, close-up	A watercolor painting of an elephant wearing a orange scarf in a foggy forest	A watercolor painting of an elephant in a foggy forest under golden-hour lighting	A watercolor painting of an elephant running in a foggy forest	A watercolor painting of an elephant in a foggy forest, in profile
A 3D render of a teapot placed on the moon	A 3D render of a teapot on the moon, shifted slightly upward	A 3D render of a teapot on a beach at sunset	A 3D render of a teapot on the moon, wide-angle view	A 3D render of a teapot with 1 orange stickers on the moon
A 3D render of a helicopter flying on a neon-lit street at night under soft studio lighting	A 3D render of a helicopter on a neon-lit street at night, make it cylindrical	A 3D render of a brown helicopter on a neon-lit street at night	A 3D render of 3 helicopters on a neon-lit street at night	A 3D render of a helicopter on a neon-lit street at night, shifted slightly downward
A watercolor painting of a smartphone displayed in a cozy kitchen with fluorescent indoor lighting, overhead view	A watercolor painting of a smartphone in a cozy kitchen, make it cylindrical	A watercolor painting of 5 smartphones in a cozy kitchen	A watercolor painting of a smartphone in a cozy kitchen, facing left	A watercolor painting of a smartphone in a cozy kitchen with bright high-key lighting
An illustration of a yoga practitioner smiling in a temple courtyard, top-down view	An illustration of 2 yoga practitioners in a temple courtyard	An illustration of a yoga practitioner in a temple courtyard, moved to the left side	An illustration of a yoga practitioner posing in a temple courtyard	An illustration of a yoga practitioner in a temple courtyard with moody low-key lighting
A 3D render of an airplane taking off in a modern office	A 3D render of an airplane in a modern office with bright high-key lighting	A 3D render of 5 airplanes in a modern office	A 3D render of an airplane in a modern office, moved to the left side	A 3D render of an airplane in a modern office, make it square-shaped
A 3D render of a windmill standing on a farm	A 3D render of a windmill on a farm, placed in the background	A 3D render of a windmill on a farm with fluorescent indoor lighting	A 3D render of a windmill with 1 bronze lanterns hanging nearby on a farm	A 3D render of 5 windmills on a farm
A photo of a guitar placed in a sunrise field, facing left	A photo of a guitar in a sunrise field with fluorescent indoor lighting	A photo of a teal guitar in a sunrise field	A photo of a guitar in a sunrise field, in profile	A photo of a guitar in a sunrise field, make it square-shaped
A watercolor painting of a bicycle flying on a soccer field	A watercolor painting of a bicycle flying on a soccer field	A watercolor painting of a bicycle with a bronze decal on a soccer field	A watercolor painting of a bicycle on a soccer field, shifted slightly upward	A watercolor painting of a bicycle on a soccer field with tiny fairy lights in the background
An oil painting of a dog sitting in a sci-fi corridor under overcast light	An oil painting of a dog in a sci-fi corridor with tiny fairy lights in the background	An oil painting of a dog in a sci-fi corridor, facing forward	An oil painting of a dog at a carnival	An oil painting of a dog sleeping in a sci-fi corridor
A 3D render of an eagle spreading wings by a riverbank, isometric view	A 3D render of an eagle by a riverbank, wide-angle view	A 3D render of an eagle with green fur by a riverbank	A 3D render of an eagle by a riverbank, shifted slightly downward	A 3D render of an eagle with a bronze collar by a riverbank
An oil painting of a waterfall sitting on a farm	An oil painting of a waterfall on a farm with tiny fairy lights in the background	An oil painting of a waterfall on a farm, close-up	An oil painting of 4 waterfalls on a farm	An oil painting of a waterfall with lavender flowers on a farm
An oil painting of a candle displayed in a zen garden	An oil painting of a candle in a zen garden, shifted slightly downward	An oil painting of a candle in a zen garden, make it cylindrical	An oil painting of a candle with 3 red stickers in a zen garden	An oil painting of a candle in a zen garden, top-down view
An illustration of a runner standing on a sunset beach with warm tungsten lighting, overhead view	An illustration of 5 runners on a sunset beach	An illustration of a runner on a sunset beach, shifted slightly upward	An illustration of a runner in a desert with dunes	An illustration of a runner skating on a sunset beach
An oil painting of a motorcycle taking off inside a cave	An oil painting of a motorcycle inside a cave, close-up	An oil painting of a motorcycle in a cozy kitchen	An oil painting of a motorcycle inside a cave with fluorescent indoor lighting	An oil painting of a motorcycle inside a cave, shifted slightly upward
A photo of a train drifting at an open-air market, top-down view	A photo of a train at an open-air market under neon lighting	A photo of a train drifting at an open-air market	A photo of a train in a neon-lit city at night	A photo of a train with a black racing stripe at an open-air market
An illustration of a waterfall sitting on a music stage, facing right	An illustration of a waterfall on a music stage, shifted slightly upward	An illustration of a waterfall on a music stage, isometric view	An illustration of a waterfall with 1 brown lanterns hanging nearby on a music stage	An illustration of a waterfall with pink flowers on a music stage
An illustration of a bear standing in a foggy forest	An illustration of a bear in a foggy forest backlit with a subtle rim light	An illustration of a bear in a foggy forest, in profile	An illustration of a bear walking in a foggy forest	An illustration of a bear with silver shell in a foggy forest
An oil painting of a table standing in a temple courtyard under soft studio lighting, facing forward	An oil painting of 2 tables in a temple courtyard	An oil painting of a blue table in a temple courtyard	An oil painting of a table at a carnival	An oil painting of a table in a temple courtyard, make it triangular
A photo of a dolphin diving on a lake pier under golden-hour lighting, facing forward	A photo of 3 dolphins on a lake pier	A photo of a dolphin on a lake pier, shifted slightly downward	A photo of a dolphin in a neon-lit city at night	A photo of a dolphin with black feathers on a lake pier
A photo of a surfer hiking at an amusement park, facing right	A photo of a surfer in a foggy forest	A photo of a surfer juggling at an amusement park	A photo of a surfer in a magenta hat at an amusement park	A photo of a surfer at an amusement park, facing forward
A watercolor painting of an astronaut running in a sci-fi corridor, top-down view	A watercolor painting of an astronaut in a sci-fi corridor, centered	A watercolor painting of an astronaut on a rainy street	A watercolor painting of an astronaut in a sci-fi corridor under overcast light	A watercolor painting of an astronaut in a sci-fi corridor, wide-angle view
A 3D render of a painter doing a yoga pose in a zen garden under neon lighting, top-down view	A 3D render of a painter holding a brown skateboard in a zen garden	A 3D render of a painter in a silver dress in a zen garden	A 3D render of a painter doing a yoga pose in a zen garden	A 3D render of a painter in a zen garden, shifted slightly downward
An illustration of a castle sitting on a basketball court	An illustration of a castle on a basketball court, facing left	An illustration of a castle with 2 teal lanterns hanging nearby on a basketball court	An illustration of a castle with silver flowers on a basketball court	An illustration of a castle on a basketball court under soft studio lighting
An oil painting of a vase displayed on the moon with fluorescent indoor lighting	An oil painting of a vase with 3 magenta stickers on the moon	An oil painting of a vase on the moon, make it triangular	An oil painting of a vase on the moon, in profile	An oil painting of a vase by a waterfall
An illustration of a squirrel lying down on a sunset beach, facing left	An illustration of a squirrel on the moon surface	An illustration of a squirrel with white scales on a sunset beach	An illustration of a squirrel on a sunset beach with fluorescent indoor lighting	An illustration of 2 squirrels on a sunset beach
An illustration of a basketball player dancing in a zen garden	An illustration of a basketball player holding a maroon umbrella in a zen garden	An illustration of a basketball player in a zen garden, shifted slightly downward	An illustration of 5 basketball players in a zen garden	An illustration of a basketball player in a zen garden with tiny fairy lights in the background
A photo of a runner playing guitar on a rocky Mars landscape, overhead view	A photo of a runner holding a purple skateboard on a rocky Mars landscape	A photo of a runner inside a library	A photo of a runner on a rocky Mars landscape, moved to the right side	A photo of a runner on a rocky Mars landscape under overcast light
An oil painting of a painting placed on a lake pier with moody low-key lighting	An oil painting of a teal painting on a lake pier	An oil painting of 4 paintings on a lake pier	An oil painting of a painting on a lake pier, close-up	An oil painting of a painting on a lake pier backlit with a subtle rim light
A 3D render of a cat sleeping inside a library with tiny fairy lights in the background	A 3D render of a cat sitting inside a library	A 3D render of 2 cats inside a library	A 3D render of a cat inside a library, facing forward	A 3D render of a cat inside a library under overcast light
An illustration of a photographer doing a yoga pose in a castle hall	An illustration of a photographer at sunrise in a meadow	An illustration of a photographer sitting in a castle hall	An illustration of a photographer in a castle hall, centered	An illustration of a photographer in a castle hall, overhead view
A watercolor painting of a sailboat racing in a garden	A watercolor painting of 2 sailboats in a garden	A watercolor painting of a sailboat with a silver roof rack in a garden	A watercolor painting of a sailboat in a garden, facing forward	A watercolor painting of a sailboat in a garden under neon lighting
An illustration of an owl gliding on a farm, facing forward	An illustration of 3 owls on a farm	An illustration of an owl on a farm, facing forward	An illustration of an owl with navy shell on a farm	An illustration of an owl at sunrise in a meadow
A photo of a soccer ball displayed with a city skyline behind	A photo of a soccer ball with a city skyline behind with warm tungsten lighting	A photo of a soccer ball with a city skyline behind, isometric view	A photo of a teal soccer ball with a city skyline behind	A photo of a soccer ball with a city skyline behind, shifted slightly upward
An illustration of an airplane drifting inside a library	An illustration of an airplane inside a library, make it triangular	An illustration of an airplane inside a library with moody low-key lighting	An illustration of an airplane inside a library, moved to the left side	An illustration of an airplane inside a library, top-down view
A watercolor painting of a camera resting in a forest	A watercolor painting of a camera in a forest under golden-hour lighting	A watercolor painting of a camera on a lake pier	A watercolor painting of a brown camera in a forest	A watercolor painting of a camera with a gold logo in a forest
An oil painting of a dancer smiling under a thunderstorm sky	An oil painting of a dancer holding a cyan balloon under a thunderstorm sky	An oil painting of a dancer under a thunderstorm sky with fluorescent indoor lighting	An oil painting of a dancer under a thunderstorm sky, close-up	An oil painting of 4 dancers under a thunderstorm sky
An oil painting of a motorcycle parked on a soccer field under golden-hour lighting	An oil painting of a motorcycle with a purple decal on a soccer field	An oil painting of a motorcycle on a soccer field, moved to the right side	An oil painting of a motorcycle by a waterfall	An oil painting of a motorcycle on a soccer field, make it cylindrical
An illustration of a pagoda standing in a sunrise field with moody low-key lighting	An illustration of a pagoda in a sunrise field under overcast light	An illustration of a pagoda in a sunrise field, centered	An illustration of a pagoda with pink leaves in a sunrise field	An illustration of a pagoda at a carnival
A watercolor painting of an owl perched in a zen garden backlit with a subtle rim light, isometric view	A watercolor painting of an owl with red feathers in a zen garden	A watercolor painting of 3 owls in a zen garden	A watercolor painting of an owl wearing a gold cape in a zen garden	A watercolor painting of an owl on a lake pier
An illustration of a bus landing in a garden, isometric view	An illustration of a bus in a garden, shifted slightly upward	An illustration of 4 buses in a garden	An illustration of a bus in a garden under neon lighting	An illustration of a bus with 3 red balloons tied to it in a garden
A photo of a lighthouse standing underwater near a coral reef	A photo of a lighthouse underwater near a coral reef with bright high-key lighting	A photo of a lighthouse underwater near a coral reef, facing forward	A photo of a lighthouse with 1 brown birds in the branches underwater near a coral reef	A photo of a lighthouse on a rainy street
A photo of a pagoda standing inside an airport terminal	A photo of a pagoda inside an airport terminal with moody low-key lighting	A photo of a pagoda inside an airport terminal, isometric view	A photo of a pagoda painted silver inside an airport terminal	A photo of 3 pagodas inside an airport terminal
An illustration of a chef skating in a classroom backlit with a subtle rim light	An illustration of a chef in a classroom with bright high-key lighting	An illustration of a chef holding a beige camera in a classroom	An illustration of 3 cheves in a classroom	An illustration of a chef in a classroom, shifted slightly upward
A watercolor painting of a cat jumping inside a library	A watercolor painting of a cat on a lake pier	A watercolor painting of a cat inside a library, facing right	A watercolor painting of a cat sleeping inside a library	A watercolor painting of a cat inside a library, centered
An oil painting of an airplane flying at an open-air market	An oil painting of 4 airplanes at an open-air market	An oil painting of a black airplane at an open-air market	An oil painting of an airplane at an open-air market, placed in the background	An oil painting of an airplane landing at an open-air market
A 3D render of a sand dune sitting in a garden	A 3D render of a sand dune in a garden, placed in the foreground	A 3D render of a sand dune with 2 gold birds in the branches in a garden	A 3D render of a sand dune painted silver in a garden	A 3D render of a sand dune in a garden, close-up
An oil painting of a castle sitting at an amusement park, facing right	An oil painting of a castle at an amusement park, moved to the right side	An oil painting of a castle with white flowers at an amusement park	An oil painting of a castle on a lake pier	An oil painting of a castle at an amusement park, overhead view
A photo of a cyclist smiling in a forest, isometric view	A photo of a cyclist in a forest, shifted slightly downward	A photo of a cyclist holding a orange book in a forest	A photo of a cyclist by a waterfall	A photo of a cyclist in a forest with tiny fairy lights in the background
An illustration of a bicycle flying in a desert, wide-angle view	An illustration of a bicycle in a neon-lit city at night	An illustration of 5 bicycles in a desert	An illustration of a bicycle in a desert with moody low-key lighting	An illustration of a magenta bicycle in a desert
An oil painting of a lion sleeping in a city street, top-down view	An oil painting of a lion with bronze fur in a city street	An oil painting of 4 lions in a city street	An oil painting of a lion in a city street with fluorescent indoor lighting	An oil painting of a lion in a cozy kitchen
An oil painting of a sneakers standing in outer space	An oil painting of a sneakers in outer space, make it cylindrical	An oil painting of a sneakers in a foggy forest	An oil painting of a navy sneakers in outer space	An oil painting of a sneakers with 1 beige stickers in outer space
A photo of an eagle perched in a temple courtyard	A photo of an eagle in a temple courtyard, centered	A photo of an eagle in a temple courtyard, facing left	A photo of an eagle with beige fur in a temple courtyard	A photo of 2 eagles in a temple courtyard
An illustration of a penguin perched in a zen garden backlit with a subtle rim light, close-up	An illustration of a penguin in a zen garden, in profile	An illustration of a penguin in a zen garden under golden-hour lighting	An illustration of a penguin with red scales in a zen garden	An illustration of 2 penguins in a zen garden
An illustration of a hat placed inside a library with fluorescent indoor lighting	An illustration of a hat inside a library, centered	An illustration of a hat inside a library, facing forward	An illustration of 3 hats inside a library	An illustration of a purple hat inside a library
A photo of a bicycle sailing on a beach, in profile	A photo of a bicycle on a beach, moved to the right side	A photo of a bicycle parked on a beach	A photo of a white bicycle on a beach	A photo of a bicycle with 2 orange balloons tied to it on a beach
An oil painting of an eagle perched with a city skyline behind with moody low-key lighting, wide-angle view	An oil painting of an eagle with a city skyline behind with bright high-key lighting	An oil painting of an eagle wearing yellow glasses with a city skyline behind	An oil painting of an eagle with red scales with a city skyline behind	An oil painting of an eagle with a city skyline behind, placed in the foreground
An illustration of a fish diving by a riverbank, in profile	An illustration of a fish with a lime collar by a riverbank	An illustration of a fish by a riverbank with bright high-key lighting	An illustration of a fish diving by a riverbank	An illustration of a fish by a riverbank, centered
A photo of a bus taking off at an amusement park	A photo of a teal bus at an amusement park	A photo of a bus on the moon surface	A photo of a bus at an amusement park, make it heart-shaped	A photo of a bus with 1 magenta stickers on the door at an amusement park
A watercolor painting of a lizard walking in a garden, in profile	A watercolor painting of a lizard in a foggy forest	A watercolor painting of a lizard in a garden, close-up	A watercolor painting of a lizard with a cyan collar in a garden	A watercolor painting of 4 lizards in a garden
A 3D render of a tiger lying down in a desert	A 3D render of a tiger in a desert, moved to the right side	A 3D render of a tiger with yellow fur in a desert	A 3D render of 3 tigers in a desert	A 3D render of a tiger in a desert with tiny fairy lights in the background
An illustration of a parrot gliding in a zen garden	An illustration of a parrot in a zen garden, moved to the left side	An illustration of a parrot on a rainy street	An illustration of a parrot with a black collar in a zen garden	An illustration of a parrot in a zen garden with moody low-key lighting
A 3D render of an elephant jumping in a sunrise field, wide-angle view	A 3D render of an elephant on a rainy street	A 3D render of an elephant walking in a sunrise field	A 3D render of an elephant wearing a green bandana in a sunrise field	A 3D render of an elephant in a sunrise field, top-down view
An illustration of a motorcycle taking off with a city skyline behind, close-up	An illustration of 4 motorcycles with a city skyline behind	An illustration of a motorcycle with a city skyline behind, overhead view	An illustration of a motorcycle with a city skyline behind, make it round	An illustration of a motorcycle underwater near coral
A 3D render of a bridge sitting in a garden, overhead view	A 3D render of a bridge with 2 magenta birds in the branches in a garden	A 3D render of a bridge in a garden, facing forward	A 3D render of a bridge in a garden, moved to the left side	A 3D render of 4 bridges in a garden
An oil painting of a painter painting at a carnival with tiny fairy lights in the background, facing left	An oil painting of a painter at a carnival, shifted slightly downward	An oil painting of a painter painting at a carnival	An oil painting of 3 painters at a carnival	An oil painting of a painter at a carnival, in profile
A 3D render of a frog sitting in a mountain meadow with bright high-key lighting, facing forward	A 3D render of 4 frogs in a mountain meadow	A 3D render of a frog at sunrise in a meadow	A 3D render of a frog in a mountain meadow, wide-angle view	A 3D render of a frog with a green collar in a mountain meadow
An oil painting of a squirrel sleeping in a modern office under soft studio lighting	An oil painting of a squirrel in a modern office, placed in the background	An oil painting of a squirrel in a modern office with fluorescent indoor lighting	An oil painting of 2 squirrels in a modern office	An oil painting of a squirrel in a modern office, isometric view
A 3D render of a drone landing on a rooftop under soft studio lighting	A 3D render of a drone on a rooftop, facing left	A 3D render of a drone on a rooftop with warm tungsten lighting	A 3D render of a drone on a rooftop, moved to the right side	A 3D render of a drone on a rooftop, make it cylindrical
An illustration of a tree standing in a sci-fi corridor under soft studio lighting	An illustration of a tree in a sci-fi corridor, wide-angle view	An illustration of a tree with navy leaves in a sci-fi corridor	An illustration of a tree in a sci-fi corridor with moody low-key lighting	An illustration of a tree on a lake pier
A 3D render of a surfer taking a photo in a sunrise field, close-up	A 3D render of a surfer in a sunrise field, moved to the left side	A 3D render of a surfer carrying a magenta backpack in a sunrise field	A 3D render of a surfer in a sunrise field, facing forward	A 3D render of a surfer underwater near coral
An oil painting of a waterfall sitting in outer space backlit with a subtle rim light, overhead view	An oil painting of a waterfall in outer space with bright high-key lighting	An oil painting of a waterfall with purple leaves in outer space	An oil painting of a waterfall in outer space, shifted slightly downward	An oil painting of 4 waterfalls in outer space
An oil painting of a sailboat landing on a sunset beach	An oil painting of a sailboat on a sunset beach, make it round	An oil painting of a sailboat sailing on a sunset beach	An oil painting of a sailboat with a teal decal on a sunset beach	An oil painting of a sailboat in a cozy kitchen
A 3D render of a cake standing at a carnival, facing forward	A 3D render of a cake at a carnival under overcast light	A 3D render of a brown cake at a carnival	A 3D render of a cake on the moon surface	A 3D render of a cake with a cyan logo at a carnival
An oil painting of a mountain sitting by a riverbank under neon lighting	An oil painting of a mountain with cyan flowers by a riverbank	An oil painting of a mountain with 2 yellow birds in the branches by a riverbank	An oil painting of 4 mountains by a riverbank	An oil painting of a mountain by a riverbank with tiny fairy lights in the background
An illustration of a bicycle racing on a soccer field	An illustration of a bicycle on a soccer field under overcast light	An illustration of a bicycle flying on a soccer field	An illustration of 4 bicycles on a soccer field	An illustration of a purple bicycle on a soccer field
A 3D render of a pizza resting in a mountain meadow, close-up	A 3D render of a pizza in a cozy kitchen	A 3D render of a pizza in a mountain meadow with fluorescent indoor lighting	A 3D render of a pizza in a mountain meadow, facing forward	A 3D render of a pizza in a mountain meadow, placed in the foreground
A photo of a lamp resting inside an airport terminal	A photo of a lamp inside an airport terminal, make it cylindrical	A photo of a silver lamp inside an airport terminal	A photo of a lamp inside an airport terminal under soft studio lighting	A photo of a lamp with a red logo inside an airport terminal
An illustration of an owl spreading wings inside an airport terminal, facing right	An illustration of an owl inside an airport terminal with moody low-key lighting	An illustration of an owl inside a library	An illustration of an owl with yellow shell inside an airport terminal	An illustration of 3 owls inside an airport terminal
A watercolor painting of a pagoda standing near a waterfall under neon lighting, in profile	A watercolor painting of a pagoda near a waterfall, isometric view	A watercolor painting of a pagoda near a waterfall, placed in the foreground	A watercolor painting of a pagoda with magenta leaves near a waterfall	A watercolor painting of a pagoda with 2 brown butterflies around near a waterfall
A 3D render of a book standing underwater near a coral reef with warm tungsten lighting, close-up	A 3D render of a book with 4 lavender stickers underwater near a coral reef	A 3D render of 4 books underwater near a coral reef	A 3D render of a book underwater near a coral reef backlit with a subtle rim light	A 3D render of a book on the moon surface
An oil painting of a lamp sitting in a snowy field, facing right	An oil painting of a lamp in a snowy field with fluorescent indoor lighting	An oil painting of a lavender lamp in a snowy field	An oil painting of a lamp with a teal ribbon in a snowy field	An oil painting of a lamp in a neon-lit city at night
An illustration of a bridge sitting in a zen garden	An illustration of a bridge in a zen garden, moved to the left side	An illustration of a bridge with 3 green lanterns hanging nearby in a zen garden	An illustration of a bridge in a zen garden under overcast light	An illustration of a bridge in a zen garden
A photo of a pagoda standing in a temple courtyard with fluorescent indoor lighting	A photo of a pagoda in a flower garden	A photo of a pagoda with bronze flowers in a temple courtyard	A photo of a pagoda in a temple courtyard, moved to the left side	A photo of a pagoda with 4 teal birds in the branches in a temple courtyard
An illustration of a lighthouse standing in a snowy field under neon lighting	An illustration of a lighthouse on a beach at sunset	An illustration of a lighthouse with lavender flowers in a snowy field	An illustration of a lighthouse in a snowy field under overcast light	An illustration of a lighthouse in a snowy field, top-down view
A photo of a surfer standing at an open-air market	A photo of a surfer at an open-air market under soft studio lighting	A photo of a surfer at an open-air market, centered	A photo of a surfer in a navy jacket at an open-air market	A photo of a surfer on a snowy mountain
A 3D render of a lion sitting inside a library with bright high-key lighting	A 3D render of a lion with cyan feathers inside a library	A 3D render of a lion sleeping inside a library	A 3D render of a lion with a brown collar inside a library	A 3D render of a lion inside a library, shifted slightly downward
A watercolor painting of a guitarist painting inside an airport terminal with bright high-key lighting, isometric view	A watercolor painting of 2 guitarists inside an airport terminal	A watercolor painting of a guitarist inside an airport terminal under golden-hour lighting	A watercolor painting of a guitarist inside an airport terminal, moved to the left side	A watercolor painting of a guitarist wearing magenta glasses inside an airport terminal
A 3D render of a table displayed in a medieval village with fluorescent indoor lighting, in profile	A 3D render of a green table in a medieval village	A 3D render of 2 tables in a medieval village	A 3D render of a table in a medieval village, moved to the left side	A 3D render of a table in a medieval village, facing right
An illustration of a chef painting at an amusement park	An illustration of a chef in a maroon scarf at an amusement park	An illustration of a chef jumping at an amusement park	An illustration of a chef holding a red microphone at an amusement park	An illustration of a chef at an amusement park, moved to the right side
An oil painting of a dancer running on a music stage with tiny fairy lights in the background	An oil painting of a dancer on a snowy mountain	An oil painting of a dancer in a black shirt on a music stage	An oil painting of a dancer wearing a cyan jacket on a music stage	An oil painting of 2 dancers on a music stage
A photo of an astronaut surfing inside a library	A photo of an astronaut inside a library, placed in the foreground	A photo of an astronaut inside a library under neon lighting	A photo of 4 astronauts inside a library	A photo of an astronaut in a foggy forest
A watercolor painting of a butterfly standing in a zen garden, close-up	A watercolor painting of a butterfly at sunrise in a meadow	A watercolor painting of a butterfly in a zen garden, top-down view	A watercolor painting of a butterfly with a black collar in a zen garden	A watercolor painting of a butterfly in a zen garden under golden-hour lighting
A watercolor painting of a painting resting on a soccer field	A watercolor painting of a painting in a zen garden	A watercolor painting of a painting with a gold logo on a soccer field	A watercolor painting of 4 paintings on a soccer field	A watercolor painting of a painting on a soccer field under golden-hour lighting
A watercolor painting of an airplane sailing on a rooftop, facing forward	A watercolor painting of an airplane in a desert with dunes	A watercolor painting of an airplane with a maroon racing stripe on a rooftop	A watercolor painting of an airplane on a rooftop, make it cylindrical	A watercolor painting of an airplane drifting on a rooftop
An oil painting of a waterfall sitting inside a library, overhead view	An oil painting of a waterfall with a orange rainbow in the sky inside a library	An oil painting of 2 waterfalls inside a library	An oil painting of a waterfall inside a library, moved to the right side	An oil painting of a waterfall inside a library with warm tungsten lighting
A watercolor painting of a table displayed inside an airport terminal, wide-angle view	A watercolor painting of a table underwater near coral	A watercolor painting of a table inside an airport terminal with warm tungsten lighting	A watercolor painting of a table inside an airport terminal, facing right	A watercolor painting of a silver table inside an airport terminal
An oil painting of a guitarist playing guitar at an amusement park	An oil painting of a guitarist at an amusement park under golden-hour lighting	An oil painting of a guitarist at an amusement park, shifted slightly downward	An oil painting of a guitarist at an amusement park, top-down view	An oil painting of a guitarist waving at an amusement park
An oil painting of a flower bush sitting in a medieval village, facing forward	An oil painting of a flower bush in a medieval village, close-up	An oil painting of a flower bush in a medieval village, placed in the background	An oil painting of a flower bush on a space station	An oil painting of a flower bush with navy flowers in a medieval village
A photo of a sand dune sitting in a cozy kitchen	A photo of a sand dune with 3 maroon birds in the branches in a cozy kitchen	A photo of a sand dune in a cozy kitchen, placed in the foreground	A photo of a sand dune in a cozy kitchen, facing right	A photo of a sand dune with red leaves in a cozy kitchen
An illustration of a basketball player jumping at an open-air market, top-down view	An illustration of a basketball player at an open-air market, placed in the background	An illustration of a basketball player at an open-air market, facing left	An illustration of 4 basketball players at an open-air market	An illustration of a basketball player in a cozy kitchen
A photo of a watch standing at a skate park	A photo of 2 watches at a skate park	A photo of a watch with a yellow ribbon at a skate park	A photo of a watch at a skate park, wide-angle view	A photo of a watch on a snowy mountain
A watercolor painting of a soccer player painting at a cafe, wide-angle view	A watercolor painting of a soccer player in a teal shirt at a cafe	A watercolor painting of a soccer player underwater near coral	A watercolor painting of a soccer player holding a beige umbrella at a cafe	A watercolor painting of a soccer player at a cafe under overcast light
A 3D render of a fox sleeping in a castle hall with moody low-key lighting, isometric view	A 3D render of a fox sitting in a castle hall	A 3D render of a fox in a castle hall, moved to the left side	A 3D render of a fox wearing a maroon scarf in a castle hall	A 3D render of a fox in a castle hall with moody low-key lighting
A 3D render of a chair resting inside an airport terminal, wide-angle view	A 3D render of 3 chairs inside an airport terminal	A 3D render of a chair inside an airport terminal with warm tungsten lighting	A 3D render of a chair with a brown logo inside an airport terminal	A 3D render of a chair inside an airport terminal, close-up
An oil painting of a surfer standing in a cozy kitchen under neon lighting	An oil painting of a surfer jumping in a cozy kitchen	An oil painting of a surfer in a cozy kitchen, placed in the background	An oil painting of 3 surfers in a cozy kitchen	An oil painting of a surfer in a cozy kitchen, close-up
A photo of a painting sitting in a zen garden, top-down view	A photo of a painting in a zen garden, make it round	A photo of a painting in a zen garden, top-down view	A photo of a pink painting in a zen garden	A photo of a painting in a flower garden
An illustration of a skateboard resting in a garden, facing right	An illustration of 3 skateboards in a garden	An illustration of a skateboard in a garden with moody low-key lighting	An illustration of a skateboard with a pink ribbon in a garden	An illustration of a skateboard underwater near coral
A photo of a runner surfing inside a cave under soft studio lighting, facing forward	A photo of a runner in a yellow jacket inside a cave	A photo of a runner holding a green camera inside a cave	A photo of a runner inside a cave, in profile	A photo of a runner inside a cave with moody low-key lighting
An illustration of an airplane moving inside a cave	An illustration of an airplane inside a cave, facing right	An illustration of an airplane inside a cave, placed in the foreground	An illustration of an airplane with a red decal inside a cave	An illustration of 4 airplanes inside a cave
A photo of an umbrella standing on a soccer field under overcast light	A photo of an umbrella with a purple logo on a soccer field	A photo of an umbrella on a rainy street	A photo of a black umbrella on a soccer field	A photo of an umbrella on a soccer field, isometric view
An oil painting of a tree standing in a city street	An oil painting of a tree with a pink rainbow in the sky in a city street	An oil painting of a tree painted cyan in a city street	An oil painting of a tree in a city street, moved to the left side	An oil painting of 5 trees in a city street
An oil painting of a clock sitting in a cyberpunk alley	An oil painting of 4 clocks in a cyberpunk alley	An oil painting of a clock in a cyberpunk alley, placed in the foreground	An oil painting of a clock in a cyberpunk alley with fluorescent indoor lighting	An oil painting of a clock with a silver ribbon in a cyberpunk alley
An illustration of a mountain sitting in a classroom, in profile	An illustration of a mountain in a classroom, overhead view	An illustration of a mountain with 3 lime birds in the branches in a classroom	An illustration of a mountain in a classroom, placed in the foreground	An illustration of a mountain in a classroom with moody low-key lighting
A 3D render of a dolphin diving near a waterfall	A 3D render of a dolphin near a waterfall backlit with a subtle rim light	A 3D render of 2 dolphins near a waterfall	A 3D render of a dolphin near a waterfall, facing left	A 3D render of a dolphin with beige shell near a waterfall
A 3D render of an airplane moving in a foggy forest with fluorescent indoor lighting	A 3D render of an airplane sailing in a foggy forest	A 3D render of an airplane in a foggy forest with warm tungsten lighting	A 3D render of an airplane in a foggy forest, placed in the foreground	A 3D render of an airplane with a pink roof rack in a foggy forest
An illustration of a lion walking in a forest with bright high-key lighting	An illustration of 4 lions in a forest	An illustration of a lion lying down in a forest	An illustration of a lion in a forest, close-up	An illustration of a lion in a forest under golden-hour lighting
A photo of a squirrel lying down in a cyberpunk alley with fluorescent indoor lighting, facing right	A photo of 2 squirrels in a cyberpunk alley	A photo of a squirrel walking in a cyberpunk alley	A photo of a squirrel in a cyberpunk alley, facing left	A photo of a squirrel with a orange collar in a cyberpunk alley
An oil painting of a chair standing at a carnival under neon lighting, facing forward	An oil painting of a gold chair at a carnival	An oil painting of 4 chairs at a carnival	An oil painting of a chair at a carnival under soft studio lighting	An oil painting of a chair at a carnival, make it triangular
An oil painting of a photographer jumping in a sci-fi corridor under neon lighting, top-down view	An oil painting of a photographer in a sci-fi corridor, moved to the right side	An oil painting of a photographer running in a sci-fi corridor	An oil painting of a photographer on the moon surface	An oil painting of a photographer in a lavender jacket in a sci-fi corridor
A 3D render of a lizard walking inside a cave, in profile	A 3D render of a lizard sleeping inside a cave	A 3D render of a lizard inside a cave, moved to the left side	A 3D render of a lizard wearing a black scarf inside a cave	A 3D render of a lizard inside a cave with tiny fairy lights in the background
An illustration of a cyclist posing in a zen garden with moody low-key lighting, top-down view	An illustration of a cyclist on the moon surface	An illustration of a cyclist in a zen garden, shifted slightly downward	An illustration of a cyclist typing in a zen garden	An illustration of a cyclist in a silver scarf in a zen garden
A 3D render of a soccer player taking a photo in a sci-fi corridor with fluorescent indoor lighting, wide-angle view	A 3D render of a soccer player in a sci-fi corridor with bright high-key lighting	A 3D render of a soccer player inside a library	A 3D render of 5 soccer players in a sci-fi corridor	A 3D render of a soccer player in a sci-fi corridor, placed in the background
A watercolor painting of a sailboat racing on the moon, overhead view	A watercolor painting of a sailboat on the moon, moved to the right side	A watercolor painting of a sailboat on the moon with tiny fairy lights in the background	A watercolor painting of a cyan sailboat on the moon	A watercolor painting of 3 sailboats on the moon
A 3D render of a yoga practitioner reading on a lake pier	A 3D render of a yoga practitioner wearing a green jacket on a lake pier	A 3D render of 5 yoga practitioners on a lake pier	A 3D render of a yoga practitioner in a green jacket on a lake pier	A 3D render of a yoga practitioner typing on a lake pier
An oil painting of a mug displayed in a sunrise field, wide-angle view	An oil painting of a mug in a sunrise field, make it square-shaped	An oil painting of a navy mug in a sunrise field	An oil painting of a mug in a sunrise field with tiny fairy lights in the background	An oil painting of a mug in a sunrise field, centered
A photo of a vase placed at a carnival under overcast light, wide-angle view	A photo of a vase at a carnival, wide-angle view	A photo of a vase at a carnival with moody low-key lighting	A photo of a vase underwater near coral	A photo of a vase at a carnival, make it square-shaped
An illustration of a lizard sleeping on a music stage under overcast light	An illustration of a lizard on a music stage, moved to the right side	An illustration of a lizard running on a music stage	An illustration of a lizard on a music stage, facing left	An illustration of a lizard underwater near coral
A watercolor painting of a windmill standing on a beach, facing left	A watercolor painting of a windmill on a beach at sunset	A watercolor painting of a windmill with lime flowers on a beach	A watercolor painting of a windmill on a beach, isometric view	A watercolor painting of a windmill on a beach under soft studio lighting
A watercolor painting of a bridge sitting in a temple courtyard	A watercolor painting of 3 bridges in a temple courtyard	A watercolor painting of a bridge in a temple courtyard with moody low-key lighting	A watercolor painting of a bridge in a temple courtyard, shifted slightly downward	A watercolor painting of a bridge with gold leaves in a temple courtyard
A photo of a lighthouse standing inside an airport terminal under golden-hour lighting, close-up	A photo of a lighthouse inside an airport terminal, facing forward	A photo of a lighthouse inside an airport terminal with moody low-key lighting	A photo of a lighthouse with 2 pink birds in the branches inside an airport terminal	A photo of a lighthouse with orange flowers inside an airport terminal
A watercolor painting of a parrot perched on a rocky Mars landscape with tiny fairy lights in the background	A watercolor painting of 4 parrots on a rocky Mars landscape	A watercolor painting of a parrot perched on a rocky Mars landscape	A watercolor painting of a parrot on a rocky Mars landscape with moody low-key lighting	A watercolor painting of a parrot on a space station
A watercolor painting of a hiker running on a beach	A watercolor painting of a hiker on a beach, shifted slightly upward	A watercolor painting of a hiker in a bronze hat on a beach	A watercolor painting of a hiker on a beach under overcast light	A watercolor painting of a hiker holding a lime balloon on a beach
A 3D render of a sushi platter sitting on a soccer field	A 3D render of a sushi platter with a green ribbon on a soccer field	A 3D render of a teal sushi platter on a soccer field	A 3D render of a sushi platter on a soccer field, top-down view	A 3D render of a sushi platter in a neon-lit city at night
A watercolor painting of an astronaut doing a yoga pose in a foggy forest under soft studio lighting	A watercolor painting of an astronaut in a foggy forest with tiny fairy lights in the background	A watercolor painting of an astronaut in a foggy forest, overhead view	A watercolor painting of an astronaut in a purple jacket in a foggy forest	A watercolor painting of 5 astronauts in a foggy forest
A watercolor painting of a hat resting on a rocky Mars landscape with warm tungsten lighting	A watercolor painting of a hat on the moon surface	A watercolor painting of a hat on a rocky Mars landscape, facing forward	A watercolor painting of a hat on a rocky Mars landscape, moved to the left side	A watercolor painting of a hat on a rocky Mars landscape, make it triangular
An illustration of a castle sitting in a snowy field under neon lighting	An illustration of a castle with 2 navy birds in the branches in a snowy field	An illustration of a castle by a waterfall	An illustration of a castle in a snowy field, facing right	An illustration of a castle in a snowy field, moved to the left side
An oil painting of a butterfly jumping in outer space with moody low-key lighting	An oil painting of a butterfly with green feathers in outer space	An oil painting of 3 butterflies in outer space	An oil painting of a butterfly at sunrise in a meadow	An oil painting of a butterfly in outer space, shifted slightly downward
A watercolor painting of a coffee cup sitting on a lake pier	A watercolor painting of a coffee cup on a lake pier, make it cylindrical	A watercolor painting of a coffee cup on a lake pier, close-up	A watercolor painting of a gold coffee cup on a lake pier	A watercolor painting of a coffee cup on a lake pier backlit with a subtle rim light
A watercolor painting of a helicopter drifting in a classroom	A watercolor painting of 2 helicopters in a classroom	A watercolor painting of a green helicopter in a classroom	A watercolor painting of a helicopter in a classroom, make it round	A watercolor painting of a helicopter racing in a classroom
An illustration of a book sitting on a neon-lit street at night	An illustration of a book on a lake pier	An illustration of a book on a neon-lit street at night, make it square-shaped	An illustration of a book on a neon-lit street at night, close-up	An illustration of a book on a neon-lit street at night, shifted slightly upward
An oil painting of a motorcycle parked on a farm	An oil painting of a motorcycle on a farm, moved to the right side	An oil painting of a motorcycle parked on a farm	An oil painting of a cyan motorcycle on a farm	An oil painting of a motorcycle in a flower garden
A photo of a fox standing in a zen garden	A photo of 5 foxes in a zen garden	A photo of a fox with teal shell in a zen garden	A photo of a fox in a zen garden, overhead view	A photo of a fox in a zen garden, shifted slightly upward
A watercolor painting of a mug placed in a snowy field, facing forward	A watercolor painting of a mug underwater near coral	A watercolor painting of a mug with a lavender logo in a snowy field	A watercolor painting of a mug in a snowy field, make it cylindrical	A watercolor painting of 2 mugs in a snowy field
A watercolor painting of a subway train landing in a garden	A watercolor painting of a subway train with a lime roof rack in a garden	A watercolor painting of a subway train in a garden with warm tungsten lighting	A watercolor painting of a black subway train in a garden	A watercolor painting of 5 subway trains in a garden
An illustration of a train taking off in a cozy kitchen backlit with a subtle rim light, facing left	An illustration of a train in a cozy kitchen with tiny fairy lights in the background	An illustration of a train by a waterfall	An illustration of a train with a lime roof rack in a cozy kitchen	An illustration of a train in a cozy kitchen, shifted slightly downward
A 3D render of a cake sitting in a zen garden, close-up	A 3D render of a cake on the moon surface	A 3D render of a cake in a zen garden, top-down view	A 3D render of a cake in a zen garden under overcast light	A 3D render of 5 cakes in a zen garden
A photo of a sand dune sitting at a carnival	A photo of a sand dune with 1 bronze birds in the branches at a carnival	A photo of 4 sand dunes at a carnival	A photo of a sand dune at a carnival, placed in the foreground	A photo of a sand dune at a carnival, wide-angle view
A photo of a pagoda standing at a skate park with warm tungsten lighting, facing forward	A photo of a pagoda at a skate park, centered	A photo of a pagoda at a carnival	A photo of a pagoda painted lavender at a skate park	A photo of a pagoda at a skate park, top-down view
A 3D render of a pagoda standing inside a cave under neon lighting	A 3D render of 2 pagodas inside a cave	A 3D render of a pagoda in a modern office	A 3D render of a pagoda inside a cave, close-up	A 3D render of a pagoda inside a cave, placed in the foreground
An illustration of a truck parked on a rocky Mars landscape, facing forward	An illustration of a truck on a rocky Mars landscape, make it square-shaped	An illustration of 4 trucks on a rocky Mars landscape	An illustration of a truck on a rocky Mars landscape under golden-hour lighting	An illustration of a truck on a lake pier
An oil painting of a fish leaping out of the water at a cafe	An oil painting of a fish at a cafe under overcast light	An oil painting of a fish at a cafe, facing forward	An oil painting of a fish wearing a blue bandana at a cafe	An oil painting of 2 fish at a cafe
A 3D render of a wolf sleeping in a city street with bright high-key lighting, top-down view	A 3D render of a wolf in a city street, facing forward	A 3D render of 2 wolves in a city street	A 3D render of a wolf in a city street under golden-hour lighting	A 3D render of a wolf with blue fur in a city street
An oil painting of an eagle gliding at an amusement park, top-down view	An oil painting of an eagle gliding at an amusement park	An oil painting of an eagle at an amusement park, facing left	An oil painting of an eagle underwater near coral	An oil painting of an eagle wearing a blue scarf at an amusement park
A watercolor painting of a bear sitting in a mountain meadow, wide-angle view	A watercolor painting of a bear in a mountain meadow, shifted slightly downward	A watercolor painting of a bear with white feathers in a mountain meadow	A watercolor painting of a bear in a mountain meadow, close-up	A watercolor painting of a bear wearing a red bandana in a mountain meadow
A watercolor painting of a drone landing in a desert	A watercolor painting of 5 drones in a desert	A watercolor painting of a drone in a desert, centered	A watercolor painting of a drone in a neon-lit city at night	A watercolor painting of a yellow drone in a desert
A photo of a yoga practitioner sitting on a basketball court with moody low-key lighting	A photo of 4 yoga practitioners on a basketball court	A photo of a yoga practitioner holding a orange guitar on a basketball court	A photo of a yoga practitioner on a basketball court, facing left	A photo of a yoga practitioner surfing on a basketball court
A 3D render of a bridge sitting underwater near a coral reef with warm tungsten lighting, facing right	A 3D render of a bridge underwater near a coral reef, placed in the background	A 3D render of a bridge with a red rainbow in the sky underwater near a coral reef	A 3D render of a bridge with gold flowers underwater near a coral reef	A 3D render of a bridge on a lake pier
A photo of a bus sailing on a rooftop	A photo of a bus on a rooftop, make it heart-shaped	A photo of a bus flying on a rooftop	A photo of a maroon bus on a rooftop	A photo of a bus on a rooftop backlit with a subtle rim light
A 3D render of a bicycle racing in a cyberpunk alley	A 3D render of a bicycle in a zen garden	A 3D render of a bicycle in a cyberpunk alley, placed in the background	A 3D render of 5 bicycles in a cyberpunk alley	A 3D render of a bicycle racing in a cyberpunk alley
An illustration of an umbrella placed in a garden backlit with a subtle rim light	An illustration of an umbrella in a garden under soft studio lighting	An illustration of an umbrella in a garden, placed in the background	An illustration of 3 umbrellas in a garden	An illustration of an umbrella in a cozy kitchen
A photo of a dancer hiking in a snowy field under golden-hour lighting	A photo of a dancer in a snowy field with tiny fairy lights in the background	A photo of a dancer in a navy hat in a snowy field	A photo of a dancer hiking in a snowy field	A photo of a dancer carrying a pink backpack in a snowy field
A photo of a yoga practitioner taking a photo at a train station, wide-angle view	A photo of a yoga practitioner inside a library	A photo of a yoga practitioner in a bronze jacket at a train station	A photo of a yoga practitioner at a train station, shifted slightly upward	A photo of a yoga practitioner carrying a silver backpack at a train station
An oil painting of a soccer player painting in a city street, close-up	An oil painting of a soccer player in a city street, in profile	An oil painting of a soccer player in a blue scarf in a city street	An oil painting of 3 soccer players in a city street	An oil painting of a soccer player reading in a city street
A watercolor painting of a coffee cup standing on a lake pier	A watercolor painting of a coffee cup with a yellow ribbon on a lake pier	A watercolor painting of an orange coffee cup on a lake pier	A watercolor painting of a coffee cup on a lake pier, isometric view	A watercolor painting of a coffee cup on a lake pier, moved to the right side
A watercolor painting of a bee jumping on a music stage with fluorescent indoor lighting	A watercolor painting of a bee wearing a blue scarf on a music stage	A watercolor painting of a bee with purple feathers on a music stage	A watercolor painting of a bee jumping on a music stage	A watercolor painting of a bee on a music stage, close-up
A watercolor painting of a subway train racing in outer space	A watercolor painting of a subway train in outer space with warm tungsten lighting	A watercolor painting of a subway train in outer space, centered	A watercolor painting of a subway train landing in outer space	A watercolor painting of a brown subway train in outer space
A 3D render of a mug standing in a temple courtyard	A 3D render of a mug in a temple courtyard, isometric view	A 3D render of a mug with 1 yellow stickers in a temple courtyard	A 3D render of a mug on a beach at sunset	A 3D render of a mug in a temple courtyard, centered
An illustration of a fox jumping at an open-air market with tiny fairy lights in the background, isometric view	An illustration of 2 foxes at an open-air market	An illustration of a fox playing at an open-air market	An illustration of a fox with purple scales at an open-air market	An illustration of a fox wearing a lime cape at an open-air market
A 3D render of a boat flying in a mountain meadow, overhead view	A 3D render of a boat in a mountain meadow with tiny fairy lights in the background	A 3D render of a boat in a foggy forest	A 3D render of a boat parked in a mountain meadow	A 3D render of 5 boats in a mountain meadow
A watercolor painting of a fish diving in a cozy kitchen with bright high-key lighting	A watercolor painting of a fish in a cozy kitchen, facing left	A watercolor painting of a fish in a desert with dunes	A watercolor painting of 2 fish in a cozy kitchen	A watercolor painting of a fish in a cozy kitchen, moved to the right side
A 3D render of a waterfall sitting on a rocky Mars landscape with moody low-key lighting, facing left	A 3D render of a waterfall on a lake pier	A 3D render of a waterfall on a rocky Mars landscape, facing forward	A 3D render of a waterfall on a rocky Mars landscape, placed in the background	A 3D render of a waterfall with teal leaves on a rocky Mars landscape
A watercolor painting of a book standing in an art studio with warm tungsten lighting, isometric view	A watercolor painting of a book in an art studio backlit with a subtle rim light	A watercolor painting of a cyan book in an art studio	A watercolor painting of 2 books in an art studio	A watercolor painting of a book in an art studio, make it heart-shaped
An oil painting of a tree standing on a rocky Mars landscape with fluorescent indoor lighting, wide-angle view	An oil painting of a tree on a rocky Mars landscape, centered	An oil painting of a tree painted magenta on a rocky Mars landscape	An oil painting of a tree with 2 silver lanterns hanging nearby on a rocky Mars landscape	An oil painting of 3 trees on a rocky Mars landscape
A photo of a tennis racket standing on a lake pier, wide-angle view	A photo of a tennis racket on a lake pier, facing left	A photo of a tennis racket on a beach at sunset	A photo of a tennis racket on a lake pier under soft studio lighting	A photo of a tennis racket with 1 maroon stickers on a lake pier
A 3D render of a vase placed by a riverbank, in profile	A 3D render of a vase by a riverbank backlit with a subtle rim light	A 3D render of a vase with a purple logo by a riverbank	A 3D render of a vase by a riverbank, moved to the left side	A 3D render of a vase by a riverbank, make it square-shaped
A photo of a helicopter moving on a neon-lit street at night with bright high-key lighting	A photo of a helicopter on a neon-lit street at night under golden-hour lighting	A photo of a helicopter on a neon-lit street at night, top-down view	A photo of 3 helicopters on a neon-lit street at night	A photo of a helicopter on a snowy mountain
An illustration of a flower bush sitting in a modern office backlit with a subtle rim light, wide-angle view	An illustration of 5 flower bushes in a modern office	An illustration of a flower bush in a modern office, close-up	An illustration of a flower bush in a modern office, moved to the left side	An illustration of a flower bush in a flower garden
A 3D render of a lighthouse standing on a rocky Mars landscape under neon lighting	A 3D render of a lighthouse with 1 blue birds in the branches on a rocky Mars landscape	A 3D render of a lighthouse on a rocky Mars landscape with warm tungsten lighting	A 3D render of a lighthouse with black flowers on a rocky Mars landscape	A 3D render of a lighthouse on a rocky Mars landscape, top-down view
An illustration of a car racing on a neon-lit street at night	An illustration of a car on a neon-lit street at night, centered	An illustration of a car flying on a neon-lit street at night	An illustration of a car on a neon-lit street at night, isometric view	An illustration of a car with a cyan decal on a neon-lit street at night
A watercolor painting of a runner doing a yoga pose in a sunrise field, wide-angle view	A watercolor painting of a runner skating in a sunrise field	A watercolor painting of a runner in a sunrise field, shifted slightly upward	A watercolor painting of 3 runners in a sunrise field	A watercolor painting of a runner holding a white umbrella in a sunrise field
An illustration of a potted plant sitting on a music stage with bright high-key lighting, overhead view	An illustration of a potted plant on a music stage under neon lighting	An illustration of a potted plant with a bronze logo on a music stage	An illustration of a potted plant on a music stage, placed in the background	An illustration of a potted plant on a music stage, make it heart-shaped
A watercolor painting of a bridge sitting at a cafe, close-up	A watercolor painting of a bridge at a cafe under overcast light	A watercolor painting of a bridge with 2 bronze lanterns hanging nearby at a cafe	A watercolor painting of a bridge with lime flowers at a cafe	A watercolor painting of a bridge in a foggy forest
A 3D render of a runner sitting under a thunderstorm sky, top-down view	A 3D render of a runner under a thunderstorm sky, placed in the background	A 3D render of a runner in a maroon hat under a thunderstorm sky	A 3D render of a runner under a thunderstorm sky under soft studio lighting	A 3D render of a runner under a thunderstorm sky, facing left
A photo of a sand dune sitting near a waterfall with fluorescent indoor lighting	A photo of a sand dune with 1 cyan butterflies around near a waterfall	A photo of a sand dune near a waterfall, moved to the right side	A photo of 2 sand dunes near a waterfall	A photo of a sand dune near a waterfall with tiny fairy lights in the background
A photo of a mountain sitting in a cozy kitchen, facing forward	A photo of a mountain inside a library	A photo of a mountain painted green in a cozy kitchen	A photo of a mountain in a cozy kitchen with bright high-key lighting	A photo of a mountain in a cozy kitchen, overhead view
An oil painting of a tennis racket sitting at a cafe with bright high-key lighting	An oil painting of a tennis racket on a rainy street	An oil painting of an orange tennis racket at a cafe	An oil painting of 4 tennis rackets at a cafe	An oil painting of a tennis racket at a cafe, wide-angle view
A watercolor painting of a truck parked in a snowy field	A watercolor painting of a truck in a snowy field, overhead view	A watercolor painting of a truck in a snowy field, centered	A watercolor painting of a truck in a snowy field, make it cylindrical	A watercolor painting of a truck with 1 red balloons tied to it in a snowy field
A watercolor painting of a coffee cup displayed at a skate park with bright high-key lighting, top-down view	A watercolor painting of 3 coffee cups at a skate park	A watercolor painting of a coffee cup at a skate park, centered	A watercolor painting of a coffee cup at a skate park with fluorescent indoor lighting	A watercolor painting of a gold coffee cup at a skate park
A 3D render of a runner skating on a music stage, facing forward	A 3D render of a runner on a music stage, placed in the foreground	A 3D render of a runner holding a navy guitar on a music stage	A 3D render of a runner on a music stage backlit with a subtle rim light	A 3D render of a runner in a beige scarf on a music stage
A watercolor painting of an astronaut running at a train station	A watercolor painting of an astronaut on a lake pier	A watercolor painting of an astronaut at a train station, overhead view	A watercolor painting of an astronaut at a train station backlit with a subtle rim light	A watercolor painting of an astronaut typing at a train station
An illustration of a bee running on a rooftop	An illustration of a bee walking on a rooftop	An illustration of a bee on a rooftop under neon lighting	An illustration of a bee wearing a green hat on a rooftop	An illustration of a bee on a rooftop, centered
A watercolor painting of a soccer player typing near a waterfall	A watercolor painting of a soccer player on a snowy mountain	A watercolor painting of a soccer player in a white jacket near a waterfall	A watercolor painting of a soccer player near a waterfall under overcast light	A watercolor painting of a soccer player waving near a waterfall
An oil painting of a photographer skating at a carnival	An oil painting of a photographer in a orange scarf at a carnival	An oil painting of a photographer carrying a silver backpack at a carnival	An oil painting of 5 photographers at a carnival	An oil painting of a photographer at a carnival, isometric view
A watercolor painting of a dancer dancing on a beach, top-down view	A watercolor painting of a dancer on a beach, shifted slightly downward	A watercolor painting of a dancer in a magenta dress on a beach	A watercolor painting of a dancer on a beach under overcast light	A watercolor painting of a dancer on a beach, close-up
A 3D render of a coffee cup displayed near a waterfall, top-down view	A 3D render of a coffee cup near a waterfall, close-up	A 3D render of a coffee cup on a rainy street	A 3D render of a coffee cup near a waterfall, moved to the right side	A 3D render of a coffee cup with a black logo near a waterfall
A 3D render of a lion playing in a desert with warm tungsten lighting, facing left	A 3D render of a lion in a zen garden	A 3D render of a lion in a desert, in profile	A 3D render of a lion with a purple collar in a desert	A 3D render of a lion playing in a desert
A 3D render of a windmill standing on a basketball court with fluorescent indoor lighting	A 3D render of a windmill on a basketball court under soft studio lighting	A 3D render of a windmill on a basketball court, facing left	A 3D render of a windmill in a modern office	A 3D render of 2 windmills on a basketball court
A 3D render of a waterfall sitting in a temple courtyard with tiny fairy lights in the background	A 3D render of 3 waterfalls in a temple courtyard	A 3D render of a waterfall with a purple rainbow in the sky in a temple courtyard	A 3D render of a waterfall painted cyan in a temple courtyard	A 3D render of a waterfall in a temple courtyard, close-up
A photo of a motorcycle sailing on a basketball court, in profile	A photo of a motorcycle on a basketball court under overcast light	A photo of a motorcycle on a basketball court, moved to the right side	A photo of 4 motorcycles on a basketball court	A photo of an orange motorcycle on a basketball court
A watercolor painting of a squirrel jumping at an open-air market	A watercolor painting of a squirrel at an open-air market, shifted slightly downward	A watercolor painting of a squirrel in a flower garden	A watercolor painting of a squirrel at an open-air market with fluorescent indoor lighting	A watercolor painting of a squirrel at an open-air market, isometric view
A 3D render of a guitarist running on a music stage, close-up	A 3D render of a guitarist on a music stage, overhead view	A 3D render of a guitarist underwater near coral	A 3D render of a guitarist posing on a music stage	A 3D render of a guitarist wearing blue glasses on a music stage
A watercolor painting of a yoga practitioner typing in a foggy forest under neon lighting	A watercolor painting of a yoga practitioner wearing a black jacket in a foggy forest	A watercolor painting of a yoga practitioner in a foggy forest, close-up	A watercolor painting of a yoga practitioner in a foggy forest, shifted slightly downward	A watercolor painting of a yoga practitioner painting in a foggy forest
An oil painting of a truck drifting in a castle hall, top-down view	An oil painting of 5 trucks in a castle hall	An oil painting of a truck in a castle hall, isometric view	An oil painting of a truck underwater near coral	An oil painting of a truck with 3 black stickers on the door in a castle hall
A 3D render of an eagle gliding with a city skyline behind under overcast light, facing right	A 3D render of 2 eagles with a city skyline behind	A 3D render of an eagle flying with a city skyline behind	A 3D render of an eagle with a city skyline behind, moved to the right side	A 3D render of an eagle with lime feathers with a city skyline behind
A watercolor painting of a bicycle drifting in an art studio	A watercolor painting of a bicycle in an art studio, top-down view	A watercolor painting of a magenta bicycle in an art studio	A watercolor painting of a bicycle with 4 maroon stickers on the door in an art studio	A watercolor painting of a bicycle in an art studio with bright high-key lighting
A 3D render of a helicopter sailing in a medieval village, facing left	A 3D render of a helicopter in a medieval village with moody low-key lighting	A 3D render of a helicopter in a medieval village, shifted slightly downward	A 3D render of a helicopter sailing in a medieval village	A 3D render of a helicopter with a teal decal in a medieval village
An illustration of a bee running in a city street under overcast light, facing left	An illustration of a bee wearing teal glasses in a city street	An illustration of a bee with cyan feathers in a city street	An illustration of a bee in a flower garden	An illustration of 5 bees in a city street
A watercolor painting of a bicycle parked in an art studio	A watercolor painting of a bicycle in an art studio, make it square-shaped	A watercolor painting of 5 bicycles in an art studio	A watercolor painting of a bicycle in an art studio, placed in the background	A watercolor painting of a bicycle in an art studio, facing right
A watercolor painting of a bridge sitting on the moon	A watercolor painting of a bridge on the moon with warm tungsten lighting	A watercolor painting of a bridge with 1 white birds in the branches on the moon	A watercolor painting of a bridge with silver flowers on the moon	A watercolor painting of 5 bridges on the moon
An illustration of a dolphin swimming in a mountain meadow under soft studio lighting, in profile	An illustration of a dolphin in a mountain meadow, wide-angle view	An illustration of a dolphin wearing a teal scarf in a mountain meadow	An illustration of a dolphin on a space station	An illustration of a dolphin in a mountain meadow, moved to the right side
An oil painting of a painting placed in a medieval village under soft studio lighting, overhead view	An oil painting of a painting in a neon-lit city at night	An oil painting of an orange painting in a medieval village	An oil painting of a painting in a medieval village under soft studio lighting	An oil painting of a painting with a teal ribbon in a medieval village
A 3D render of a train flying in a sunrise field with tiny fairy lights in the background, top-down view	A 3D render of 4 trains in a sunrise field	A 3D render of a train moving in a sunrise field	A 3D render of a train in a sunrise field, shifted slightly downward	A 3D render of a train with 2 silver balloons tied to it in a sunrise field
A watercolor painting of a helicopter parked in a garden, top-down view	A watercolor painting of a helicopter at sunrise in a meadow	A watercolor painting of a helicopter in a garden, make it cylindrical	A watercolor painting of a helicopter with a teal decal in a garden	A watercolor painting of a helicopter in a garden with moody low-key lighting
A 3D render of a waterfall sitting underwater near a coral reef backlit with a subtle rim light	A 3D render of a waterfall underwater near a coral reef, close-up	A 3D render of a waterfall with purple leaves underwater near a coral reef	A 3D render of a waterfall on a space station	A 3D render of a waterfall underwater near a coral reef, shifted slightly upward
A watercolor painting of a castle sitting on a lake pier	A watercolor painting of 4 castles on a lake pier	A watercolor painting of a castle on a lake pier, isometric view	A watercolor painting of a castle on a lake pier with moody low-key lighting	A watercolor painting of a castle with maroon leaves on a lake pier
A watercolor painting of a boat drifting on a neon-lit street at night, overhead view	A watercolor painting of 5 boats on a neon-lit street at night	A watercolor painting of a boat with 1 yellow stickers on the door on a neon-lit street at night	A watercolor painting of a boat on a neon-lit street at night, make it round	A watercolor painting of a boat on a neon-lit street at night, placed in the background
A watercolor painting of a car parked at a skate park	A watercolor painting of a car taking off at a skate park	A watercolor painting of a bronze car at a skate park	A watercolor painting of a car with a blue decal at a skate park	A watercolor painting of a car at a carnival
A photo of a deer jumping on a music stage with tiny fairy lights in the background	A photo of a deer on a music stage, wide-angle view	A photo of a deer wearing a maroon hat on a music stage	A photo of 4 deer on a music stage	A photo of a deer on a music stage, shifted slightly upward
A photo of a motorcycle sailing on a rocky Mars landscape, facing left	A photo of a motorcycle in a cozy kitchen	A photo of a motorcycle racing on a rocky Mars landscape	A photo of a motorcycle on a rocky Mars landscape, facing right	A photo of a motorcycle on a rocky Mars landscape, placed in the background
An illustration of a surfer playing guitar on a lake pier with bright high-key lighting	An illustration of 4 surfers on a lake pier	An illustration of a surfer on a lake pier, centered	An illustration of a surfer on a lake pier	An illustration of a surfer on a lake pier with moody low-key lighting
A watercolor painting of a pagoda standing in a sci-fi corridor	A watercolor painting of 3 pagodas in a sci-fi corridor	A watercolor painting of a pagoda in a sci-fi corridor with moody low-key lighting	A watercolor painting of a pagoda with 3 lavender birds in the branches in a sci-fi corridor	A watercolor painting of a pagoda in a sci-fi corridor, moved to the left side
An oil painting of a mountain sitting in a cyberpunk alley with moody low-key lighting	An oil painting of a mountain with 2 lime birds in the branches in a cyberpunk alley	An oil painting of a mountain in a cyberpunk alley, facing left	An oil painting of 5 mountains in a cyberpunk alley	An oil painting of a mountain with red leaves in a cyberpunk alley
A watercolor painting of a castle sitting in a garden under soft studio lighting, top-down view	A watercolor painting of a castle in a garden, placed in the foreground	A watercolor painting of a castle on a beach at sunset	A watercolor painting of a castle with a gold rainbow in the sky in a garden	A watercolor painting of a castle in a garden with bright high-key lighting
An illustration of a butterfly lying down on a lake pier	An illustration of a butterfly lying down on a lake pier	An illustration of a butterfly on a lake pier, placed in the foreground	An illustration of a butterfly on a lake pier, facing forward	An illustration of a butterfly on a lake pier with tiny fairy lights in the background
A watercolor painting of a dolphin swimming in an art studio with warm tungsten lighting	A watercolor painting of a dolphin in an art studio with moody low-key lighting	A watercolor painting of 5 dolphins in an art studio	A watercolor painting of a dolphin in an art studio, overhead view	A watercolor painting of a dolphin in a desert with dunes
An oil painting of a chef running on a rocky Mars landscape	An oil painting of a chef sitting on a rocky Mars landscape	An oil painting of a chef holding a navy coffee cup on a rocky Mars landscape	An oil painting of a chef on a rocky Mars landscape, top-down view	An oil painting of a chef inside a library
A photo of a backpack displayed on a neon-lit street at night	A photo of a backpack on a neon-lit street at night, make it triangular	A photo of a backpack with a white ribbon on a neon-lit street at night	A photo of a backpack on a neon-lit street at night under overcast light	A photo of a backpack on a neon-lit street at night, shifted slightly downward
An oil painting of a waterfall sitting at a skate park under overcast light, facing forward	An oil painting of a waterfall inside a library	An oil painting of a waterfall at a skate park, shifted slightly upward	An oil painting of a waterfall at a skate park with tiny fairy lights in the background	An oil painting of a waterfall with lavender flowers at a skate park
A 3D render of a bridge sitting at an amusement park backlit with a subtle rim light	A 3D render of a bridge in a foggy forest	A 3D render of a bridge at an amusement park, overhead view	A 3D render of a bridge with red flowers at an amusement park	A 3D render of a bridge with a gold rainbow in the sky at an amusement park
An oil painting of a hiker waving on the moon, facing left	An oil painting of a hiker carrying a black backpack on the moon	An oil painting of a hiker on the moon with tiny fairy lights in the background	An oil painting of a hiker in a lavender jacket on the moon	An oil painting of a hiker on the moon, top-down view
A watercolor painting of a bee walking on a basketball court with moody low-key lighting, in profile	A watercolor painting of a bee on a basketball court, facing right	A watercolor painting of a bee on a basketball court, shifted slightly upward	A watercolor painting of a bee with blue scales on a basketball court	A watercolor painting of a bee on a basketball court with bright high-key lighting
An oil painting of a bus flying by a riverbank, close-up	An oil painting of a bus sailing by a riverbank	An oil painting of a bus with a brown roof rack by a riverbank	An oil painting of a bus by a riverbank, placed in the background	An oil painting of a bus by a riverbank under neon lighting
An oil painting of a burger standing underwater near a coral reef, wide-angle view	An oil painting of an orange burger underwater near a coral reef	An oil painting of a burger underwater near a coral reef with moody low-key lighting	An oil painting of a burger underwater near a coral reef, make it cylindrical	An oil painting of a burger underwater near a coral reef, overhead view
An illustration of a helicopter racing in a medieval village	An illustration of a helicopter flying in a medieval village	An illustration of a helicopter in a medieval village with moody low-key lighting	An illustration of 2 helicopters in a medieval village	An illustration of a helicopter in a desert with dunes
An illustration of a butterfly jumping at a skate park under overcast light	An illustration of a butterfly walking at a skate park	An illustration of 3 butterflies at a skate park	An illustration of a butterfly in a modern office	An illustration of a butterfly with cyan scales at a skate park
A watercolor painting of a helicopter moving in an art studio with bright high-key lighting, wide-angle view	A watercolor painting of a teal helicopter in an art studio	A watercolor painting of a helicopter in an art studio, in profile	A watercolor painting of a helicopter with a navy roof rack in an art studio	A watercolor painting of a helicopter in an art studio, shifted slightly upward
A photo of a whale swimming on a rooftop	A photo of a whale on a rooftop, shifted slightly downward	A photo of a whale swimming on a rooftop	A photo of 4 whales on a rooftop	A photo of a whale with blue scales on a rooftop
A watercolor painting of a soccer ball sitting in a cozy kitchen, isometric view	A watercolor painting of a soccer ball in a cozy kitchen under overcast light	A watercolor painting of a soccer ball at sunrise in a meadow	A watercolor painting of a purple soccer ball in a cozy kitchen	A watercolor painting of a soccer ball in a cozy kitchen, make it round
An illustration of a fox sleeping in a foggy forest, facing left	An illustration of a fox on a rainy street	An illustration of a fox in a foggy forest with fluorescent indoor lighting	An illustration of 5 foxes in a foggy forest	An illustration of a fox in a foggy forest, placed in the foreground
A photo of a fish swimming in an art studio, wide-angle view	A photo of a fish in an art studio, overhead view	A photo of a fish in an art studio backlit with a subtle rim light	A photo of 5 fish in an art studio	A photo of a fish with gold scales in an art studio
A watercolor painting of a bicycle drifting in a foggy forest with moody low-key lighting	A watercolor painting of a bicycle in a foggy forest backlit with a subtle rim light	A watercolor painting of a bicycle drifting in a foggy forest	A watercolor painting of a bicycle in a foggy forest, placed in the foreground	A watercolor painting of a bicycle in a foggy forest, make it heart-shaped
An oil painting of a surfer hiking inside a library with fluorescent indoor lighting, top-down view	An oil painting of a surfer holding a blue microphone inside a library	An oil painting of a surfer inside a library under golden-hour lighting	An oil painting of a surfer inside a library, wide-angle view	An oil painting of a surfer in a cyan dress inside a library
An illustration of a motorcycle parked in a snowy field, top-down view	An illustration of a motorcycle racing in a snowy field	An illustration of a motorcycle in a snowy field, facing forward	An illustration of a motorcycle with a lavender decal in a snowy field	An illustration of a motorcycle in a snowy field, make it cylindrical
An oil painting of a parrot spreading wings on a music stage under overcast light, close-up	An oil painting of a parrot with bronze shell on a music stage	An oil painting of a parrot in a flower garden	An oil painting of a parrot on a music stage, facing right	An oil painting of 4 parrots on a music stage
A 3D render of a mirror sitting in a medieval village with fluorescent indoor lighting	A 3D render of a mirror in a medieval village, make it round	A 3D render of 4 mirrors in a medieval village	A 3D render of a brown mirror in a medieval village	A 3D render of a mirror at sunrise in a meadow
A photo of a lizard jumping in a forest, facing right	A photo of a lizard wearing a beige hat in a forest	A photo of a lizard sitting in a forest	A photo of a lizard at a carnival	A photo of a lizard in a forest with bright high-key lighting
An illustration of a tree standing on a basketball court, facing forward	An illustration of 3 trees on a basketball court	An illustration of a tree with lime leaves on a basketball court	An illustration of a tree on a basketball court with bright high-key lighting	An illustration of a tree with 2 pink lanterns hanging nearby on a basketball court
A photo of a windmill standing in a modern office under overcast light	A photo of a windmill in a modern office, overhead view	A photo of a windmill in a modern office backlit with a subtle rim light	A photo of 5 windmills in a modern office	A photo of a windmill in a desert with dunes
An illustration of a coffee cup displayed by a riverbank under golden-hour lighting	An illustration of a cyan coffee cup by a riverbank	An illustration of a coffee cup on a snowy mountain	An illustration of a coffee cup by a riverbank, facing forward	An illustration of 3 coffee cups by a riverbank
A 3D render of a bridge sitting in a foggy forest under golden-hour lighting	A 3D render of a bridge in a foggy forest backlit with a subtle rim light	A 3D render of a bridge in a foggy forest, facing forward	A 3D render of a bridge in a foggy forest, centered	A 3D render of a bridge in a foggy forest
An oil painting of a subway train landing at an open-air market	An oil painting of a subway train with a red racing stripe at an open-air market	An oil painting of a subway train at an open-air market, moved to the left side	An oil painting of a subway train at an open-air market, make it heart-shaped	An oil painting of a lime subway train at an open-air market
An illustration of a castle sitting in a sci-fi corridor	An illustration of 2 castles in a sci-fi corridor	An illustration of a castle in a sci-fi corridor, moved to the right side	An illustration of a castle painted silver in a sci-fi corridor	An illustration of a castle with 1 blue lanterns hanging nearby in a sci-fi corridor
A watercolor painting of a yoga practitioner jumping on a rooftop with moody low-key lighting, facing right	A watercolor painting of a yoga practitioner holding a maroon skateboard on a rooftop	A watercolor painting of a yoga practitioner in a beige hat on a rooftop	A watercolor painting of 4 yoga practitioners on a rooftop	A watercolor painting of a yoga practitioner on a rooftop, in profile
An illustration of an elephant running in a mountain meadow, top-down view	An illustration of an elephant in a mountain meadow with tiny fairy lights in the background	An illustration of 2 elephants in a mountain meadow	An illustration of an elephant on a space station	An illustration of an elephant with a black collar in a mountain meadow
An oil painting of a backpack standing inside an airport terminal, facing right	An oil painting of a backpack inside an airport terminal, centered	An oil painting of a backpack inside an airport terminal, make it heart-shaped	An oil painting of a yellow backpack inside an airport terminal	An oil painting of a backpack inside an airport terminal with bright high-key lighting
An oil painting of a lizard playing at a skate park, facing right	An oil painting of a lizard playing at a skate park	An oil painting of a lizard at a skate park with tiny fairy lights in the background	An oil painting of a lizard wearing a yellow hat at a skate park	An oil painting of a lizard with beige shell at a skate park
An illustration of a fox sitting in a castle hall	An illustration of a fox running in a castle hall	An illustration of a fox with pink fur in a castle hall	An illustration of 3 foxes in a castle hall	An illustration of a fox wearing magenta glasses in a castle hall
A photo of a skateboard placed on a lake pier	A photo of a skateboard on a lake pier, shifted slightly upward	A photo of a skateboard on a lake pier under soft studio lighting	A photo of a skateboard on a lake pier, facing right	A photo of a skateboard in a cozy kitchen
An illustration of a painting sitting in a medieval village, facing forward	An illustration of a painting in a medieval village, in profile	An illustration of 3 paintings in a medieval village	An illustration of a painting with a yellow ribbon in a medieval village	An illustration of a painting in a medieval village, placed in the background
A watercolor painting of an airplane moving in a sunrise field, wide-angle view	A watercolor painting of an airplane in a sunrise field with bright high-key lighting	A watercolor painting of an airplane in a sunrise field, make it square-shaped	A watercolor painting of 3 airplanes in a sunrise field	A watercolor painting of an airplane in a sunrise field, centered
An oil painting of a tennis racket displayed near a waterfall	An oil painting of a tennis racket near a waterfall, centered	An oil painting of a tennis racket with 2 blue stickers near a waterfall	An oil painting of a gold tennis racket near a waterfall	An oil painting of a tennis racket near a waterfall, make it square-shaped
A 3D render of a flower bush sitting in outer space	A 3D render of a flower bush in outer space backlit with a subtle rim light	A 3D render of a flower bush at a carnival	A 3D render of a flower bush with a purple rainbow in the sky in outer space	A 3D render of a flower bush in outer space, isometric view
A photo of a soccer player playing guitar in a zen garden, facing forward	A photo of a soccer player in a lime shirt in a zen garden	A photo of a soccer player typing in a zen garden	A photo of a soccer player on a lake pier	A photo of a soccer player in a zen garden under neon lighting
An illustration of a lizard sitting in a sunrise field under golden-hour lighting	An illustration of a lizard with bronze shell in a sunrise field	An illustration of a lizard in a sunrise field under neon lighting	An illustration of a lizard playing in a sunrise field	An illustration of a lizard wearing a lavender scarf in a sunrise field
A watercolor painting of a squirrel sitting at a train station with moody low-key lighting, top-down view	A watercolor painting of a squirrel at a train station under soft studio lighting	A watercolor painting of a squirrel playing at a train station	A watercolor painting of a squirrel with blue fur at a train station	A watercolor painting of a squirrel on a space station
A photo of a fox sleeping near a waterfall under golden-hour lighting, overhead view	A photo of a fox jumping near a waterfall	A photo of a fox near a waterfall under overcast light	A photo of 2 foxes near a waterfall	A photo of a fox with lime feathers near a waterfall
A watercolor painting of a boat parked on a lake pier with bright high-key lighting, isometric view	A watercolor painting of a boat drifting on a lake pier	A watercolor painting of a boat with 2 white stickers on the door on a lake pier	A watercolor painting of a boat in a zen garden	A watercolor painting of a boat on a lake pier with warm tungsten lighting
An illustration of a helicopter parked at a cafe under overcast light, wide-angle view	An illustration of a cyan helicopter at a cafe	An illustration of a helicopter at a cafe under neon lighting	An illustration of a helicopter at a cafe, make it cylindrical	An illustration of a helicopter with a white racing stripe at a cafe
An oil painting of a lamp placed in a sci-fi corridor under overcast light	An oil painting of a lamp in a sci-fi corridor with fluorescent indoor lighting	An oil painting of a lamp with 2 teal stickers in a sci-fi corridor	An oil painting of a lamp in a sci-fi corridor, moved to the right side	An oil painting of 5 lamps in a sci-fi corridor
A watercolor painting of a waterfall sitting in a sci-fi corridor	A watercolor painting of a waterfall in a sci-fi corridor with bright high-key lighting	A watercolor painting of 2 waterfalls in a sci-fi corridor	A watercolor painting of a waterfall in a sci-fi corridor, centered	A watercolor painting of a waterfall in a sci-fi corridor, facing right
An oil painting of an airplane landing in a cozy kitchen under overcast light	An oil painting of an airplane taking off in a cozy kitchen	An oil painting of an airplane in a cozy kitchen, shifted slightly downward	An oil painting of a white airplane in a cozy kitchen	An oil painting of an airplane in a cozy kitchen, overhead view
An illustration of a horse standing inside an airport terminal, isometric view	An illustration of a horse inside an airport terminal with bright high-key lighting	An illustration of 4 horses inside an airport terminal	An illustration of a horse wearing a blue cape inside an airport terminal	An illustration of a horse jumping inside an airport terminal
An oil painting of a bicycle moving on a music stage, isometric view	An oil painting of 5 bicycles on a music stage	An oil painting of an orange bicycle on a music stage	An oil painting of a bicycle on a music stage, in profile	An oil painting of a bicycle on a music stage, placed in the foreground
An illustration of a pagoda standing in a desert with fluorescent indoor lighting	An illustration of a pagoda in a desert, placed in the background	An illustration of a pagoda with magenta leaves in a desert	An illustration of a pagoda at a carnival	An illustration of a pagoda in a desert under neon lighting
A 3D render of a drum standing on a rocky Mars landscape with fluorescent indoor lighting, close-up	A 3D render of a drum on a rocky Mars landscape under soft studio lighting	A 3D render of a drum on a rocky Mars landscape, isometric view	A 3D render of 4 drums on a rocky Mars landscape	A 3D render of a maroon drum on a rocky Mars landscape
A 3D render of a waterfall sitting in a garden, overhead view	A 3D render of a waterfall on a lake pier	A 3D render of a waterfall in a garden under overcast light	A 3D render of a waterfall in a garden, facing left	A 3D render of a waterfall in a garden, shifted slightly upward
An oil painting of a lion jumping in a garden	An oil painting of a lion with maroon shell in a garden	An oil painting of a lion in a garden, wide-angle view	An oil painting of a lion in a garden, shifted slightly upward	An oil painting of a lion walking in a garden
An oil painting of a skateboarder smiling in a sunrise field, overhead view	An oil painting of 4 skateboarders in a sunrise field	An oil painting of a skateboarder wearing a white scarf in a sunrise field	An oil painting of a skateboarder in a teal shirt in a sunrise field	An oil painting of a skateboarder in a cozy kitchen
A watercolor painting of a flower bush sitting at a carnival, close-up	A watercolor painting of a flower bush with brown flowers at a carnival	A watercolor painting of a flower bush at a carnival under golden-hour lighting	A watercolor painting of a flower bush at a carnival, shifted slightly downward	A watercolor painting of a flower bush at a carnival, facing left
A watercolor painting of a bridge sitting on the moon, facing left	A watercolor painting of a bridge on the moon, isometric view	A watercolor painting of a bridge on a beach at sunset	A watercolor painting of 2 bridges on the moon	A watercolor painting of a bridge with a white rainbow in the sky on the moon
An illustration of a lighthouse standing inside an airport terminal under neon lighting, in profile	An illustration of a lighthouse with orange leaves inside an airport terminal	An illustration of a lighthouse inside an airport terminal, isometric view	An illustration of a lighthouse inside an airport terminal, moved to the left side	An illustration of a lighthouse with a bronze rainbow in the sky inside an airport terminal
A photo of a butterfly walking at an open-air market under golden-hour lighting	A photo of a butterfly at an open-air market, shifted slightly upward	A photo of a butterfly with lavender shell at an open-air market	A photo of a butterfly on a lake pier	A photo of a butterfly at an open-air market, overhead view
A photo of a car taking off under a thunderstorm sky with warm tungsten lighting	A photo of a car parked under a thunderstorm sky	A photo of a car with 1 green balloons tied to it under a thunderstorm sky	A photo of a cyan car under a thunderstorm sky	A photo of a car inside a library
An illustration of a skateboarder surfing inside an airport terminal	An illustration of a skateboarder surfing inside an airport terminal	An illustration of a skateboarder in a desert with dunes	An illustration of a skateboarder in a black scarf inside an airport terminal	An illustration of a skateboarder inside an airport terminal, facing forward
An oil painting of a dog jumping on a sunset beach	An oil painting of 4 dogs on a sunset beach	An oil painting of a dog with teal fur on a sunset beach	An oil painting of a dog with a white collar on a sunset beach	An oil painting of a dog on a sunset beach, isometric view
A watercolor painting of a guitarist jumping in a castle hall under overcast light	A watercolor painting of a guitarist in a castle hall with warm tungsten lighting	A watercolor painting of a guitarist in a castle hall, wide-angle view	A watercolor painting of a guitarist reading in a castle hall	A watercolor painting of a guitarist holding a teal microphone in a castle hall
A photo of a train taking off in a medieval village	A photo of a train with 2 pink stickers on the door in a medieval village	A photo of a white train in a medieval village	A photo of a train in a medieval village, in profile	A photo of 3 trains in a medieval village
A 3D render of a laptop standing in a medieval village with moody low-key lighting, in profile	A 3D render of a laptop in a medieval village, make it triangular	A 3D render of a laptop in a medieval village, facing right	A 3D render of a laptop in a medieval village, shifted slightly downward	A 3D render of a laptop on a beach at sunset
A 3D render of a camera standing near a waterfall with fluorescent indoor lighting, wide-angle view	A 3D render of an orange camera near a waterfall	A 3D render of a camera near a waterfall, wide-angle view	A 3D render of 3 cameras near a waterfall	A 3D render of a camera with a bronze logo near a waterfall
An oil painting of a chef typing inside a library	An oil painting of a chef inside a library with fluorescent indoor lighting	An oil painting of a chef in a lime hat inside a library	An oil painting of 5 cheves inside a library	An oil painting of a chef taking a photo inside a library
A 3D render of a helicopter landing on the moon	A 3D render of 4 helicopters on the moon	A 3D render of a helicopter with 4 teal balloons tied to it on the moon	A 3D render of a helicopter on the moon with tiny fairy lights in the background	A 3D render of a helicopter on the moon, shifted slightly upward
An illustration of a dancer dancing in a sci-fi corridor under neon lighting	An illustration of a dancer taking a photo in a sci-fi corridor	An illustration of a dancer in a sci-fi corridor with tiny fairy lights in the background	An illustration of a dancer carrying a red backpack in a sci-fi corridor	An illustration of a dancer in a sci-fi corridor, wide-angle view
A watercolor painting of a chair standing inside a library	A watercolor painting of a chair with a pink logo inside a library	A watercolor painting of a chair inside a library under neon lighting	A watercolor painting of 2 chairs inside a library	A watercolor painting of a chair inside a library, placed in the background
A photo of a dancer typing in a temple courtyard, facing forward	A photo of 2 dancers in a temple courtyard	A photo of a dancer in a temple courtyard, moved to the left side	A photo of a dancer in a temple courtyard with bright high-key lighting	A photo of a dancer reading in a temple courtyard
An illustration of a dog standing on a rocky Mars landscape with moody low-key lighting	An illustration of a dog on a rocky Mars landscape, moved to the right side	An illustration of a dog wearing a green scarf on a rocky Mars landscape	An illustration of a dog in a desert with dunes	An illustration of a dog with yellow fur on a rocky Mars landscape
A photo of a wolf jumping underwater near a coral reef with warm tungsten lighting, facing right	A photo of a wolf wearing a teal bandana underwater near a coral reef	A photo of a wolf walking underwater near a coral reef	A photo of a wolf by a waterfall	A photo of a wolf underwater near a coral reef, in profile
An illustration of a cyclist hiking in a sunrise field	An illustration of a cyclist holding a lavender microphone in a sunrise field	An illustration of a cyclist in a sunrise field, shifted slightly downward	An illustration of 5 cyclists in a sunrise field	An illustration of a cyclist in a flower garden
A 3D render of an airplane moving with a city skyline behind, overhead view	A 3D render of an airplane in a modern office	A 3D render of an airplane moving with a city skyline behind	A 3D render of an airplane with a city skyline behind with fluorescent indoor lighting	A 3D render of an airplane with a city skyline behind, make it round
A watercolor painting of an airplane parked in a sunrise field, facing left	A watercolor painting of 2 airplanes in a sunrise field	A watercolor painting of an airplane in a sunrise field, shifted slightly upward	A watercolor painting of an airplane in a sunrise field, make it heart-shaped	A watercolor painting of an airplane sailing in a sunrise field
An illustration of a bridge sitting inside an airport terminal under soft studio lighting, in profile	An illustration of a bridge on a beach at sunset	An illustration of a bridge inside an airport terminal, wide-angle view	An illustration of a bridge inside an airport terminal under soft studio lighting	An illustration of a bridge painted black inside an airport terminal
A photo of a lizard sitting in a zen garden with tiny fairy lights in the background	A photo of a lizard wearing blue glasses in a zen garden	A photo of 5 lizards in a zen garden	A photo of a lizard sleeping in a zen garden	A photo of a lizard in a zen garden, shifted slightly downward
An illustration of a boxing glove on a ring apron with light shadows	An illustration of a blue boxing glove on a ring apron with light shadows	An illustration of 2 boxing gloves on a ring apron with light shadows	An illustration of a boxing glove on a ring apron with light shadows with a sports bag beside it	An illustration of a boxing glove on a ring apron with light shadows centered in the frame
A watercolor painting of a fisher on a wooden pier with fairy lights	A watercolor painting of a fisher on a wooden pier with fairy lights wearing a green jacket	A watercolor painting of 2 fishers on a wooden pier with fairy lights	A watercolor painting of a fisher on a wooden pier with fairy lights wearing a straw hat	A watercolor painting of a fisher on a wooden pier with fairy lights on the right side of the frame
A 3D render of a squirrel on a wooden fence near a street lamp	A 3D render of a black squirrel on a wooden fence near a street lamp	A 3D render of 2 squirrels on a wooden fence near a street lamp	A 3D render of a squirrel on a wooden fence near a street lamp wearing blue glasses	A 3D render of a squirrel on a wooden fence near a street lamp in the foreground
A watercolor painting of a horse walking along a beach	A watercolor painting of a gray horse walking along a beach	A watercolor painting of 2 horses walking along a beach	A watercolor painting of a horse walking along a beach with a frisbee nearby	A watercolor painting of a horse walking along a beach on the left side of the frame
A photo of a tiger in tall grass on a sunny afternoon	A photo of a white tiger in tall grass on a sunny afternoon	A photo of 2 tigers in tall grass on a sunny afternoon	A photo of a tiger in tall grass on a sunny afternoon with a frisbee nearby	A photo of a tiger in tall grass on a sunny afternoon on the right side of the frame
An illustration of a skyscraper in a city center	An illustration of a gray skyscraper in a city center	An illustration of 2 skyscrapers in a city center	An illustration of a skyscraper in a city center with a small flag above the door	An illustration of a skyscraper in a city center in the foreground
An illustration of a tiger in tall grass with fallen leaves around	An illustration of a white tiger in tall grass with fallen leaves around	An illustration of 2 tigers in tall grass with fallen leaves around	An illustration of a tiger in tall grass with fallen leaves around with a frisbee nearby	An illustration of a tiger in tall grass with fallen leaves around sitting instead
An illustration of a subway car in an underground station near a street market	An illustration of a blue subway car in an underground station near a street market	An illustration of 2 subway cars in an underground station near a street market	An illustration of a subway car in an underground station near a street market with a bicycle mounted on the back	An illustration of a subway car in an underground station near a street market on top of a small pedestal
A watercolor painting of a maple sapling in a garden bed	A watercolor painting of a maple sapling in a garden bed in a terracotta pot	A watercolor painting of 2 maple saplings in a garden bed	A watercolor painting of a maple sapling in a garden bed with a small watering can next to it	A watercolor painting of a maple sapling in a garden bed on the left side of the frame
A digital art image of a eagle flying over mountains with confetti on the ground	A digital art image of a black eagle flying over mountains with confetti on the ground	A digital art image of 2 eagles flying over mountains with confetti on the ground	A digital art image of a eagle flying over mountains with confetti on the ground wearing blue glasses	A digital art image of a eagle flying over mountains with confetti on the ground in the background
An illustration of a train crossing a steel bridge with fairy lights	An illustration of a green train crossing a steel bridge with fairy lights	An illustration of 2 trains crossing a steel bridge with fairy lights	An illustration of a train crossing a steel bridge with fairy lights with a small flag on the antenna	An illustration of a train crossing a steel bridge with fairy lights tilted slightly to the left
A 3D render of a chair beside a window next to a window	A 3D render of a orange chair beside a window next to a window	A 3D render of 3 chairs beside a window next to a window	A 3D render of a chair beside a window next to a window with a folded note next to it	A 3D render of a chair beside a window next to a window centered in the frame
A watercolor painting of a hockey stick on an ice rink	A watercolor painting of a white hockey stick on an ice rink	A watercolor painting of 3 hockey sticks on an ice rink	A watercolor painting of a hockey stick on an ice rink with a water bottle nearby	A watercolor painting of a hockey stick on an ice rink on top of a small pedestal
A photo of a aloe vera on a kitchen counter	A photo of a aloe vera on a kitchen counter in a terracotta pot	A photo of 2 aloe veras on a kitchen counter	A photo of a aloe vera on a kitchen counter with a plant label stuck in the pot	A photo of a aloe vera on a kitchen counter on the left side of the frame
A watercolor painting of a wolf howling on a hill near a graffiti wall	A watercolor painting of a white wolf howling on a hill near a graffiti wall	A watercolor painting of 3 wolves howling on a hill near a graffiti wall	A watercolor painting of a wolf howling on a hill near a graffiti wall with a frisbee nearby	A watercolor painting of a wolf howling on a hill near a graffiti wall on the right side of the frame
A digital art image of a horse walking along a beach with neon lights	A digital art image of a golden horse walking along a beach with neon lights	A digital art image of 2 horses walking along a beach with neon lights	A digital art image of a horse walking along a beach with neon lights with a frisbee nearby	A digital art image of a horse walking along a beach with neon lights on the right side of the frame
An illustration of a plant in a pot on a shelf with confetti on the ground	An illustration of a yellow plant in a pot on a shelf with confetti on the ground	An illustration of 3 plants in a pot on a shelf with confetti on the ground	An illustration of a plant in a pot on a shelf with confetti on the ground with a patterned cloth under it	An illustration of a plant in a pot on a shelf with confetti on the ground tilted slightly to the right
A 3D render of a hedgehog on a mossy log beside a lake	A 3D render of a golden hedgehog on a mossy log beside a lake	A 3D render of 2 hedgehogs on a mossy log beside a lake	A 3D render of a hedgehog on a mossy log beside a lake with a frisbee nearby	A 3D render of a hedgehog on a mossy log beside a lake on the left side of the frame
A 3D render of a canoe pulled onto a riverbank with dramatic shadows	A 3D render of a red canoe pulled onto a riverbank with dramatic shadows	A 3D render of 2 canoes pulled onto a riverbank with dramatic shadows	A 3D render of a canoe pulled onto a riverbank with dramatic shadows with luggage strapped on top	A 3D render of a canoe pulled onto a riverbank with dramatic shadows on top of a small pedestal
An illustration of a table on a patio with city skyline in background	An illustration of a blue table on a patio with city skyline in background	An illustration of 2 tables on a patio with city skyline in background	An illustration of a table on a patio with city skyline in background with a tiny key lying nearby	An illustration of a table on a patio with city skyline in background on the right side of the frame
A 3D render of a parrot on a wooden perch with fairy lights	A 3D render of a black parrot on a wooden perch with fairy lights	A 3D render of 2 parrots on a wooden perch with fairy lights	A 3D render of a parrot on a wooden perch with fairy lights with a small bell on its collar	A 3D render of a parrot on a wooden perch with fairy lights on the left side of the frame
A 3D render of a eagle flying over mountains beside a lake	A 3D render of a brown eagle flying over mountains beside a lake	A 3D render of 2 eagles flying over mountains beside a lake	A 3D render of a eagle flying over mountains beside a lake with a small bell on its collar	A 3D render of a eagle flying over mountains beside a lake lying down instead
A photo of a teapot on a stove beside a fireplace	A photo of a teal teapot on a stove beside a fireplace	A photo of 3 teapots on a stove beside a fireplace	A photo of a teapot on a stove beside a fireplace with a tiny key lying nearby	A photo of a teapot on a stove beside a fireplace tilted slightly to the left
A photo of a rollerblade on a smooth path	A photo of a blue rollerblade on a smooth path	A photo of 3 rollerblades on a smooth path	A photo of a rollerblade on a smooth path with a bicycle mounted on the back	A photo of a rollerblade on a smooth path in the background
A watercolor painting of a runner in a park at dusk	A watercolor painting of a runner in a park at dusk wearing a yellow jacket	A watercolor painting of 2 runners in a park at dusk	A watercolor painting of a runner in a park at dusk holding a blue umbrella	A watercolor painting of a runner in a park at dusk on the right side of the frame
A digital art image of a airplane on a runway with autumn colors	A digital art image of a blue airplane on a runway with autumn colors	A digital art image of 3 airplanes on a runway with autumn colors	A digital art image of a airplane on a runway with autumn colors with headlights turned on	A digital art image of a airplane on a runway with autumn colors on top of a small pedestal
An illustration of a minivan in a suburban driveway under soft sunlight	An illustration of a green minivan in a suburban driveway under soft sunlight	An illustration of 3 minivans in a suburban driveway under soft sunlight	An illustration of a minivan in a suburban driveway under soft sunlight with a roof rack and a surfboard	An illustration of a minivan in a suburban driveway under soft sunlight under a hanging lamp
An illustration of a pagoda in a garden beside a fireplace	An illustration of a blue pagoda in a garden beside a fireplace	An illustration of 2 pagodas in a garden beside a fireplace	An illustration of a pagoda in a garden beside a fireplace with a street sign nearby	An illustration of a pagoda in a garden beside a fireplace on the right side of the frame
A photo of a barn in a meadow	A photo of a blue barn in a meadow	A photo of 3 barns in a meadow	A photo of a barn in a meadow with a street sign nearby	A photo of a barn in a meadow on the right side of the frame
A watercolor painting of a sailboat on calm water with spring flowers	A watercolor painting of a black sailboat on calm water with spring flowers	A watercolor painting of 2 sailboats on calm water with spring flowers	A watercolor painting of a sailboat on calm water with spring flowers with a roof rack and a surfboard	A watercolor painting of a sailboat on calm water with spring flowers on the right side of the frame
A digital art image of a elephant walking in a grassy field with dramatic shadows	A digital art image of a gray elephant walking in a grassy field with dramatic shadows	A digital art image of 3 elephants walking in a grassy field with dramatic shadows	A digital art image of a elephant walking in a grassy field with dramatic shadows next to a green ball	A digital art image of a elephant walking in a grassy field with dramatic shadows on the left side of the frame
A digital art image of a motorcycle on a mountain pass under soft sunlight	A digital art image of a yellow motorcycle on a mountain pass under soft sunlight	A digital art image of 3 motorcycles on a mountain pass under soft sunlight	A digital art image of a motorcycle on a mountain pass under soft sunlight with a bicycle mounted on the back	A digital art image of a motorcycle on a mountain pass under soft sunlight tilted slightly to the left
A 3D render of a tram on a cobblestone street next to a bookshelf	A 3D render of a red tram on a cobblestone street next to a bookshelf	A 3D render of 2 trams on a cobblestone street next to a bookshelf	A 3D render of a tram on a cobblestone street next to a bookshelf with a bicycle mounted on the back	A 3D render of a tram on a cobblestone street next to a bookshelf in the background
An illustration of a candle on a table runner near a brick wall	An illustration of a orange candle on a table runner near a brick wall	An illustration of 2 candles on a table runner near a brick wall	An illustration of a candle on a table runner near a brick wall with a patterned cloth under it	An illustration of a candle on a table runner near a brick wall on the left side of the frame
A watercolor painting of a vr headset on a table on a rainy day	A watercolor painting of a blue vr headset on a table on a rainy day	A watercolor painting of 2 vr headsets on a table on a rainy day	A watercolor painting of a vr headset on a table on a rainy day with a star sticker on it	A watercolor painting of a vr headset on a table on a rainy day on the left side of the frame
A digital art image of a rose bush by a picket fence	A digital art image of a rose bush by a picket fence in a white pot	A digital art image of 2 rose bushes by a picket fence	A digital art image of a rose bush by a picket fence with a tiny garden gnome beside it	A digital art image of a rose bush by a picket fence in the background
An illustration of a deer in a forest clearing beside a garden path	An illustration of a gray deer in a forest clearing beside a garden path	An illustration of 3 deer in a forest clearing beside a garden path	An illustration of a deer in a forest clearing beside a garden path next to a green ball	An illustration of a deer in a forest clearing beside a garden path sitting instead
A photo of a tram on a cobblestone street	A photo of a yellow tram on a cobblestone street	A photo of 2 trams on a cobblestone street	A photo of a tram on a cobblestone street with headlights turned on	A photo of a tram on a cobblestone street on the left side of the frame
A digital art image of a basket on a market stall under a pergola	A digital art image of a black basket on a market stall under a pergola	A digital art image of 2 baskets on a market stall under a pergola	A digital art image of a basket on a market stall under a pergola with a star sticker on it	A digital art image of a basket on a market stall under a pergola on the left side of the frame
An illustration of a scooter parked near a cafe under a pergola	An illustration of a blue scooter parked near a cafe under a pergola	An illustration of 2 scooters parked near a cafe under a pergola	An illustration of a scooter parked near a cafe under a pergola with headlights turned on	An illustration of a scooter parked near a cafe under a pergola tilted slightly to the right
A digital art image of a canoe pulled onto a riverbank at dawn	A digital art image of a silver canoe pulled onto a riverbank at dawn	A digital art image of 3 canoes pulled onto a riverbank at dawn	A digital art image of a canoe pulled onto a riverbank at dawn with luggage strapped on top	A digital art image of a canoe pulled onto a riverbank at dawn under a hanging lamp
A watercolor painting of a writer at a cafe table with confetti on the ground	A watercolor painting of a writer at a cafe table with confetti on the ground wearing a gray jacket	A watercolor painting of 2 writers at a cafe table with confetti on the ground	A watercolor painting of a writer at a cafe table with confetti on the ground holding a blue umbrella	A watercolor painting of a writer at a cafe table with confetti on the ground on the left side of the frame
An illustration of a hedgehog on a mossy log	An illustration of a white hedgehog on a mossy log	An illustration of 2 hedgehogs on a mossy log	An illustration of a hedgehog on a mossy log next to a green ball	An illustration of a hedgehog on a mossy log in the background
A 3D render of a chameleon on a green leaf with winter frost	A 3D render of a golden chameleon on a green leaf with winter frost	A 3D render of 3 chameleons on a green leaf with winter frost	A 3D render of a chameleon on a green leaf with winter frost with a small bell on its collar	A 3D render of a chameleon on a green leaf with winter frost in the background
A watercolor painting of a keyboard on a desk in harsh midday sun	A watercolor painting of a green keyboard on a desk in harsh midday sun	A watercolor painting of 2 keyboards on a desk in harsh midday sun	A watercolor painting of a keyboard on a desk in harsh midday sun with a small plant beside it	A watercolor painting of a keyboard on a desk in harsh midday sun centered in the frame
A digital art image of a dolphin leaping out of the ocean indoors with soft lighting	A digital art image of a golden dolphin leaping out of the ocean indoors with soft lighting	A digital art image of 2 dolphins leaping out of the ocean indoors with soft lighting	A digital art image of a dolphin leaping out of the ocean indoors with soft lighting with a frisbee nearby	A digital art image of a dolphin leaping out of the ocean indoors with soft lighting in the foreground
A digital art image of a parrot on a wooden perch	A digital art image of a gray parrot on a wooden perch	A digital art image of 2 parrots on a wooden perch	A digital art image of a parrot on a wooden perch with a small bell on its collar	A digital art image of a parrot on a wooden perch in the background
A watercolor painting of a bridge over a river with summer sunlight	A watercolor painting of a red bridge over a river with summer sunlight	A watercolor painting of 3 bridges over a river with summer sunlight	A watercolor painting of a bridge over a river with summer sunlight with a bench in front	A watercolor painting of a bridge over a river with summer sunlight with the main door on the right
A digital art image of a usb drive on a notepad on a rainy day	A digital art image of a silver usb drive on a notepad on a rainy day	A digital art image of 2 usb drives on a notepad on a rainy day	A digital art image of a usb drive on a notepad on a rainy day with headphones plugged in	A digital art image of a usb drive on a notepad on a rainy day on the left side of the frame
A 3D render of a microscope on a lab bench with mountains in the distance	A 3D render of a red microscope on a lab bench with mountains in the distance	A 3D render of 2 microscopes on a lab bench with mountains in the distance	A 3D render of a microscope on a lab bench with mountains in the distance with a patterned cloth under it	A 3D render of a microscope on a lab bench with mountains in the distance on top of a small pedestal
A watercolor painting of a elephant walking in a grassy field under overcast skies	A watercolor painting of a white elephant walking in a grassy field under overcast skies	A watercolor painting of 2 elephants walking in a grassy field under overcast skies	A watercolor painting of a elephant walking in a grassy field under overcast skies next to a green ball	A watercolor painting of a elephant walking in a grassy field under overcast skies on the right side of the frame
An illustration of a suitcase on a platform	An illustration of a teal suitcase on a platform	An illustration of 3 suitcases on a platform	An illustration of a suitcase on a platform with a star sticker on it	An illustration of a suitcase on a platform tilted slightly to the left
A photo of a house on a quiet street with fairy lights	A photo of a yellow house on a quiet street with fairy lights	A photo of 2 houses on a quiet street with fairy lights	A photo of a house on a quiet street with fairy lights with a bench in front	A photo of a house on a quiet street with fairy lights in the foreground
A 3D render of a tractor in a field near a street lamp	A 3D render of a white tractor in a field near a street lamp	A 3D render of 3 tractors in a field near a street lamp	A 3D render of a tractor in a field near a street lamp with a bicycle mounted on the back	A 3D render of a tractor in a field near a street lamp on top of a small pedestal
A watercolor painting of a photographer on a city street on a balcony	A watercolor painting of a photographer on a city street on a balcony wearing a green jacket	A watercolor painting of 2 photographers on a city street on a balcony	A watercolor painting of a photographer on a city street on a balcony holding a blue umbrella	A watercolor painting of a photographer on a city street on a balcony on the left side of the frame
A digital art image of a runner in a park with spring flowers	A digital art image of a runner in a park with spring flowers wearing a green jacket	A digital art image of 3 runners in a park with spring flowers	A digital art image of a runner in a park with spring flowers holding a blue umbrella	A digital art image of a runner in a park with spring flowers centered in the frame
An illustration of a snowboard on packed snow with autumn colors	An illustration of a yellow snowboard on packed snow with autumn colors	An illustration of 2 snowboards on packed snow with autumn colors	An illustration of a snowboard on packed snow with autumn colors with a sports bag beside it	An illustration of a snowboard on packed snow with autumn colors centered in the frame
A digital art image of a keyboard on a desk near a graffiti wall	A digital art image of a yellow keyboard on a desk near a graffiti wall	A digital art image of 2 keyboards on a desk near a graffiti wall	A digital art image of a keyboard on a desk near a graffiti wall with a patterned cloth under it	A digital art image of a keyboard on a desk near a graffiti wall tilted slightly to the left
A photo of a owl perched on a branch with mountains in the distance	A photo of a gray owl perched on a branch with mountains in the distance	A photo of 2 owls perched on a branch with mountains in the distance	A photo of a owl perched on a branch with mountains in the distance with a small bell on its collar	A photo of a owl perched on a branch with mountains in the distance sitting instead
A digital art image of a helmet on a shelf by the seaside	A digital art image of a gray helmet on a shelf by the seaside	A digital art image of 3 helmets on a shelf by the seaside	A digital art image of a helmet on a shelf by the seaside with a star sticker on it	A digital art image of a helmet on a shelf by the seaside on the right side of the frame
A watercolor painting of a teapot on a stove with cotton-candy clouds	A watercolor painting of a purple teapot on a stove with cotton-candy clouds	A watercolor painting of 3 teapots on a stove with cotton-candy clouds	A watercolor painting of a teapot on a stove with cotton-candy clouds with a folded note next to it	A watercolor painting of a teapot on a stove with cotton-candy clouds on the left side of the frame
A watercolor painting of a barista behind a counter	A watercolor painting of a barista behind a counter wearing a orange jacket	A watercolor painting of 2 baristas behind a counter	A watercolor painting of a barista behind a counter carrying a backpack	A watercolor painting of a barista behind a counter jumping mid-air
A watercolor painting of a sailboat on calm water at dusk	A watercolor painting of a red sailboat on calm water at dusk	A watercolor painting of 2 sailboats on calm water at dusk	A watercolor painting of a sailboat on calm water at dusk with a roof rack and a surfboard	A watercolor painting of a sailboat on calm water at dusk on top of a small pedestal
A 3D render of a peacock in a courtyard with city skyline in background	A 3D render of a brown peacock in a courtyard with city skyline in background	A 3D render of 2 peacocks in a courtyard with city skyline in background	A 3D render of a peacock in a courtyard with city skyline in background next to a green ball	A 3D render of a peacock in a courtyard with city skyline in background curling up
A watercolor painting of a bus at a city stop indoors with a skylight	A watercolor painting of a white bus at a city stop indoors with a skylight	A watercolor painting of 2 buses at a city stop indoors with a skylight	A watercolor painting of a bus at a city stop indoors with a skylight with a roof rack and a surfboard	A watercolor painting of a bus at a city stop indoors with a skylight centered in the frame
An illustration of a telescope by a balcony rail with paper lanterns	An illustration of a gray telescope by a balcony rail with paper lanterns	An illustration of 3 telescopes by a balcony rail with paper lanterns	An illustration of a telescope by a balcony rail with paper lanterns with a star sticker on it	An illustration of a telescope by a balcony rail with paper lanterns tilted slightly to the right
A watercolor painting of a candle on a table runner	A watercolor painting of a gray candle on a table runner	A watercolor painting of 2 candles on a table runner	A watercolor painting of a candle on a table runner with a folded note next to it	A watercolor painting of a candle on a table runner centered in the frame
A 3D render of a usb drive on a notepad	A 3D render of a silver usb drive on a notepad	A 3D render of 3 usb drives on a notepad	A 3D render of a usb drive on a notepad with a charging cable attached	A 3D render of a usb drive on a notepad on top of a small pedestal
An illustration of a construction worker at a building site with string lights overhead	An illustration of a construction worker at a building site with string lights overhead wearing a red jacket	An illustration of 2 construction workers at a building site with string lights overhead	An illustration of a construction worker at a building site with string lights overhead wearing red headphones	An illustration of a construction worker at a building site with string lights overhead centered in the frame
A digital art image of a dancer on a stage	A digital art image of a dancer on a stage wearing a red jacket	A digital art image of 3 dancers on a stage	A digital art image of a dancer on a stage wearing red headphones	A digital art image of a dancer on a stage lying down instead
A watercolor painting of a eagle flying over mountains	A watercolor painting of a gray eagle flying over mountains	A watercolor painting of 2 eagles flying over mountains	A watercolor painting of a eagle flying over mountains wearing blue glasses	A watercolor painting of a eagle flying over mountains centered in the frame
A 3D render of a drone on a workbench with cherry blossoms	A 3D render of a yellow drone on a workbench with cherry blossoms	A 3D render of 3 drones on a workbench with cherry blossoms	A 3D render of a drone on a workbench with cherry blossoms with a patterned cloth under it	A 3D render of a drone on a workbench with cherry blossoms tilted slightly to the right
A photo of a dolphin leaping out of the ocean with reflections on wet ground	A photo of a gray dolphin leaping out of the ocean with reflections on wet ground	A photo of 2 dolphins leaping out of the ocean with reflections on wet ground	A photo of a dolphin leaping out of the ocean with reflections on wet ground with a small bell on its collar	A photo of a dolphin leaping out of the ocean with reflections on wet ground curling up
A watercolor painting of a tiger in tall grass on polished concrete	A watercolor painting of a black tiger in tall grass on polished concrete	A watercolor painting of 2 tigers in tall grass on polished concrete	A watercolor painting of a tiger in tall grass on polished concrete with a small bell on its collar	A watercolor painting of a tiger in tall grass on polished concrete on the right side of the frame
A photo of a golf bag beside a green on a cloudy day	A photo of a red golf bag beside a green on a cloudy day	A photo of 2 golf bags beside a green on a cloudy day	A photo of a golf bag beside a green on a cloudy day with a pump next to it	A photo of a golf bag beside a green on a cloudy day on the right side of the frame
A photo of a truck on a dirt road with winter frost	A photo of a silver truck on a dirt road with winter frost	A photo of 3 trucks on a dirt road with winter frost	A photo of a truck on a dirt road with winter frost with headlights turned on	A photo of a truck on a dirt road with winter frost tilted slightly to the right
A photo of a golf bag beside a green	A photo of a blue golf bag beside a green	A photo of 2 golf bags beside a green	A photo of a golf bag beside a green with a green stripe added	A photo of a golf bag beside a green in the background
A digital art image of a dancer on a stage with summer sunlight	A digital art image of a dancer on a stage with summer sunlight wearing a orange jacket	A digital art image of 3 dancers on a stage with summer sunlight	A digital art image of a dancer on a stage with summer sunlight carrying a backpack	A digital art image of a dancer on a stage with summer sunlight sitting instead
A 3D render of a vase on a wooden table with misty mountains	A 3D render of a blue vase on a wooden table with misty mountains	A 3D render of 3 vases on a wooden table with misty mountains	A 3D render of a vase on a wooden table with misty mountains with a tiny key lying nearby	A 3D render of a vase on a wooden table with misty mountains centered in the frame
A photo of a painting on an easel on a balcony	A photo of a red painting on an easel on a balcony	A photo of 3 paintings on an easel on a balcony	A photo of a painting on an easel on a balcony with a patterned cloth under it	A photo of a painting on an easel on a balcony tilted slightly to the left
A 3D render of a lamp on a nightstand on a patterned rug	A 3D render of a red lamp on a nightstand on a patterned rug	A 3D render of 2 lamps on a nightstand on a patterned rug	A 3D render of a lamp on a nightstand on a patterned rug with a folded note next to it	A 3D render of a lamp on a nightstand on a patterned rug on top of a small pedestal
A 3D render of a vr headset on a table	A 3D render of a green vr headset on a table	A 3D render of 3 vr headsets on a table	A 3D render of a vr headset on a table with a tiny key lying nearby	A 3D render of a vr headset on a table tilted slightly to the right
A 3D render of a helmet on a shelf	A 3D render of a yellow helmet on a shelf	A 3D render of 2 helmets on a shelf	A 3D render of a helmet on a shelf with a tiny key lying nearby	A 3D render of a helmet on a shelf tilted slightly to the right
An illustration of a surfboard on a beach with gentle fog	An illustration of a black surfboard on a beach with gentle fog	An illustration of 3 surfboards on a beach with gentle fog	An illustration of a surfboard on a beach with gentle fog with a pump next to it	An illustration of a surfboard on a beach with gentle fog tilted slightly to the right
A digital art image of a hedgehog on a mossy log with confetti on the ground	A digital art image of a white hedgehog on a mossy log with confetti on the ground	A digital art image of 3 hedgehogs on a mossy log with confetti on the ground	A digital art image of a hedgehog on a mossy log with confetti on the ground wearing blue glasses	A digital art image of a hedgehog on a mossy log with confetti on the ground in the foreground
A watercolor painting of a chameleon on a green leaf by the seaside	A watercolor painting of a gray chameleon on a green leaf by the seaside	A watercolor painting of 3 chameleons on a green leaf by the seaside	A watercolor painting of a chameleon on a green leaf by the seaside with a frisbee nearby	A watercolor painting of a chameleon on a green leaf by the seaside jumping mid-air
A watercolor painting of a tablet on a couch under a pergola	A watercolor painting of a silver tablet on a couch under a pergola	A watercolor painting of 3 tablets on a couch under a pergola	A watercolor painting of a tablet on a couch under a pergola with a protective case on	A watercolor painting of a tablet on a couch under a pergola on the right side of the frame
A watercolor painting of a photographer on a city street beside a tree	A watercolor painting of a photographer on a city street beside a tree wearing a purple jacket	A watercolor painting of 2 photographers on a city street beside a tree	A watercolor painting of a photographer on a city street beside a tree wearing red headphones	A watercolor painting of a photographer on a city street beside a tree sitting instead
A watercolor painting of a giraffe next to a tall tree indoors with soft lighting	A watercolor painting of a golden giraffe next to a tall tree indoors with soft lighting	A watercolor painting of 2 girafves next to a tall tree indoors with soft lighting	A watercolor painting of a giraffe next to a tall tree indoors with soft lighting wearing blue glasses	A watercolor painting of a giraffe next to a tall tree indoors with soft lighting on the left side of the frame
An illustration of a gardener in a backyard with misty mountains	An illustration of a gardener in a backyard with misty mountains wearing a orange jacket	An illustration of 3 gardeners in a backyard with misty mountains	An illustration of a gardener in a backyard with misty mountains wearing red headphones	An illustration of a gardener in a backyard with misty mountains in the background
A digital art image of a runner in a park	A digital art image of a runner in a park wearing a yellow jacket	A digital art image of 3 runners in a park	A digital art image of a runner in a park wearing a straw hat	A digital art image of a runner in a park kneeling
An illustration of a bicycle leaning against a brick wall with a city bus passing by	An illustration of a silver bicycle leaning against a brick wall with a city bus passing by	An illustration of 2 bicycles leaning against a brick wall with a city bus passing by	An illustration of a bicycle leaning against a brick wall with a city bus passing by with a small flag on the antenna	An illustration of a bicycle leaning against a brick wall with a city bus passing by under a hanging lamp
A digital art image of a soccer ball on a grassy field near a street market	A digital art image of a white soccer ball on a grassy field near a street market	A digital art image of 3 soccer balls on a grassy field near a street market	A digital art image of a soccer ball on a grassy field near a street market with a sports bag beside it	A digital art image of a soccer ball on a grassy field near a street market centered in the frame
An illustration of a fisher on a wooden pier	An illustration of a fisher on a wooden pier wearing a white jacket	An illustration of 2 fishers on a wooden pier	An illustration of a fisher on a wooden pier wearing a straw hat	An illustration of a fisher on a wooden pier in the background
A watercolor painting of a surfboard on a beach	A watercolor painting of a black surfboard on a beach	A watercolor painting of 2 surfboards on a beach	A watercolor painting of a surfboard on a beach with a sports bag beside it	A watercolor painting of a surfboard on a beach in the background
A digital art image of a yogi on a yoga mat under overcast skies	A digital art image of a yogi on a yoga mat under overcast skies wearing a yellow jacket	A digital art image of 2 yogis on a yoga mat under overcast skies	A digital art image of a yogi on a yoga mat under overcast skies carrying a backpack	A digital art image of a yogi on a yoga mat under overcast skies in the foreground
A digital art image of a table on a patio	A digital art image of a teal table on a patio	A digital art image of 2 tables on a patio	A digital art image of a table on a patio with a folded note next to it	A digital art image of a table on a patio in the foreground
A digital art image of a car parked on a coastal road near a graffiti wall	A digital art image of a orange car parked on a coastal road near a graffiti wall	A digital art image of 2 cars parked on a coastal road near a graffiti wall	A digital art image of a car parked on a coastal road near a graffiti wall with luggage strapped on top	A digital art image of a car parked on a coastal road near a graffiti wall centered in the frame
A 3D render of a castle on a hill on a balcony	A 3D render of a green castle on a hill on a balcony	A 3D render of 2 castles on a hill on a balcony	A 3D render of a castle on a hill on a balcony with a small flag above the door	A 3D render of a castle on a hill on a balcony on the left side of the frame
A photo of a airplane on a runway at dawn	A photo of a yellow airplane on a runway at dawn	A photo of 2 airplanes on a runway at dawn	A photo of a airplane on a runway at dawn with a bicycle mounted on the back	A photo of a airplane on a runway at dawn in the foreground
A photo of a camera on a tripod with dramatic shadows	A photo of a green camera on a tripod with dramatic shadows	A photo of 3 cameras on a tripod with dramatic shadows	A photo of a camera on a tripod with dramatic shadows with a patterned cloth under it	A photo of a camera on a tripod with dramatic shadows centered in the frame
A photo of a squirrel on a wooden fence	A photo of a golden squirrel on a wooden fence	A photo of 2 squirrels on a wooden fence	A photo of a squirrel on a wooden fence next to a green ball	A photo of a squirrel on a wooden fence in the foreground
A photo of a cricket bat on short grass	A photo of a blue cricket bat on short grass	A photo of 2 cricket bats on short grass	A photo of a cricket bat on short grass with a pump next to it	A photo of a cricket bat on short grass in the background
An illustration of a owl perched on a branch near a fountain	An illustration of a gray owl perched on a branch near a fountain	An illustration of 2 owls perched on a branch near a fountain	An illustration of a owl perched on a branch near a fountain next to a green ball	An illustration of a owl perched on a branch near a fountain sitting instead
A watercolor painting of a buffalo in a prairie	A watercolor painting of a black buffalo in a prairie	A watercolor painting of 3 buffalos in a prairie	A watercolor painting of a buffalo in a prairie with a small bell on its collar	A watercolor painting of a buffalo in a prairie lying down instead
A watercolor painting of a teacher in a classroom	A watercolor painting of a teacher in a classroom wearing a teal jacket	A watercolor painting of 2 teachers in a classroom	A watercolor painting of a teacher in a classroom wearing red headphones	A watercolor painting of a teacher in a classroom centered in the frame
An illustration of a deer in a forest clearing in golden hour light	An illustration of a white deer in a forest clearing in golden hour light	An illustration of 3 deer in a forest clearing in golden hour light	An illustration of a deer in a forest clearing in golden hour light with a frisbee nearby	An illustration of a deer in a forest clearing in golden hour light curling up
An illustration of a truck on a dirt road	An illustration of a yellow truck on a dirt road	An illustration of 2 trucks on a dirt road	An illustration of a truck on a dirt road with a small flag on the antenna	An illustration of a truck on a dirt road centered in the frame
An illustration of a chameleon on a green leaf	An illustration of a gray chameleon on a green leaf	An illustration of 2 chameleons on a green leaf	An illustration of a chameleon on a green leaf wearing a red bandana	An illustration of a chameleon on a green leaf in the background
An illustration of a table on a patio near a street lamp	An illustration of a red table on a patio near a street lamp	An illustration of 3 tables on a patio near a street lamp	An illustration of a table on a patio near a street lamp with a patterned cloth under it	An illustration of a table on a patio near a street lamp in the foreground
A digital art image of a truck on a dirt road with light shadows	A digital art image of a yellow truck on a dirt road with light shadows	A digital art image of 3 trucks on a dirt road with light shadows	A digital art image of a truck on a dirt road with light shadows with a roof rack and a surfboard	A digital art image of a truck on a dirt road with light shadows in the background
A 3D render of a panda sitting with bamboo nearby with light shadows	A 3D render of a golden panda sitting with bamboo nearby with light shadows	A 3D render of 3 pandas sitting with bamboo nearby with light shadows	A 3D render of a panda sitting with bamboo nearby with light shadows with a small bell on its collar	A 3D render of a panda sitting with bamboo nearby with light shadows in the foreground
An illustration of a tractor in a field near a brick wall	An illustration of a yellow tractor in a field near a brick wall	An illustration of 2 tractors in a field near a brick wall	An illustration of a tractor in a field near a brick wall with a roof rack and a surfboard	An illustration of a tractor in a field near a brick wall on the right side of the frame
A watercolor painting of a printer on a shelf near a street market	A watercolor painting of a silver printer on a shelf near a street market	A watercolor painting of 3 printers on a shelf near a street market	A watercolor painting of a printer on a shelf near a street market with a charging cable attached	A watercolor painting of a printer on a shelf near a street market centered in the frame
A watercolor painting of a castle on a hill on a patterned rug	A watercolor painting of a red castle on a hill on a patterned rug	A watercolor painting of 2 castles on a hill on a patterned rug	A watercolor painting of a castle on a hill on a patterned rug with a street sign nearby	A watercolor painting of a castle on a hill on a patterned rug in the background
A 3D render of a golf bag beside a green with summer sunlight	A 3D render of a white golf bag beside a green with summer sunlight	A 3D render of 3 golf bags beside a green with summer sunlight	A 3D render of a golf bag beside a green with summer sunlight with a green stripe added	A 3D render of a golf bag beside a green with summer sunlight centered in the frame
A 3D render of a surfboard on a beach with cherry blossoms	A 3D render of a red surfboard on a beach with cherry blossoms	A 3D render of 2 surfboards on a beach with cherry blossoms	A 3D render of a surfboard on a beach with cherry blossoms with a sports bag beside it	A 3D render of a surfboard on a beach with cherry blossoms tilted slightly to the right
A 3D render of a peacock in a courtyard	A 3D render of a black peacock in a courtyard	A 3D render of 3 peacocks in a courtyard	A 3D render of a peacock in a courtyard with a frisbee nearby	A 3D render of a peacock in a courtyard sitting instead
A 3D render of a flamingo in a lagoon	A 3D render of a black flamingo in a lagoon	A 3D render of 2 flamingos in a lagoon	A 3D render of a flamingo in a lagoon with a small bell on its collar	A 3D render of a flamingo in a lagoon in the background
A 3D render of a plant in a pot on a shelf beside a lake	A 3D render of a teal plant in a pot on a shelf beside a lake	A 3D render of 2 plants in a pot on a shelf beside a lake	A 3D render of a plant in a pot on a shelf beside a lake with a small plant beside it	A 3D render of a plant in a pot on a shelf beside a lake on the left side of the frame
A 3D render of a swan on a lake with misty mountains	A 3D render of a brown swan on a lake with misty mountains	A 3D render of 3 swans on a lake with misty mountains	A 3D render of a swan on a lake with misty mountains with a frisbee nearby	A 3D render of a swan on a lake with misty mountains lying down instead
An illustration of a bridge over a river with confetti on the ground	An illustration of a blue bridge over a river with confetti on the ground	An illustration of 2 bridges over a river with confetti on the ground	An illustration of a bridge over a river with confetti on the ground with a bicycle leaning against it	An illustration of a bridge over a river with confetti on the ground with the main door on the left
A 3D render of a camera on a tripod	A 3D render of a yellow camera on a tripod	A 3D render of 3 cameras on a tripod	A 3D render of a camera on a tripod with a star sticker on it	A 3D render of a camera on a tripod tilted slightly to the left
An illustration of a monkey hanging from a vine with dramatic shadows	An illustration of a gray monkey hanging from a vine with dramatic shadows	An illustration of 3 monkeys hanging from a vine with dramatic shadows	An illustration of a monkey hanging from a vine with dramatic shadows with a frisbee nearby	An illustration of a monkey hanging from a vine with dramatic shadows centered in the frame
A 3D render of a painter in a studio	A 3D render of a painter in a studio wearing a teal jacket	A 3D render of 3 painters in a studio	A 3D render of a painter in a studio holding a coffee cup	A 3D render of a painter in a studio kneeling
A watercolor painting of a camera on a tripod under overcast skies	A watercolor painting of a gray camera on a tripod under overcast skies	A watercolor painting of 2 cameras on a tripod under overcast skies	A watercolor painting of a camera on a tripod under overcast skies with a star sticker on it	A watercolor painting of a camera on a tripod under overcast skies tilted slightly to the right
An illustration of a koala clinging to a tree with misty mountains	An illustration of a golden koala clinging to a tree with misty mountains	An illustration of 2 koalas clinging to a tree with misty mountains	An illustration of a koala clinging to a tree with misty mountains wearing blue glasses	An illustration of a koala clinging to a tree with misty mountains sitting instead
A watercolor painting of a earbuds in a charging case at dawn	A watercolor painting of a silver earbuds in a charging case at dawn	A watercolor painting of 2 earbudses in a charging case at dawn	A watercolor painting of a earbuds in a charging case at dawn with a stylus next to it	A watercolor painting of a earbuds in a charging case at dawn on top of a small pedestal
A watercolor painting of a painter in a studio with mountains in the distance	A watercolor painting of a painter in a studio with mountains in the distance wearing a gray jacket	A watercolor painting of 2 painters in a studio with mountains in the distance	A watercolor painting of a painter in a studio with mountains in the distance wearing a straw hat	A watercolor painting of a painter in a studio with mountains in the distance on the left side of the frame
A 3D render of a kayak near a lake shore with cotton-candy clouds	A 3D render of a green kayak near a lake shore with cotton-candy clouds	A 3D render of 3 kayaks near a lake shore with cotton-candy clouds	A 3D render of a kayak near a lake shore with cotton-candy clouds with luggage strapped on top	A 3D render of a kayak near a lake shore with cotton-candy clouds tilted slightly to the right
An illustration of a yogi on a yoga mat with dramatic shadows	An illustration of a yogi on a yoga mat with dramatic shadows wearing a gray jacket	An illustration of 2 yogis on a yoga mat with dramatic shadows	An illustration of a yogi on a yoga mat with dramatic shadows wearing a straw hat	An illustration of a yogi on a yoga mat with dramatic shadows kneeling
An illustration of a gardener in a backyard	An illustration of a gardener in a backyard wearing a green jacket	An illustration of 3 gardeners in a backyard	An illustration of a gardener in a backyard holding a coffee cup	An illustration of a gardener in a backyard kneeling
A watercolor painting of a game controller on a sofa with desert dunes behind	A watercolor painting of a red game controller on a sofa with desert dunes behind	A watercolor painting of 3 game controllers on a sofa with desert dunes behind	A watercolor painting of a game controller on a sofa with desert dunes behind with a tiny key lying nearby	A watercolor painting of a game controller on a sofa with desert dunes behind under a hanging lamp
A 3D render of a sports car inside a garage with a mountain lake behind	A 3D render of a white sports car inside a garage with a mountain lake behind	A 3D render of 2 sports cars inside a garage with a mountain lake behind	A 3D render of a sports car inside a garage with a mountain lake behind with a roof rack and a surfboard	A 3D render of a sports car inside a garage with a mountain lake behind in the foreground
A watercolor painting of a swimmer beside a pool in harsh midday sun	A watercolor painting of a swimmer beside a pool in harsh midday sun wearing a gray jacket	A watercolor painting of 3 swimmers beside a pool in harsh midday sun	A watercolor painting of a swimmer beside a pool in harsh midday sun holding a blue umbrella	A watercolor painting of a swimmer beside a pool in harsh midday sun sitting instead
An illustration of a microphone on a boom arm with fallen leaves around	An illustration of a blue microphone on a boom arm with fallen leaves around	An illustration of 3 microphones on a boom arm with fallen leaves around	An illustration of a microphone on a boom arm with fallen leaves around with a stylus next to it	An illustration of a microphone on a boom arm with fallen leaves around tilted slightly to the left
A watercolor painting of a succulent in a small pot	A watercolor painting of a succulent in a small pot in a black pot	A watercolor painting of 2 succulents in a small pot	A watercolor painting of a succulent in a small pot with a small watering can next to it	A watercolor painting of a succulent in a small pot on the right side of the frame
An illustration of a monkey hanging from a vine under overcast skies	An illustration of a gray monkey hanging from a vine under overcast skies	An illustration of 3 monkeys hanging from a vine under overcast skies	An illustration of a monkey hanging from a vine under overcast skies wearing blue glasses	An illustration of a monkey hanging from a vine under overcast skies on the right side of the frame
A digital art image of a suitcase on a platform indoors with a skylight	A digital art image of a purple suitcase on a platform indoors with a skylight	A digital art image of 2 suitcases on a platform indoors with a skylight	A digital art image of a suitcase on a platform indoors with a skylight with a tiny key lying nearby	A digital art image of a suitcase on a platform indoors with a skylight on top of a small pedestal
An illustration of a hiker on a rocky trail	An illustration of a hiker on a rocky trail wearing a yellow jacket	An illustration of 2 hikers on a rocky trail	An illustration of a hiker on a rocky trail holding a blue umbrella	An illustration of a hiker on a rocky trail on the right side of the frame
A photo of a camera lens on a cloth in light drizzle	A photo of a blue camera lens on a cloth in light drizzle	A photo of 3 camera lenses on a cloth in light drizzle	A photo of a camera lens on a cloth in light drizzle with a protective case on	A photo of a camera lens on a cloth in light drizzle in the foreground
A 3D render of a airplane on a runway with paper lanterns	A 3D render of a silver airplane on a runway with paper lanterns	A 3D render of 2 airplanes on a runway with paper lanterns	A 3D render of a airplane on a runway with paper lanterns with a small flag on the antenna	A 3D render of a airplane on a runway with paper lanterns in the foreground
An illustration of a sailboat on calm water	An illustration of a red sailboat on calm water	An illustration of 2 sailboats on calm water	An illustration of a sailboat on calm water with a bicycle mounted on the back	An illustration of a sailboat on calm water in the background
A watercolor painting of a giraffe next to a tall tree at dusk	A watercolor painting of a brown giraffe next to a tall tree at dusk	A watercolor painting of 2 girafves next to a tall tree at dusk	A watercolor painting of a giraffe next to a tall tree at dusk next to a green ball	A watercolor painting of a giraffe next to a tall tree at dusk lying down instead
A 3D render of a dancer on a stage on a cloudy day	A 3D render of a dancer on a stage on a cloudy day wearing a green jacket	A 3D render of 2 dancers on a stage on a cloudy day	A 3D render of a dancer on a stage on a cloudy day wearing a straw hat	A 3D render of a dancer on a stage on a cloudy day on the right side of the frame
A 3D render of a buffalo in a prairie on polished concrete	A 3D render of a white buffalo in a prairie on polished concrete	A 3D render of 3 buffalos in a prairie on polished concrete	A 3D render of a buffalo in a prairie on polished concrete wearing a red bandana	A 3D render of a buffalo in a prairie on polished concrete jumping mid-air
A photo of a boxing glove on a ring apron with winter frost	A photo of a yellow boxing glove on a ring apron with winter frost	A photo of 2 boxing gloves on a ring apron with winter frost	A photo of a boxing glove on a ring apron with winter frost with a water bottle nearby	A photo of a boxing glove on a ring apron with winter frost on the left side of the frame
A digital art image of a router on a cabinet	A digital art image of a blue router on a cabinet	A digital art image of 3 routers on a cabinet	A digital art image of a router on a cabinet with a charging cable attached	A digital art image of a router on a cabinet centered in the frame
An illustration of a bus at a city stop	An illustration of a black bus at a city stop	An illustration of 3 buses at a city stop	An illustration of a bus at a city stop with luggage strapped on top	An illustration of a bus at a city stop tilted slightly to the right
A digital art image of a orchid on a windowsill	A digital art image of a orchid on a windowsill in a yellow pot	A digital art image of 3 orchids on a windowsill	A digital art image of a orchid on a windowsill with pebbles on the soil	A digital art image of a orchid on a windowsill in the background
A 3D render of a snowboard on packed snow	A 3D render of a red snowboard on packed snow	A 3D render of 3 snowboards on packed snow	A 3D render of a snowboard on packed snow with a scorecard in view	A 3D render of a snowboard on packed snow in the background
A watercolor painting of a barn in a meadow with autumn colors	A watercolor painting of a red barn in a meadow with autumn colors	A watercolor painting of 3 barns in a meadow with autumn colors	A watercolor painting of a barn in a meadow with autumn colors with a bicycle leaning against it	A watercolor painting of a barn in a meadow with autumn colors in the foreground
A watercolor painting of a canoe pulled onto a riverbank with autumn colors	A watercolor painting of a blue canoe pulled onto a riverbank with autumn colors	A watercolor painting of 2 canoes pulled onto a riverbank with autumn colors	A watercolor painting of a canoe pulled onto a riverbank with autumn colors with luggage strapped on top	A watercolor painting of a canoe pulled onto a riverbank with autumn colors under a hanging lamp
A photo of a swimmer beside a pool with gentle fog	A photo of a swimmer beside a pool with gentle fog wearing a gray jacket	A photo of 3 swimmers beside a pool with gentle fog	A photo of a swimmer beside a pool with gentle fog holding a coffee cup	A photo of a swimmer beside a pool with gentle fog jumping mid-air
An illustration of a parrot on a wooden perch with cherry blossoms	An illustration of a white parrot on a wooden perch with cherry blossoms	An illustration of 3 parrots on a wooden perch with cherry blossoms	An illustration of a parrot on a wooden perch with cherry blossoms wearing a red bandana	An illustration of a parrot on a wooden perch with cherry blossoms in the foreground
An illustration of a teapot on a stove	An illustration of a green teapot on a stove	An illustration of 2 teapots on a stove	An illustration of a teapot on a stove with a folded note next to it	An illustration of a teapot on a stove in the foreground
A watercolor painting of a aloe vera on a kitchen counter with misty mountains	A watercolor painting of a aloe vera on a kitchen counter with misty mountains in a white pot	A watercolor painting of 3 aloe veras on a kitchen counter with misty mountains	A watercolor painting of a aloe vera on a kitchen counter with misty mountains with a tiny garden gnome beside it	A watercolor painting of a aloe vera on a kitchen counter with misty mountains with the main door on the left
An illustration of a deer in a forest clearing near a brick wall	An illustration of a black deer in a forest clearing near a brick wall	An illustration of 2 deer in a forest clearing near a brick wall	An illustration of a deer in a forest clearing near a brick wall next to a green ball	An illustration of a deer in a forest clearing near a brick wall in the foreground
An illustration of a guitar on a stand indoors with soft lighting	An illustration of a yellow guitar on a stand indoors with soft lighting	An illustration of 2 guitars on a stand indoors with soft lighting	An illustration of a guitar on a stand indoors with soft lighting with a patterned cloth under it	An illustration of a guitar on a stand indoors with soft lighting on top of a small pedestal
A 3D render of a tablet on a couch	A 3D render of a white tablet on a couch	A 3D render of 3 tablets on a couch	A 3D render of a tablet on a couch with a stylus next to it	A 3D render of a tablet on a couch tilted slightly to the left
A photo of a yogi on a yoga mat	A photo of a yogi on a yoga mat wearing a pink jacket	A photo of 3 yogis on a yoga mat	A photo of a yogi on a yoga mat holding a coffee cup	A photo of a yogi on a yoga mat centered in the frame
A digital art image of a basket on a market stall	A digital art image of a orange basket on a market stall	A digital art image of 2 baskets on a market stall	A digital art image of a basket on a market stall with a folded note next to it	A digital art image of a basket on a market stall in the foreground
A 3D render of a book on a desk near a brick wall	A 3D render of a pink book on a desk near a brick wall	A 3D render of 2 books on a desk near a brick wall	A 3D render of a book on a desk near a brick wall with a star sticker on it	A 3D render of a book on a desk near a brick wall under a hanging lamp
A 3D render of a rabbit in a garden path next to a window	A 3D render of a gray rabbit in a garden path next to a window	A 3D render of 2 rabbits in a garden path next to a window	A 3D render of a rabbit in a garden path next to a window wearing a red bandana	A 3D render of a rabbit in a garden path next to a window jumping mid-air
A photo of a boxing glove on a ring apron	A photo of a green boxing glove on a ring apron	A photo of 2 boxing gloves on a ring apron	A photo of a boxing glove on a ring apron with a sports bag beside it	A photo of a boxing glove on a ring apron on the right side of the frame
An illustration of a house on a quiet street with cherry blossoms	An illustration of a gray house on a quiet street with cherry blossoms	An illustration of 2 houses on a quiet street with cherry blossoms	An illustration of a house on a quiet street with cherry blossoms with a bicycle leaning against it	An illustration of a house on a quiet street with cherry blossoms centered in the frame
An illustration of a lavender in a terracotta pot with city skyline in background	An illustration of a lavender in a terracotta pot with city skyline in background in a terracotta pot	An illustration of 2 lavenders in a terracotta pot with city skyline in background	An illustration of a lavender in a terracotta pot with city skyline in background with pebbles on the soil	An illustration of a lavender in a terracotta pot with city skyline in background with the main door on the right
An illustration of a fisher on a wooden pier on a wooden floor	An illustration of a fisher on a wooden pier on a wooden floor wearing a purple jacket	An illustration of 2 fishers on a wooden pier on a wooden floor	An illustration of a fisher on a wooden pier on a wooden floor holding a blue umbrella	An illustration of a fisher on a wooden pier on a wooden floor on the right side of the frame
A digital art image of a swimmer beside a pool	A digital art image of a swimmer beside a pool wearing a yellow jacket	A digital art image of 3 swimmers beside a pool	A digital art image of a swimmer beside a pool carrying a backpack	A digital art image of a swimmer beside a pool kneeling
An illustration of a coffee mug on a saucer next to a bookshelf	An illustration of a green coffee mug on a saucer next to a bookshelf	An illustration of 3 coffee mugs on a saucer next to a bookshelf	An illustration of a coffee mug on a saucer next to a bookshelf with a patterned cloth under it	An illustration of a coffee mug on a saucer next to a bookshelf in the foreground
A photo of a koala clinging to a tree during snowfall	A photo of a gray koala clinging to a tree during snowfall	A photo of 2 koalas clinging to a tree during snowfall	A photo of a koala clinging to a tree during snowfall with a frisbee nearby	A photo of a koala clinging to a tree during snowfall on the right side of the frame
A 3D render of a basketball hoop in a gym with a city bus passing by	A 3D render of a yellow basketball hoop in a gym with a city bus passing by	A 3D render of 2 basketball hoops in a gym with a city bus passing by	A 3D render of a basketball hoop in a gym with a city bus passing by with a pump next to it	A 3D render of a basketball hoop in a gym with a city bus passing by tilted slightly to the right
A digital art image of a camel on a dune field	A digital art image of a golden camel on a dune field	A digital art image of 2 camels on a dune field	A digital art image of a camel on a dune field next to a green ball	A digital art image of a camel on a dune field centered in the frame
An illustration of a laptop on a table	An illustration of a yellow laptop on a table	An illustration of 2 laptops on a table	An illustration of a laptop on a table with a star sticker on it	An illustration of a laptop on a table on the right side of the frame
A 3D render of a sunflower in a planter box with light shadows	A 3D render of a sunflower in a planter box with light shadows in a black pot	A 3D render of 3 sunflowers in a planter box with light shadows	A 3D render of a sunflower in a planter box with light shadows with a small watering can next to it	A 3D render of a sunflower in a planter box with light shadows on the right side of the frame
An illustration of a wolf howling on a hill with neon lights	An illustration of a black wolf howling on a hill with neon lights	An illustration of 3 wolves howling on a hill with neon lights	An illustration of a wolf howling on a hill with neon lights with a small bell on its collar	An illustration of a wolf howling on a hill with neon lights sitting instead
A photo of a laptop on a table with neon lights	A photo of a yellow laptop on a table with neon lights	A photo of 3 laptops on a table with neon lights	A photo of a laptop on a table with neon lights with a small plant beside it	A photo of a laptop on a table with neon lights on the right side of the frame
A 3D render of a baker by an oven on a rainy day	A 3D render of a baker by an oven on a rainy day wearing a blue jacket	A 3D render of 3 bakers by an oven on a rainy day	A 3D render of a baker by an oven on a rainy day wearing a straw hat	A 3D render of a baker by an oven on a rainy day sitting instead
A 3D render of a seal resting on a rock with balloons around	A 3D render of a gray seal resting on a rock with balloons around	A 3D render of 2 seals resting on a rock with balloons around	A 3D render of a seal resting on a rock with balloons around next to a green ball	A 3D render of a seal resting on a rock with balloons around lying down instead
A watercolor painting of a microscope on a lab bench	A watercolor painting of a red microscope on a lab bench	A watercolor painting of 2 microscopes on a lab bench	A watercolor painting of a microscope on a lab bench with a small plant beside it	A watercolor painting of a microscope on a lab bench on the right side of the frame
A photo of a parrot on a wooden perch on a wooden floor	A photo of a gray parrot on a wooden perch on a wooden floor	A photo of 3 parrots on a wooden perch on a wooden floor	A photo of a parrot on a wooden perch on a wooden floor wearing blue glasses	A photo of a parrot on a wooden perch on a wooden floor curling up
A digital art image of a car parked on a coastal road near a street market	A digital art image of a red car parked on a coastal road near a street market	A digital art image of 2 cars parked on a coastal road near a street market	A digital art image of a car parked on a coastal road near a street market with a bicycle mounted on the back	A digital art image of a car parked on a coastal road near a street market centered in the frame
An illustration of a chef in a kitchen with light shadows	An illustration of a chef in a kitchen with light shadows wearing a teal jacket	An illustration of 2 cheves in a kitchen with light shadows	An illustration of a chef in a kitchen with light shadows wearing red headphones	An illustration of a chef in a kitchen with light shadows in the background
A 3D render of a vr headset on a table with snowy peaks behind	A 3D render of a blue vr headset on a table with snowy peaks behind	A 3D render of 3 vr headsets on a table with snowy peaks behind	A 3D render of a vr headset on a table with snowy peaks behind with a small plant beside it	A 3D render of a vr headset on a table with snowy peaks behind on the right side of the frame
A 3D render of a book on a desk	A 3D render of a pink book on a desk	A 3D render of 2 books on a desk	A 3D render of a book on a desk with a folded note next to it	A 3D render of a book on a desk under a hanging lamp
A watercolor painting of a monkey hanging from a vine	A watercolor painting of a brown monkey hanging from a vine	A watercolor painting of 2 monkeys hanging from a vine	A watercolor painting of a monkey hanging from a vine wearing blue glasses	A watercolor painting of a monkey hanging from a vine jumping mid-air
An illustration of a house on a quiet street	An illustration of a green house on a quiet street	An illustration of 3 houses on a quiet street	An illustration of a house on a quiet street with a bench in front	An illustration of a house on a quiet street with the main door on the left
A digital art image of a soccer ball on a grassy field near a graffiti wall	A digital art image of a red soccer ball on a grassy field near a graffiti wall	A digital art image of 3 soccer balls on a grassy field near a graffiti wall	A digital art image of a soccer ball on a grassy field near a graffiti wall with a scorecard in view	A digital art image of a soccer ball on a grassy field near a graffiti wall in the background
An illustration of a eagle flying over mountains beside a tree	An illustration of a white eagle flying over mountains beside a tree	An illustration of 2 eagles flying over mountains beside a tree	An illustration of a eagle flying over mountains beside a tree with a frisbee nearby	An illustration of a eagle flying over mountains beside a tree sitting instead
A photo of a skier on a snowy slope with paper lanterns	A photo of a skier on a snowy slope with paper lanterns wearing a blue jacket	A photo of 3 skiers on a snowy slope with paper lanterns	A photo of a skier on a snowy slope with paper lanterns wearing a straw hat	A photo of a skier on a snowy slope with paper lanterns jumping mid-air
A watercolor painting of a skier on a snowy slope	A watercolor painting of a skier on a snowy slope wearing a yellow jacket	A watercolor painting of 3 skiers on a snowy slope	A watercolor painting of a skier on a snowy slope carrying a backpack	A watercolor painting of a skier on a snowy slope sitting instead
A digital art image of a headphone on a stand under overcast skies	A digital art image of a pink headphone on a stand under overcast skies	A digital art image of 3 headphones on a stand under overcast skies	A digital art image of a headphone on a stand under overcast skies with a tiny key lying nearby	A digital art image of a headphone on a stand under overcast skies tilted slightly to the left
A photo of a earbuds in a charging case with dramatic shadows	A photo of a black earbuds in a charging case with dramatic shadows	A photo of 3 earbudses in a charging case with dramatic shadows	A photo of a earbuds in a charging case with dramatic shadows with headphones plugged in	A photo of a earbuds in a charging case with dramatic shadows centered in the frame
A watercolor painting of a tennis racket on a court	A watercolor painting of a blue tennis racket on a court	A watercolor painting of 2 tennis rackets on a court	A watercolor painting of a tennis racket on a court with a sports bag beside it	A watercolor painting of a tennis racket on a court on the right side of the frame
A 3D render of a bear near a riverbank	A 3D render of a white bear near a riverbank	A 3D render of 2 bears near a riverbank	A 3D render of a bear near a riverbank wearing a red bandana	A 3D render of a bear near a riverbank on the right side of the frame
A digital art image of a bridge over a river	A digital art image of a green bridge over a river	A digital art image of 3 bridges over a river	A digital art image of a bridge over a river with a small flag above the door	A digital art image of a bridge over a river on the right side of the frame
A 3D render of a minivan in a suburban driveway	A 3D render of a silver minivan in a suburban driveway	A 3D render of 3 minivans in a suburban driveway	A 3D render of a minivan in a suburban driveway with a roof rack and a surfboard	A 3D render of a minivan in a suburban driveway in the foreground
A digital art image of a canoe pulled onto a riverbank	A digital art image of a red canoe pulled onto a riverbank	A digital art image of 3 canoes pulled onto a riverbank	A digital art image of a canoe pulled onto a riverbank with a bicycle mounted on the back	A digital art image of a canoe pulled onto a riverbank under a hanging lamp
A photo of a gardener in a backyard near a street market	A photo of a gardener in a backyard near a street market wearing a black jacket	A photo of 2 gardeners in a backyard near a street market	A photo of a gardener in a backyard near a street market carrying a backpack	A photo of a gardener in a backyard near a street market jumping mid-air
A digital art image of a game controller on a sofa indoors with soft lighting	A digital art image of a yellow game controller on a sofa indoors with soft lighting	A digital art image of 3 game controllers on a sofa indoors with soft lighting	A digital art image of a game controller on a sofa indoors with soft lighting with a small plant beside it	A digital art image of a game controller on a sofa indoors with soft lighting in the foreground
An illustration of a smartphone on a table	An illustration of a white smartphone on a table	An illustration of 3 smartphones on a table	An illustration of a smartphone on a table with headphones plugged in	An illustration of a smartphone on a table on top of a small pedestal
An illustration of a train crossing a steel bridge with cherry blossoms	An illustration of a black train crossing a steel bridge with cherry blossoms	An illustration of 2 trains crossing a steel bridge with cherry blossoms	An illustration of a train crossing a steel bridge with cherry blossoms with headlights turned on	An illustration of a train crossing a steel bridge with cherry blossoms on top of a small pedestal
An illustration of a basket on a market stall on polished concrete	An illustration of a orange basket on a market stall on polished concrete	An illustration of 3 baskets on a market stall on polished concrete	An illustration of a basket on a market stall on polished concrete with a star sticker on it	An illustration of a basket on a market stall on polished concrete on the left side of the frame
A 3D render of a headphone on a stand	A 3D render of a pink headphone on a stand	A 3D render of 2 headphones on a stand	A 3D render of a headphone on a stand with a star sticker on it	A 3D render of a headphone on a stand tilted slightly to the right
A watercolor painting of a drone on a workbench	A watercolor painting of a green drone on a workbench	A watercolor painting of 3 drones on a workbench	A watercolor painting of a drone on a workbench with a folded note next to it	A watercolor painting of a drone on a workbench in the background
A photo of a baseball glove on a bench	A photo of a yellow baseball glove on a bench	A photo of 2 baseball gloves on a bench	A photo of a baseball glove on a bench with a sports bag beside it	A photo of a baseball glove on a bench in the foreground
A photo of a baker by an oven with blooming flowers	A photo of a baker by an oven with blooming flowers wearing a red jacket	A photo of 3 bakers by an oven with blooming flowers	A photo of a baker by an oven with blooming flowers carrying a backpack	A photo of a baker by an oven with blooming flowers centered in the frame
A watercolor painting of a book on a desk with blooming flowers	A watercolor painting of a gray book on a desk with blooming flowers	A watercolor painting of 2 books on a desk with blooming flowers	A watercolor painting of a book on a desk with blooming flowers with a star sticker on it	A watercolor painting of a book on a desk with blooming flowers tilted slightly to the right
An illustration of a tablet on a couch next to a window	An illustration of a black tablet on a couch next to a window	An illustration of 2 tablets on a couch next to a window	An illustration of a tablet on a couch next to a window with a charging cable attached	An illustration of a tablet on a couch next to a window centered in the frame
An illustration of a fox in a snowy forest with paper lanterns	An illustration of a golden fox in a snowy forest with paper lanterns	An illustration of 2 foxes in a snowy forest with paper lanterns	An illustration of a fox in a snowy forest with paper lanterns wearing a red bandana	An illustration of a fox in a snowy forest with paper lanterns on the right side of the frame
An illustration of a kangaroo on a desert plain	An illustration of a gray kangaroo on a desert plain	An illustration of 3 kangaroos on a desert plain	An illustration of a kangaroo on a desert plain next to a green ball	An illustration of a kangaroo on a desert plain curling up
A 3D render of a scooter parked near a cafe on polished concrete	A 3D render of a green scooter parked near a cafe on polished concrete	A 3D render of 3 scooters parked near a cafe on polished concrete	A 3D render of a scooter parked near a cafe on polished concrete with headlights turned on	A 3D render of a scooter parked near a cafe on polished concrete on the right side of the frame
A photo of a bicycle leaning against a brick wall with a mountain lake behind	A photo of a black bicycle leaning against a brick wall with a mountain lake behind	A photo of 2 bicycles leaning against a brick wall with a mountain lake behind	A photo of a bicycle leaning against a brick wall with a mountain lake behind with headlights turned on	A photo of a bicycle leaning against a brick wall with a mountain lake behind on top of a small pedestal
A digital art image of a telescope by a balcony rail with autumn colors	A digital art image of a teal telescope by a balcony rail with autumn colors	A digital art image of 2 telescopes by a balcony rail with autumn colors	A digital art image of a telescope by a balcony rail with autumn colors with a tiny key lying nearby	A digital art image of a telescope by a balcony rail with autumn colors centered in the frame
An illustration of a camel on a dune field on a patterned rug	An illustration of a white camel on a dune field on a patterned rug	An illustration of 3 camels on a dune field on a patterned rug	An illustration of a camel on a dune field on a patterned rug wearing blue glasses	An illustration of a camel on a dune field on a patterned rug jumping mid-air
A photo of a candle on a table runner beside a garden path	A photo of a orange candle on a table runner beside a garden path	A photo of 2 candles on a table runner beside a garden path	A photo of a candle on a table runner beside a garden path with a folded note next to it	A photo of a candle on a table runner beside a garden path tilted slightly to the right
A digital art image of a violinist on a small stage with reflections on wet ground	A digital art image of a violinist on a small stage with reflections on wet ground wearing a purple jacket	A digital art image of 3 violinists on a small stage with reflections on wet ground	A digital art image of a violinist on a small stage with reflections on wet ground wearing a straw hat	A digital art image of a violinist on a small stage with reflections on wet ground on the right side of the frame
[truncated: 283 more rows]
